# Supplementary material for: Dinuclear zinc cooperative catalytic three-component reactions for highly enantioselective synthesis of 3,3′-dihydrofuran spirooxindoles
Source: Royal Society of Chemistry journal article supplement (doi:10.1039/c9ob01233h), 2019-01-01

## *Supplementary Information*

### **Dinuclear Zinc Cooperative Catalytic Three-Component Reactions for Highly Enantioselective Synthesis of 3,3'-Dihydrofuran Spirooxindoles**

Yu-Hang Miao, Yuan-Zhao Hua, and Min-Can Wang\*

*College of Chemistry and Molecular Engineering, Zhengzhou University, No. 75, Daxue Street, Zhengzhou City, Henan Province 450052, P. R. China*

\*E-mail: [wangmincan@zzu.edu.cn](mailto:wangmincan@zzu.edu.cn).

## **Contents**

|                                                |    |
|------------------------------------------------|----|
| <b>1. HPLC spectra of compounds</b> .....      | 2  |
| <b>2. X-ray crystal structure of 4am</b> ..... | 25 |
| <b>3. HRMS spectra of compounds</b> .....      | 27 |
| <b>4. NMR Spectra of compounds</b> .....       | 39 |

# 1. HPLC spectra of compounds

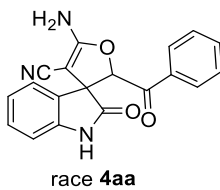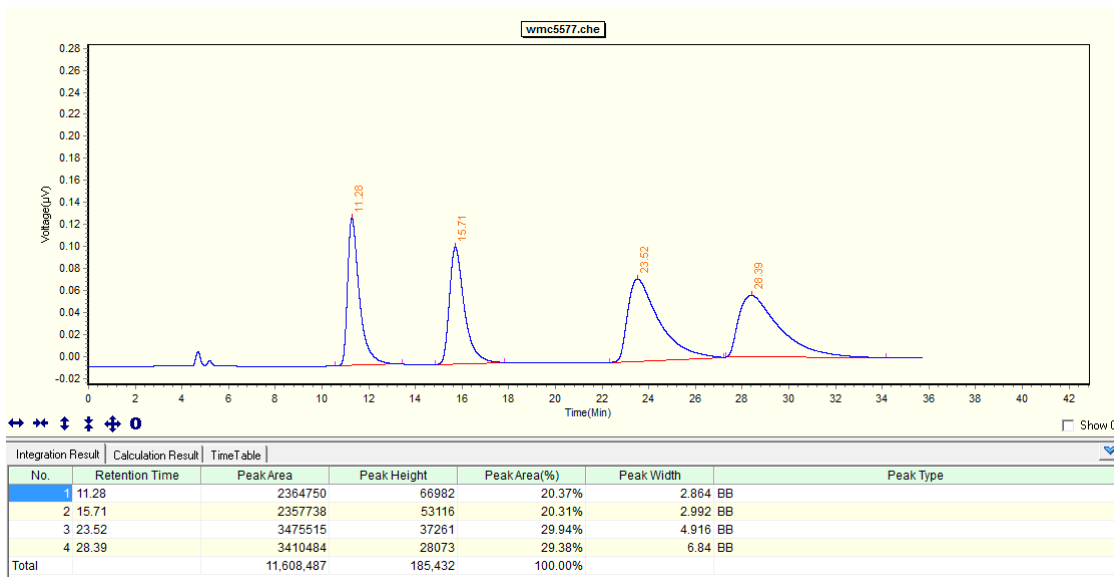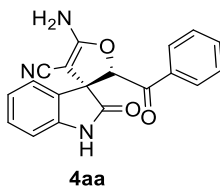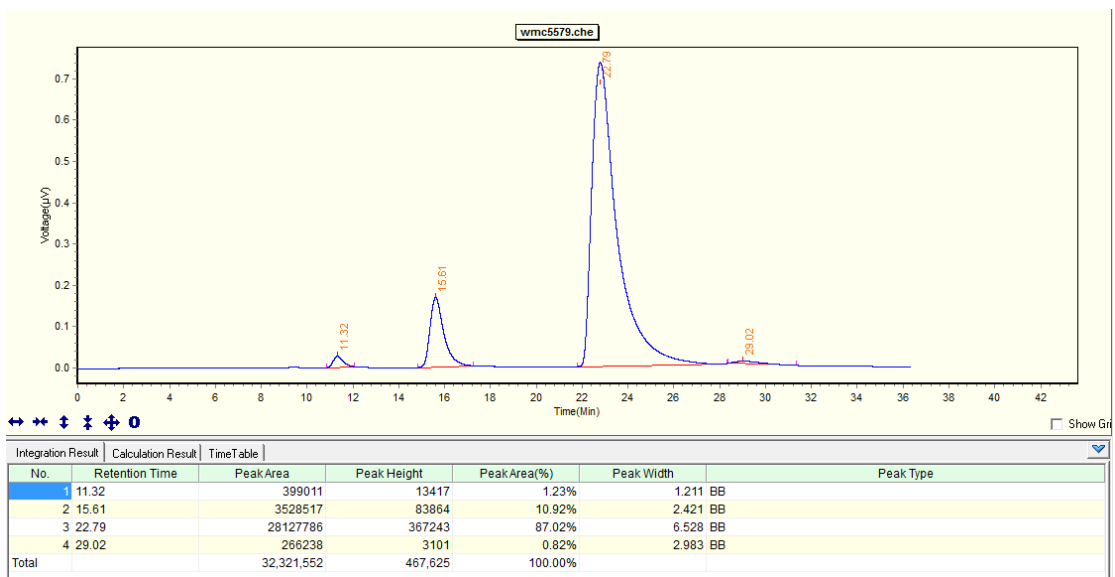

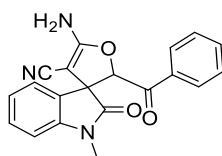

race 4ba

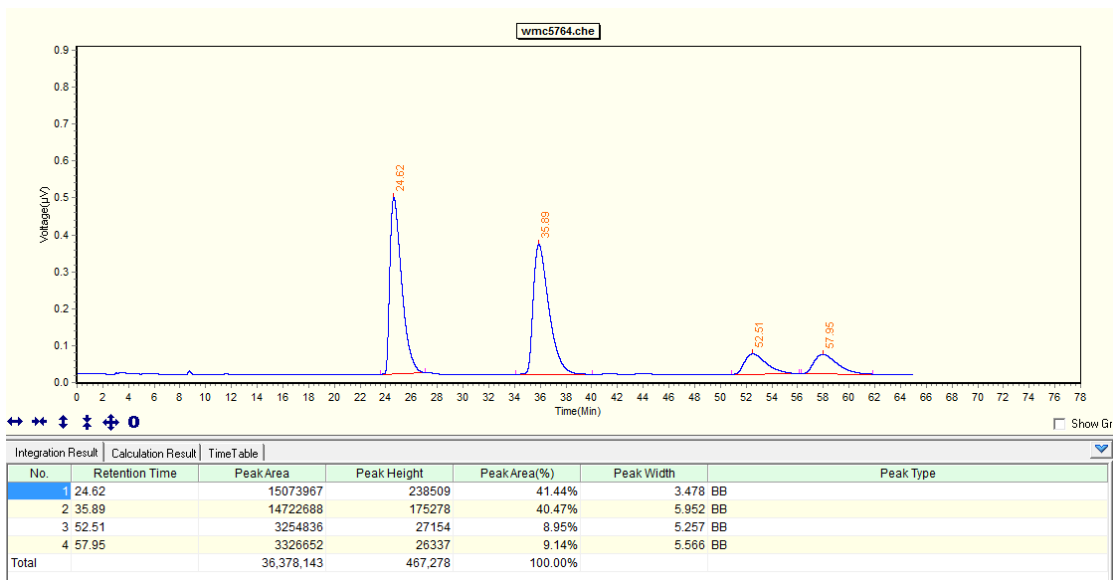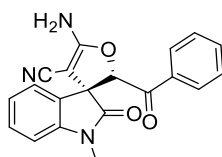

4ba

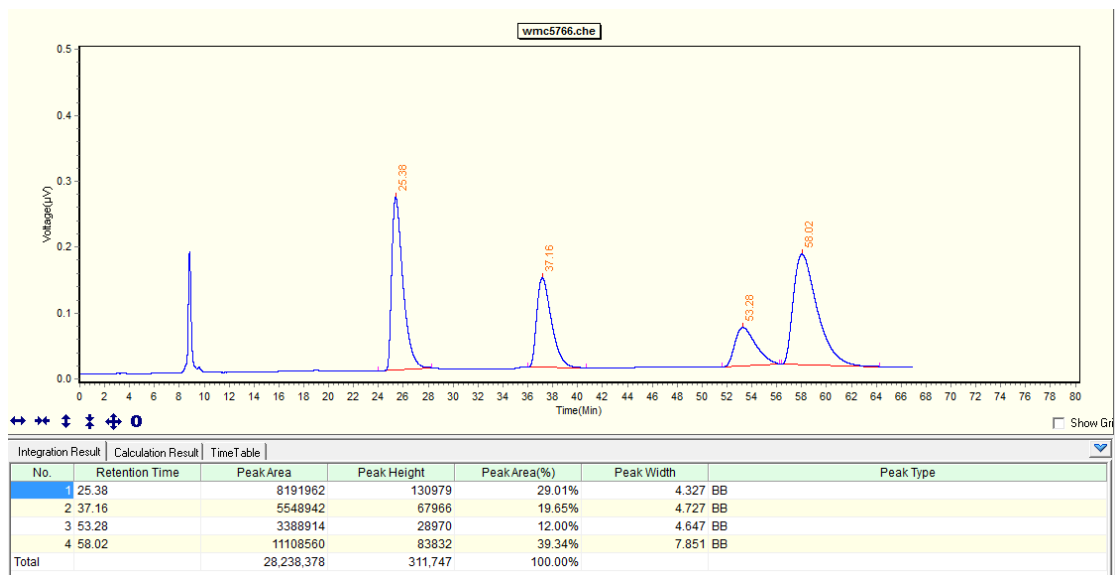

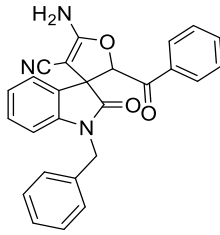

race 4ca

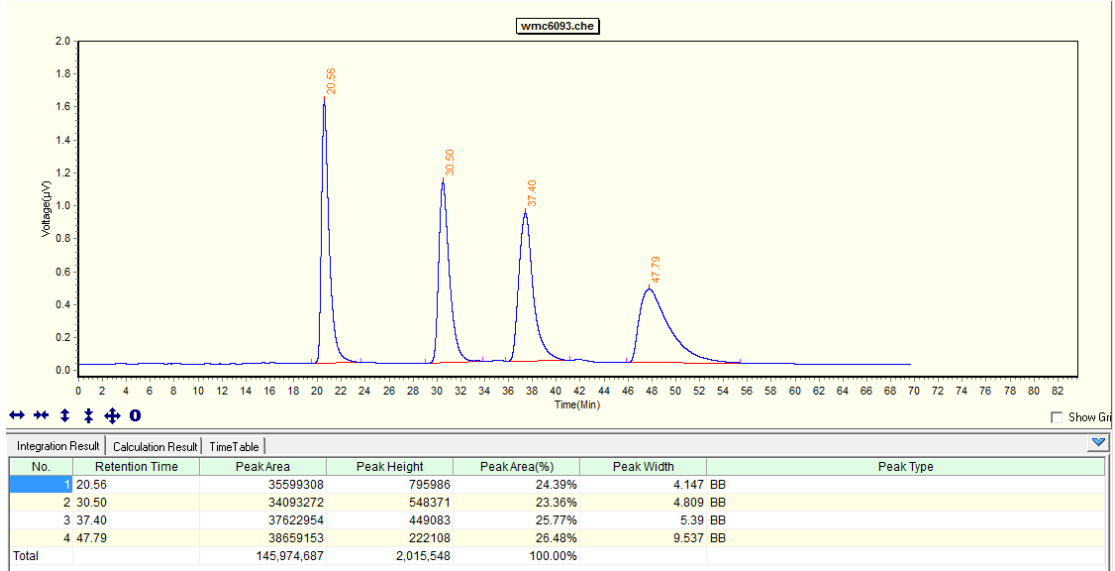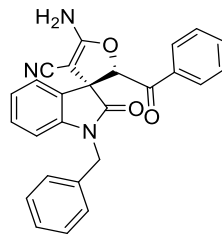

4ca

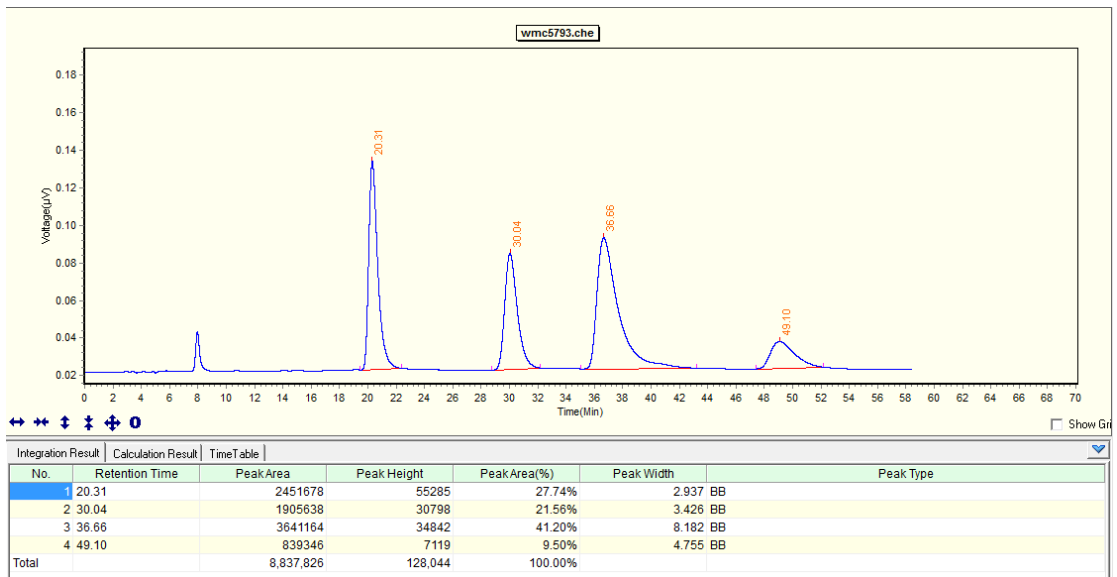

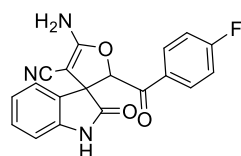

race 4ab

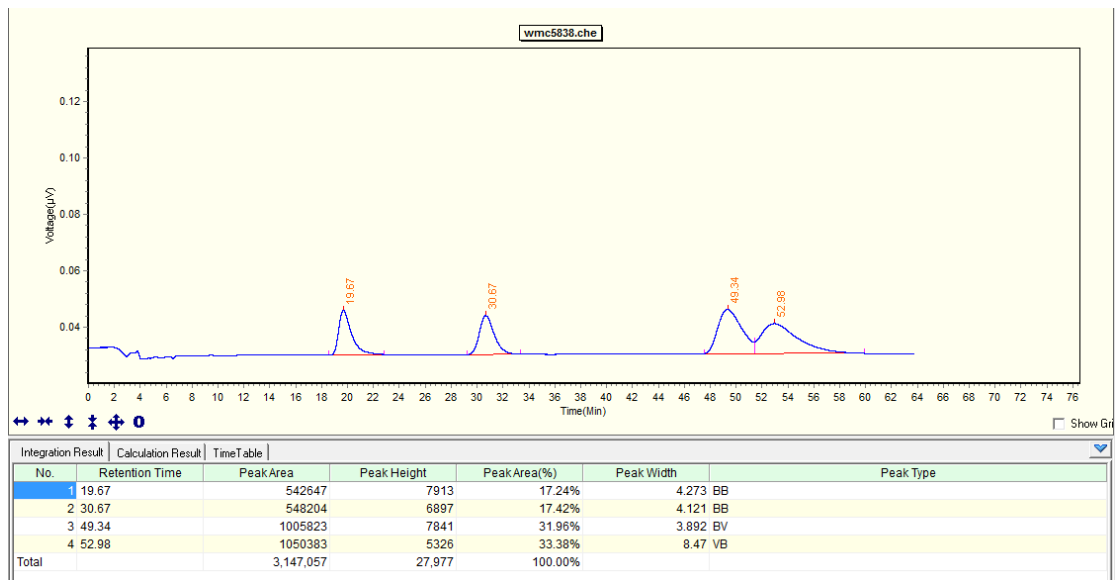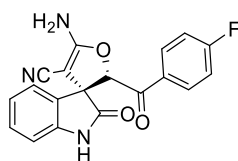

4ab

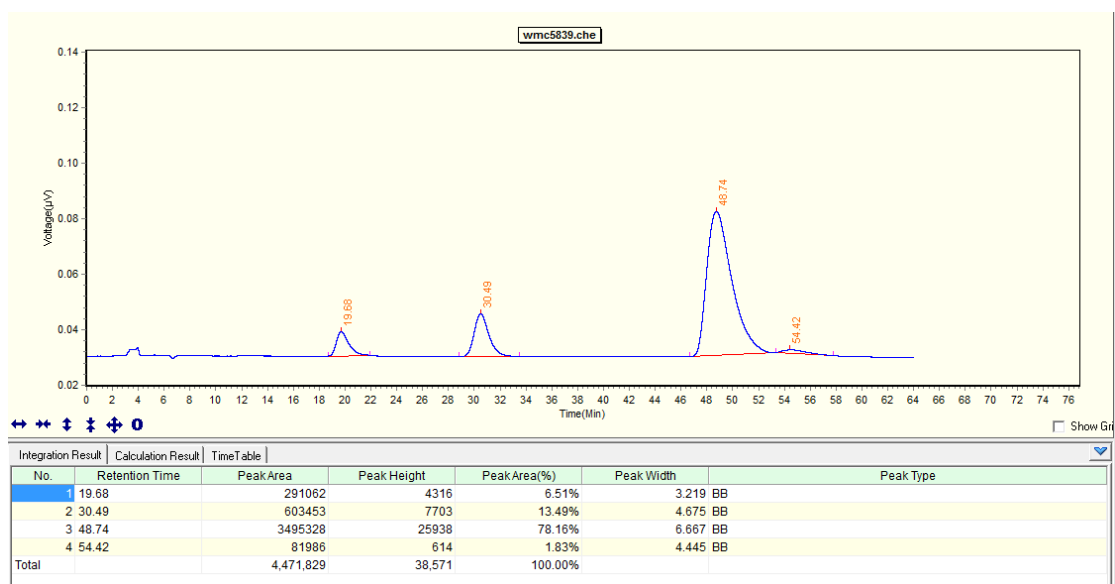

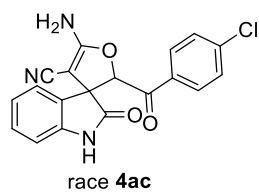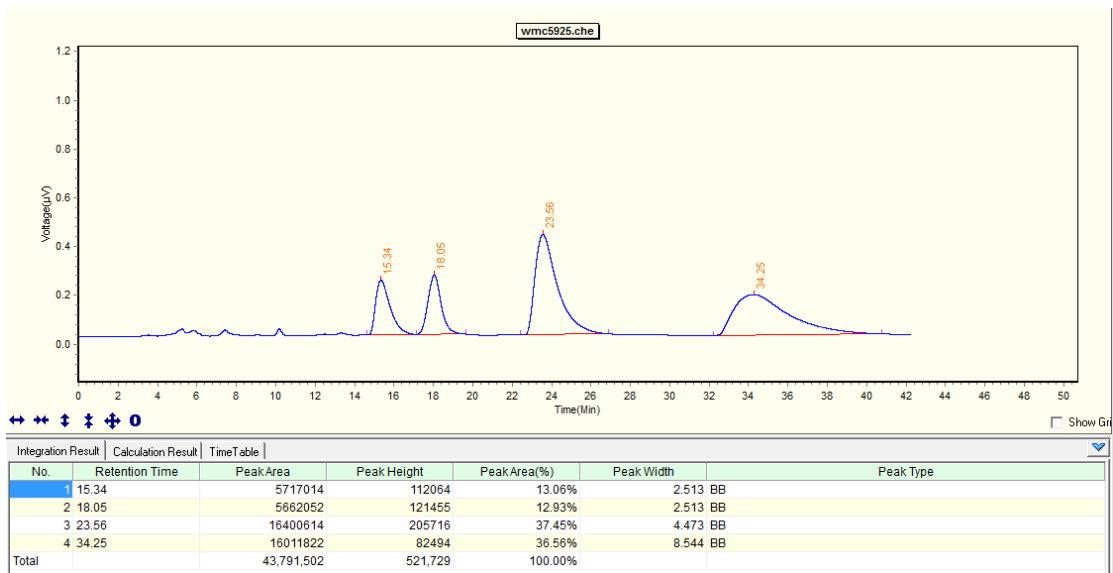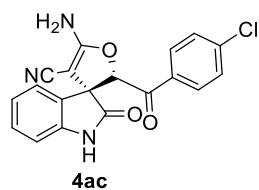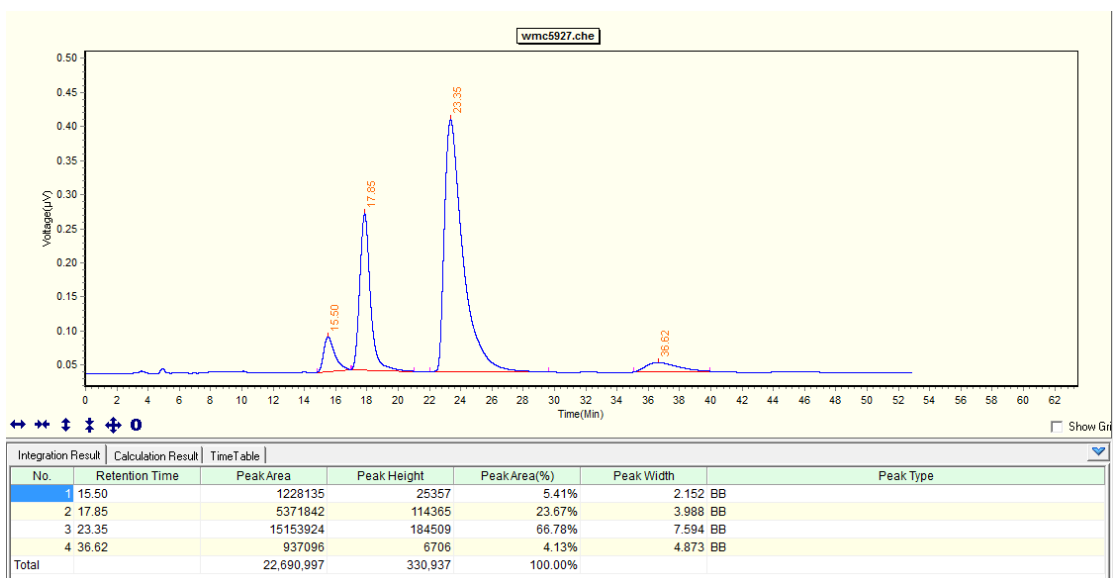

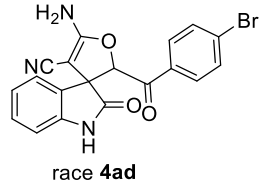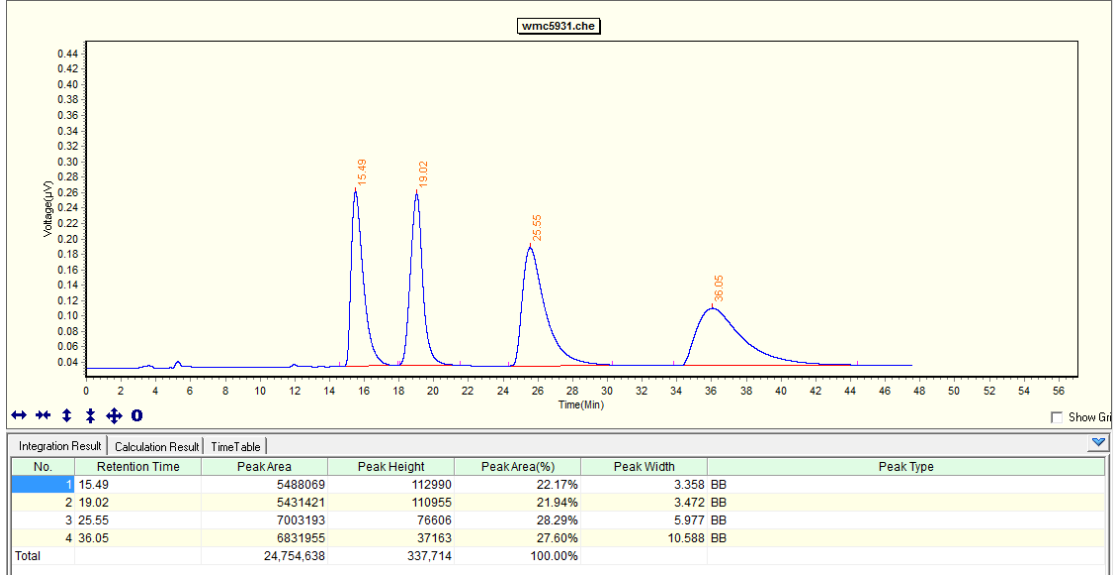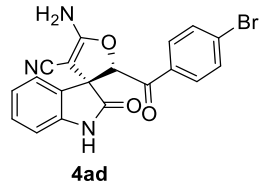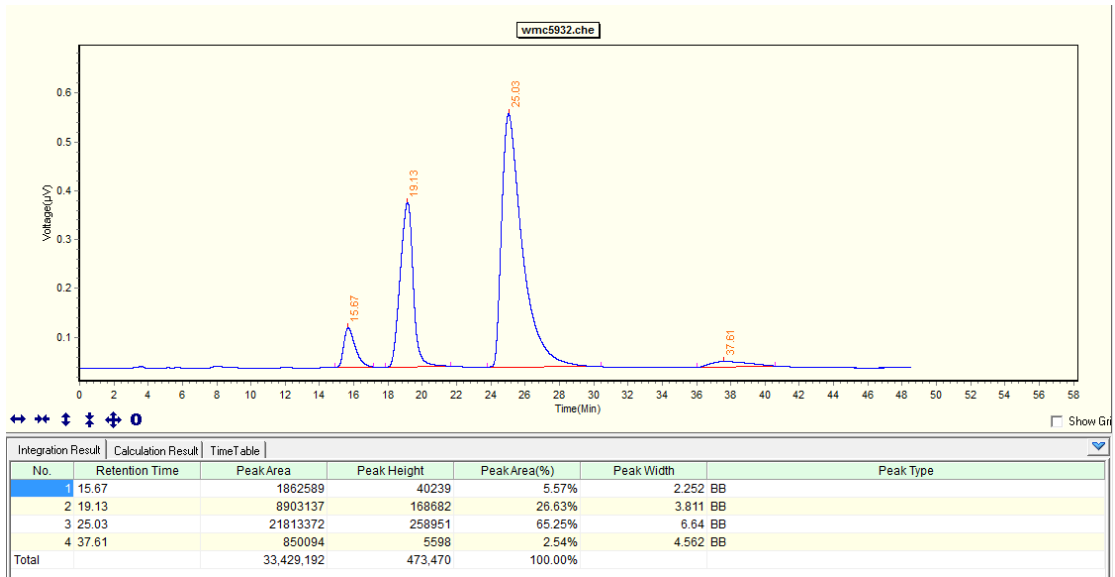

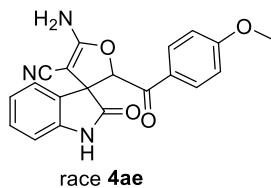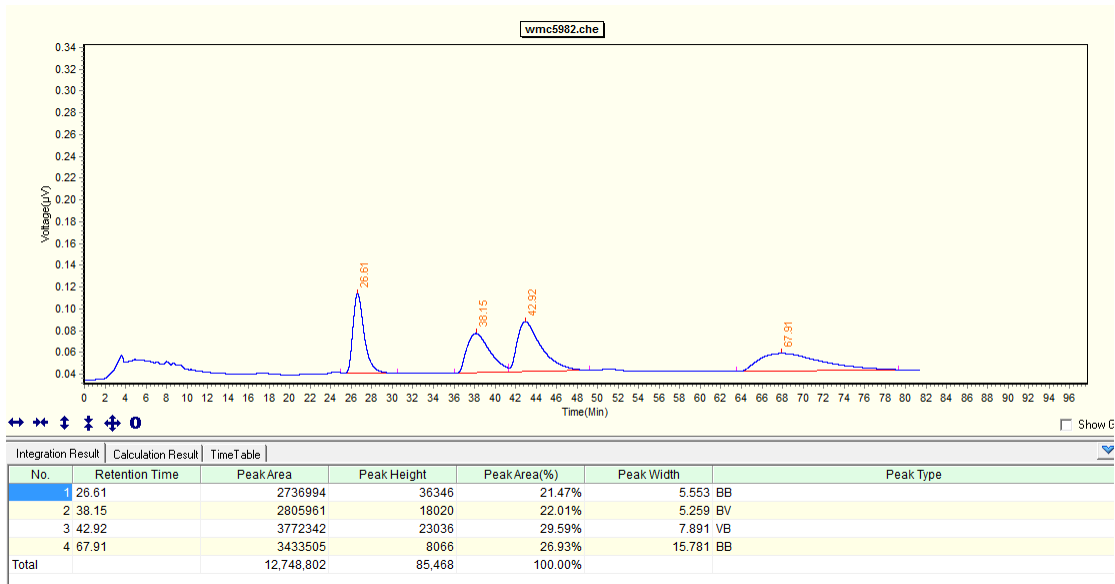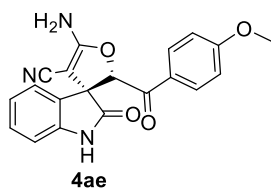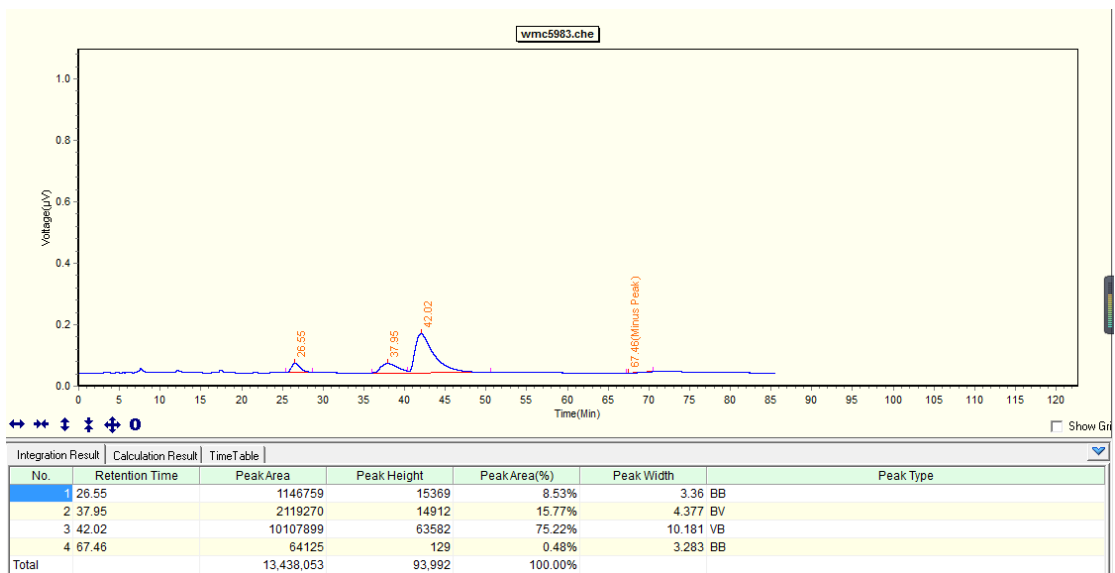



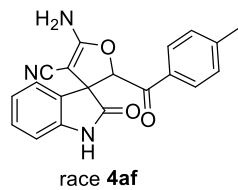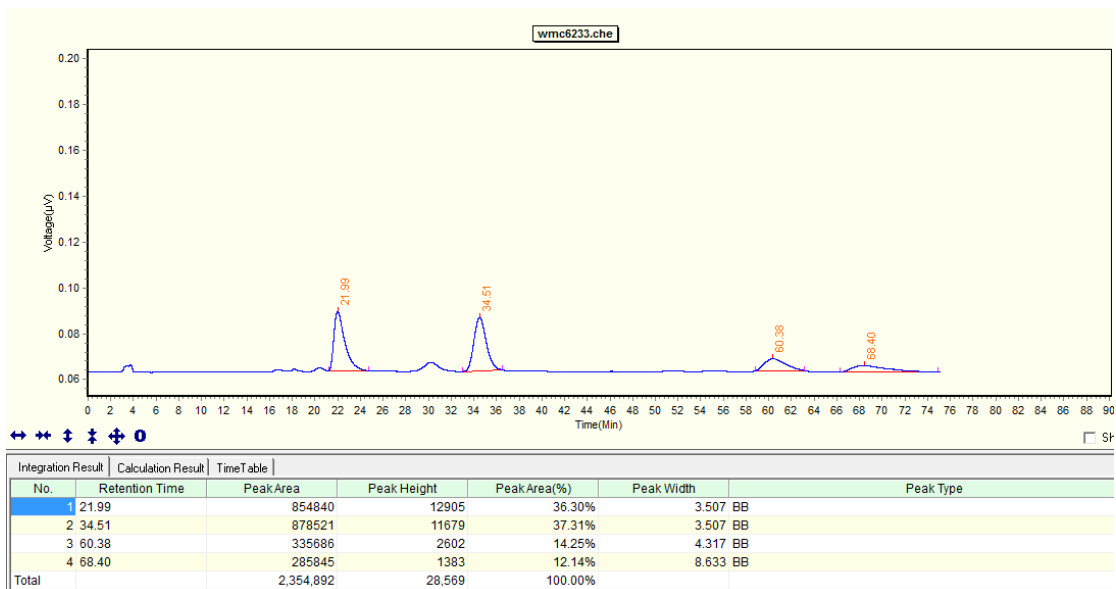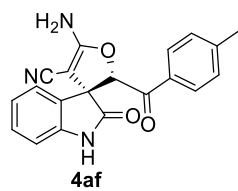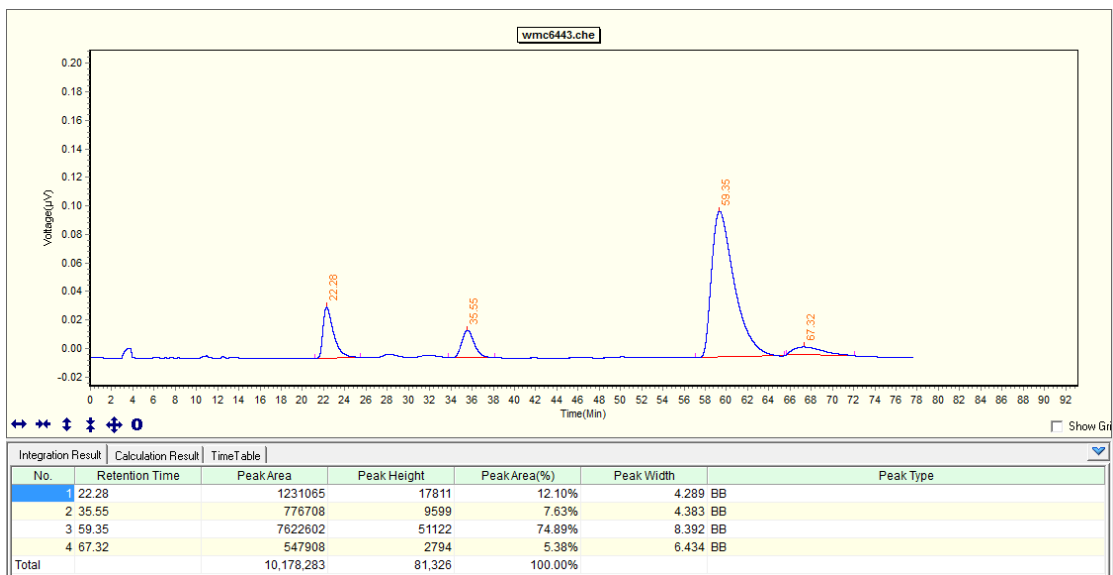

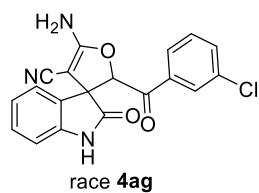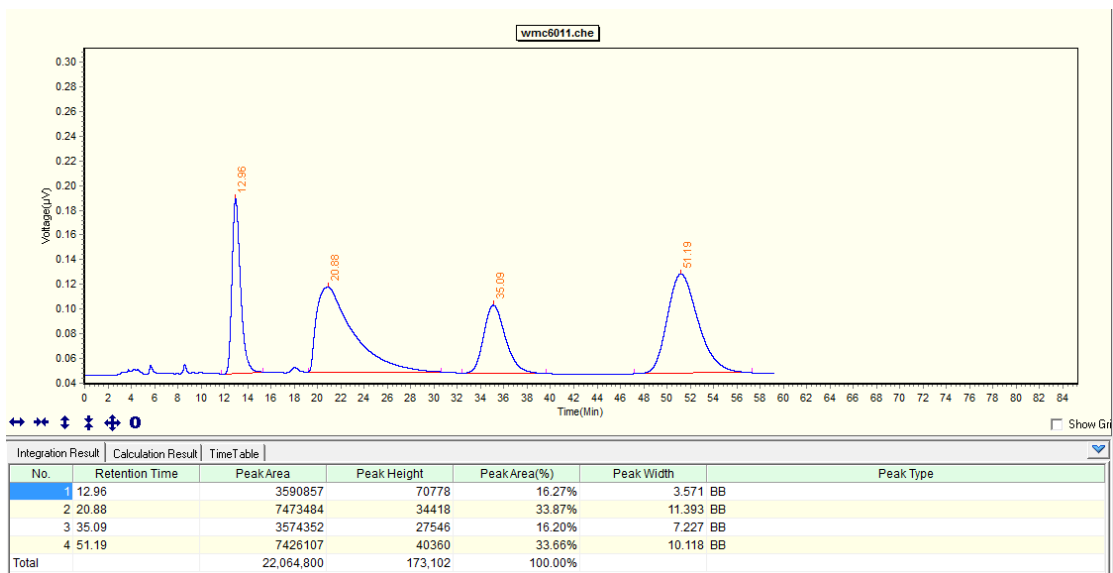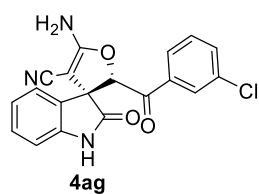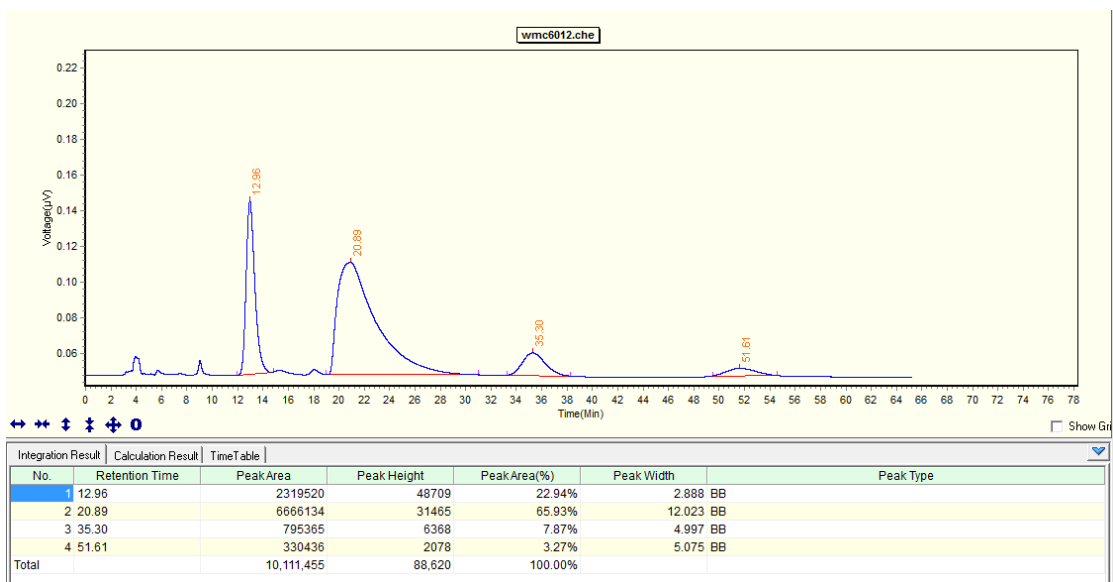

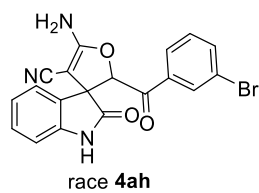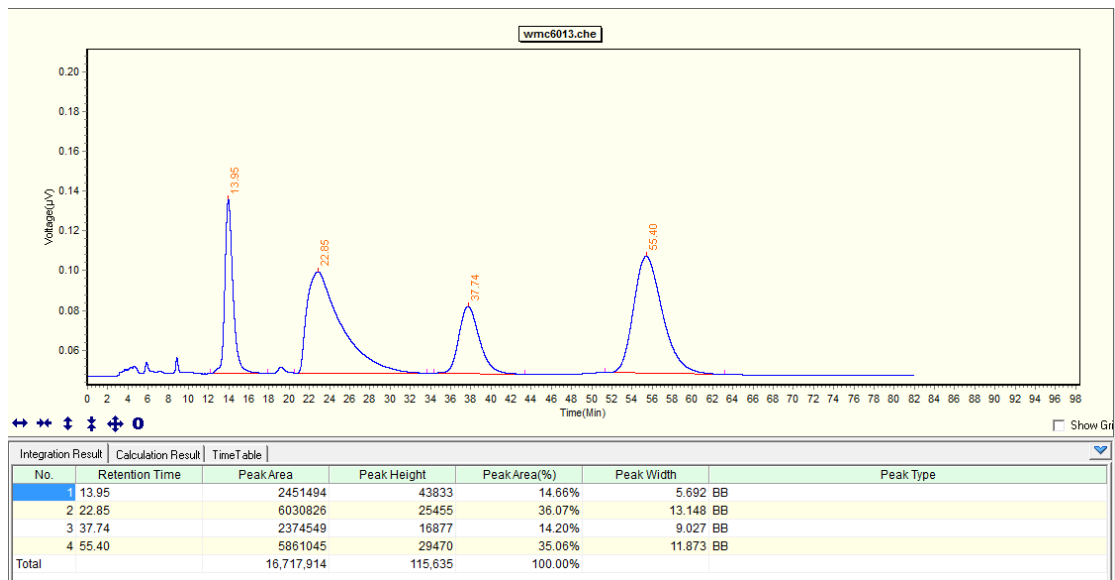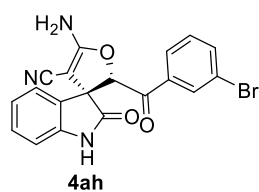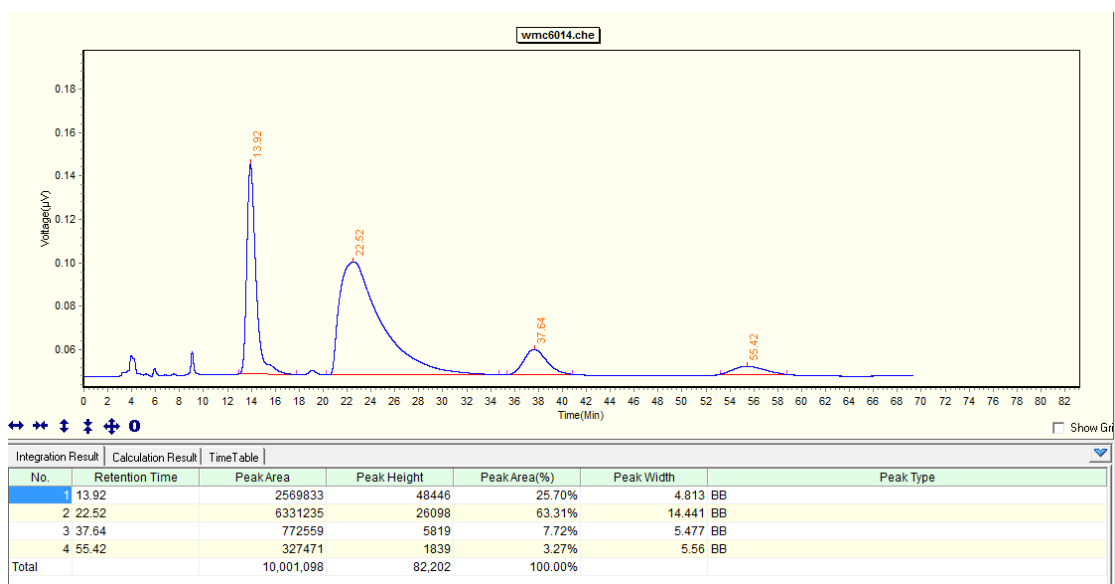

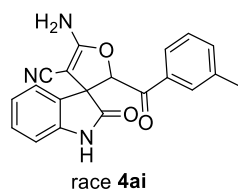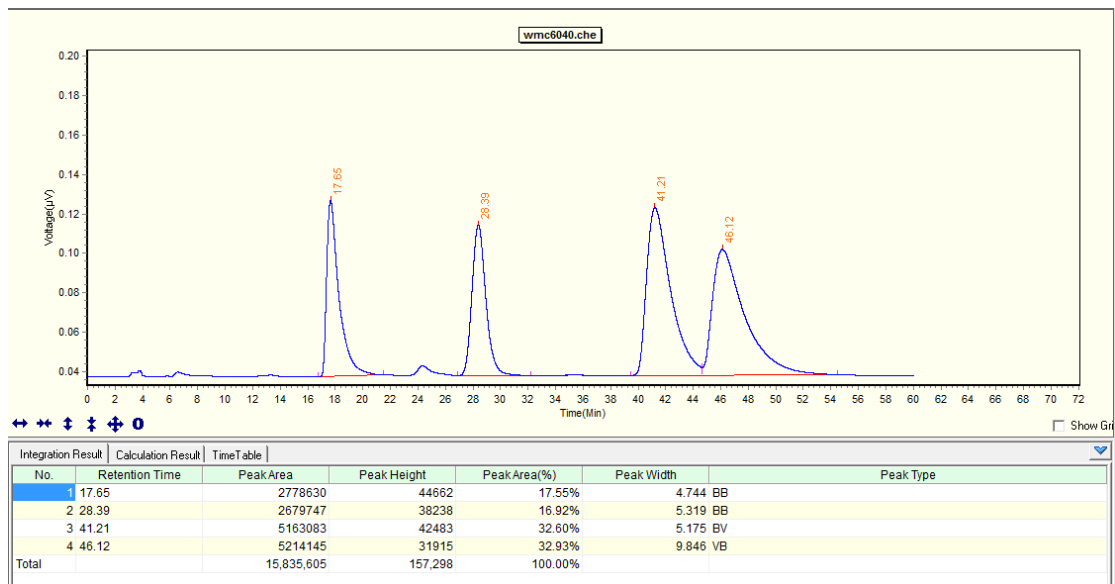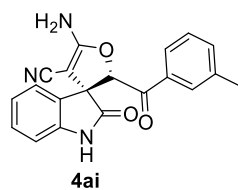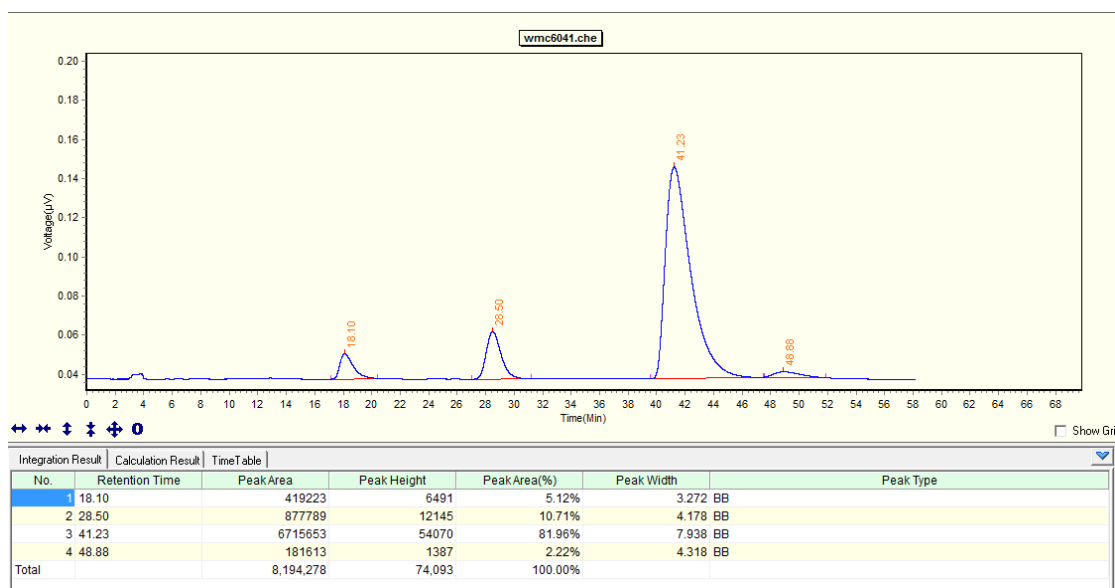

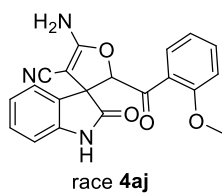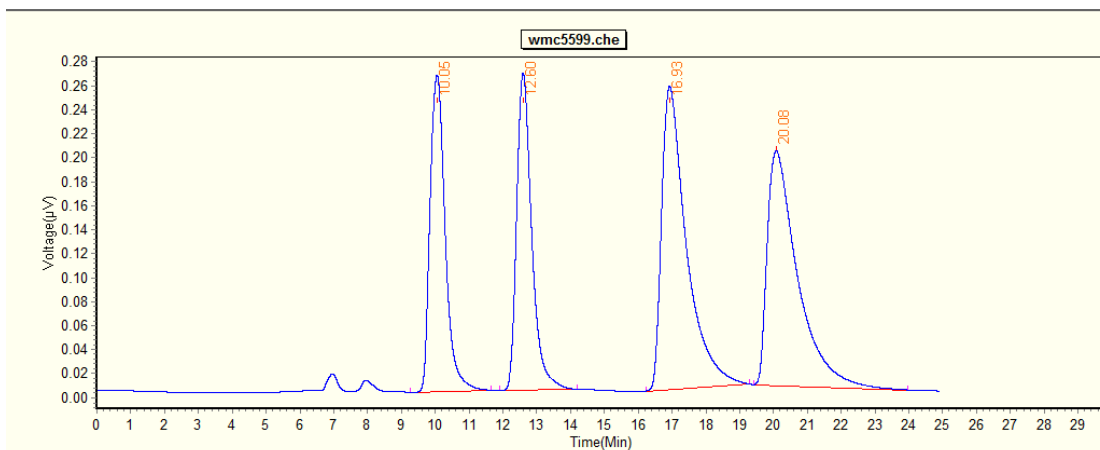

| No.   | Retention Time | Peak Area  | Peak Height | Peak Area(%) | Peak Width | Peak Type |
|-------|----------------|------------|-------------|--------------|------------|-----------|
| 1     | 10.05          | 4107997    | 131886      | 19.81%       | 2.388      | BB        |
| 2     | 12.60          | 4090441    | 132161      | 19.73%       | 2.292      | BB        |
| 3     | 16.93          | 6447855    | 126412      | 31.10%       | 3.056      | BB        |
| 4     | 20.08          | 6086048    | 97951       | 29.36%       | 4.551      | BB        |
| Total |                | 20,732,341 | 488,410     | 100.00%      |            |           |

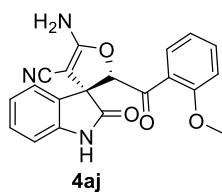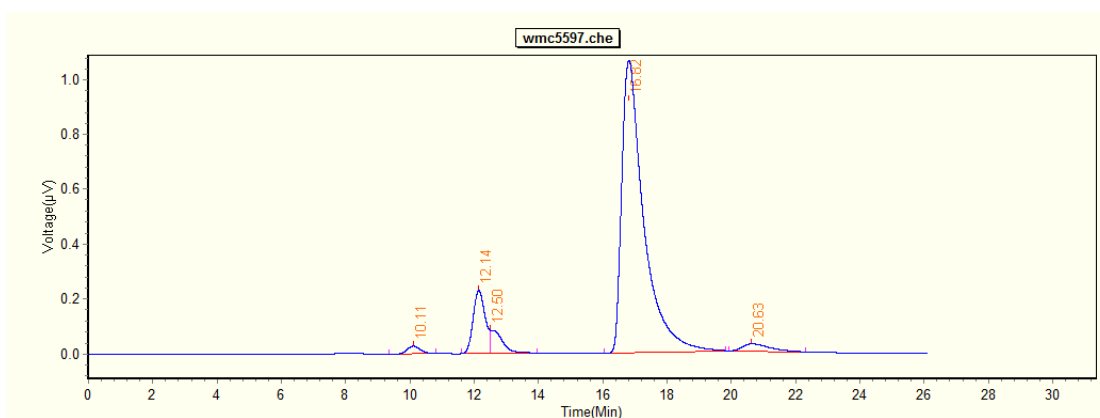

| No.   | Retention Time | Peak Area  | Peak Height | Peak Area(%) | Peak Width | Peak Type |
|-------|----------------|------------|-------------|--------------|------------|-----------|
| 1     | 10.11          | 379790     | 13697       | 1.25%        | 1.458      | BB        |
| 2     | 12.14          | 2996084    | 114961      | 9.83%        | 0.895      | BV        |
| 3     | 12.50          | 1097125    | 42371       | 3.60%        | 1.458      | VB        |
| 4     | 16.82          | 25244149   | 532564      | 82.81%       | 3.778      | BB        |
| 5     | 20.63          | 766125     | 13243       | 2.51%        | 2.386      | BB        |
| Total |                | 30,483,273 | 716,836     | 100.00%      |            |           |

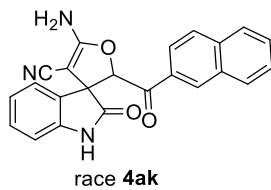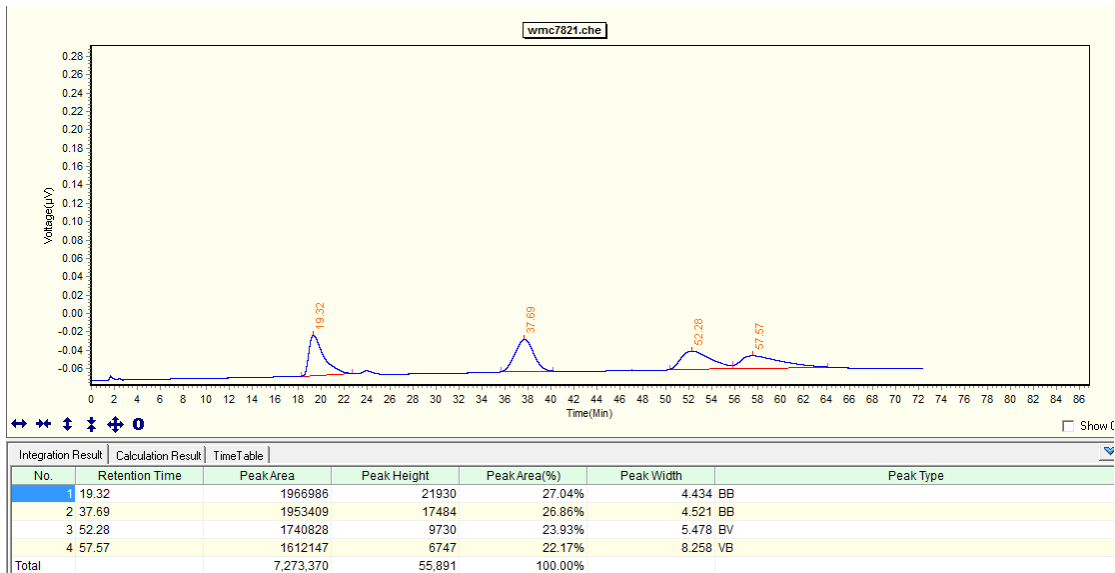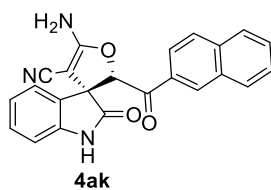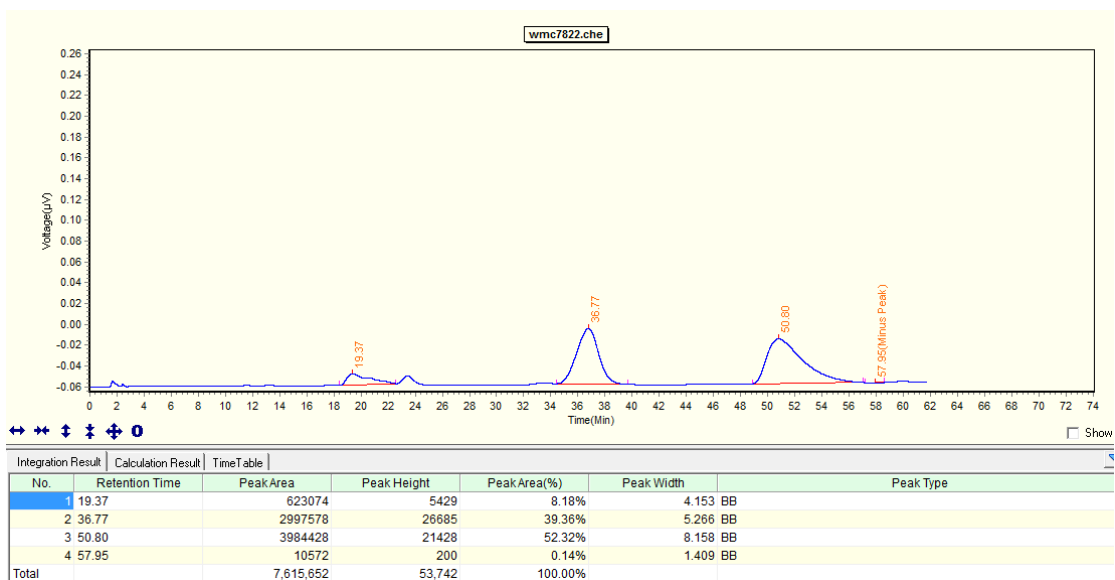

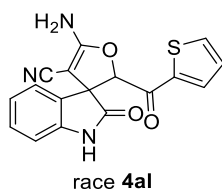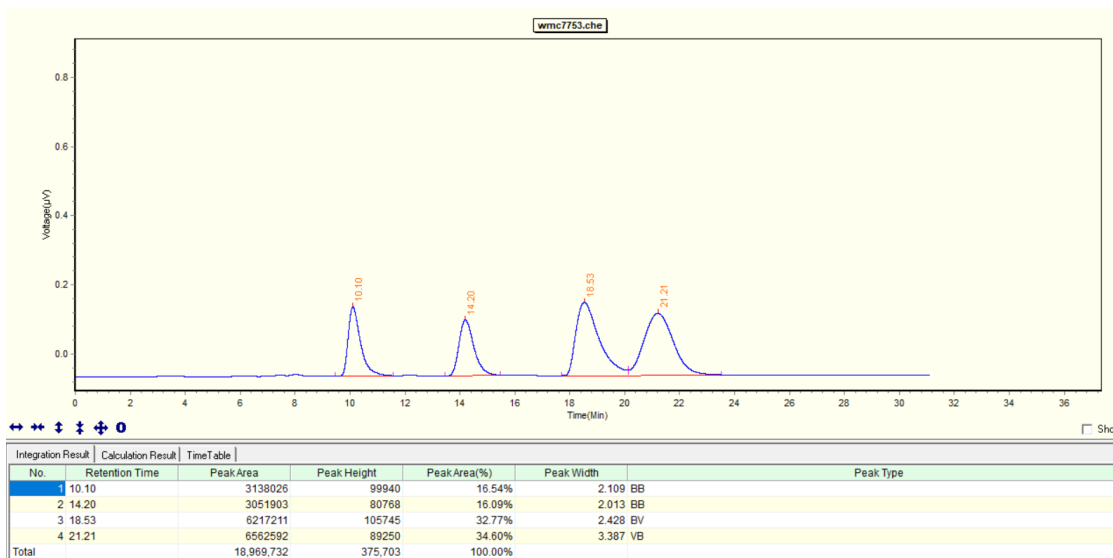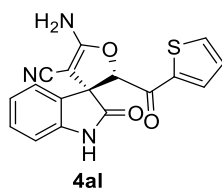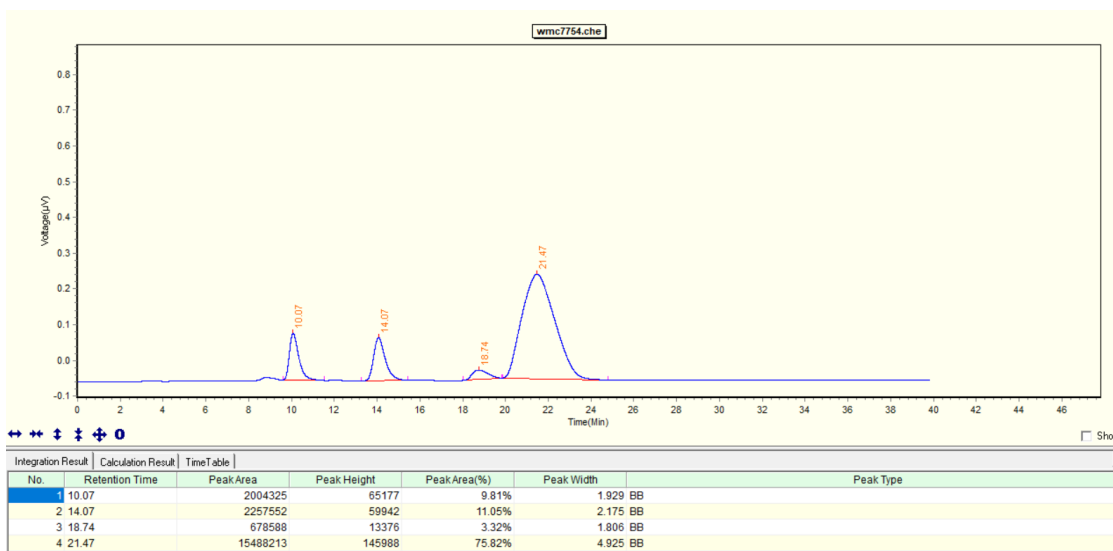

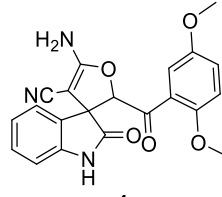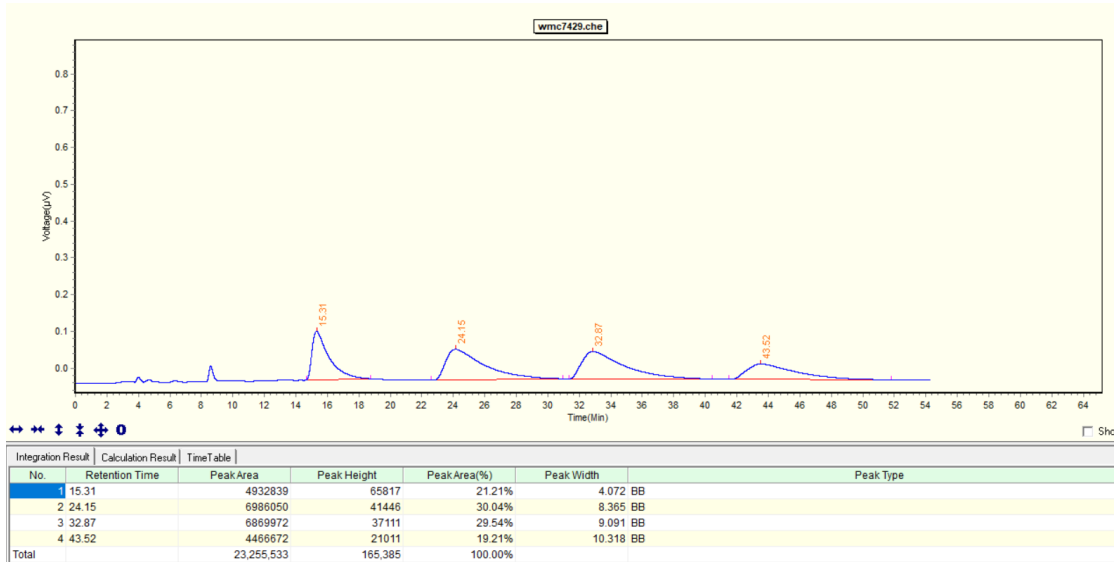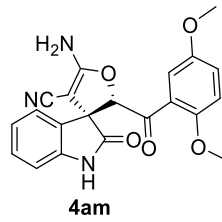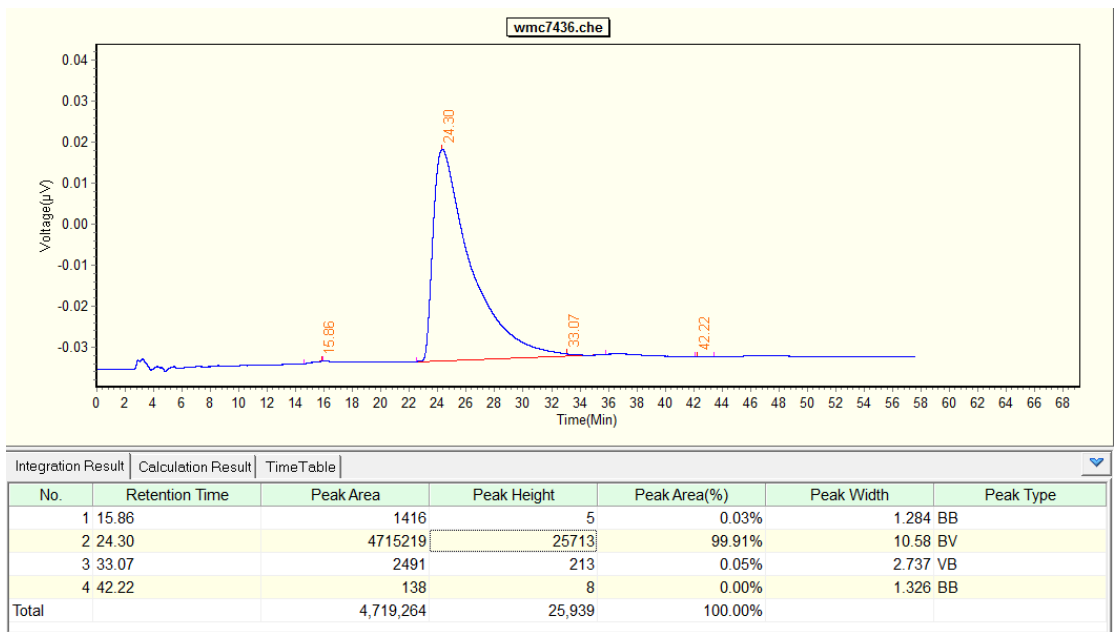



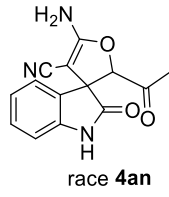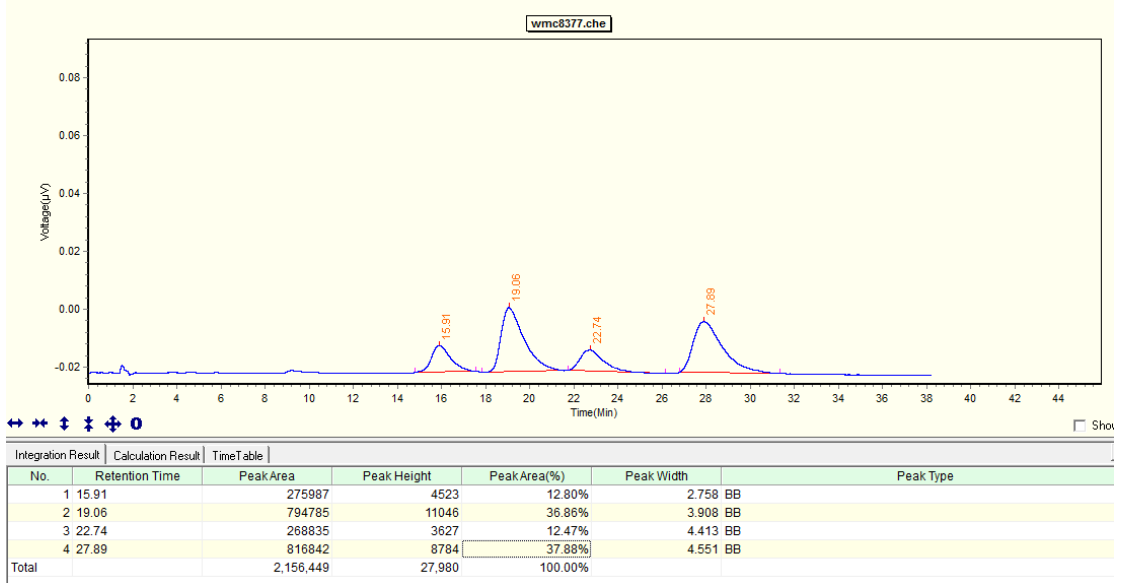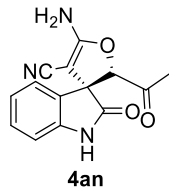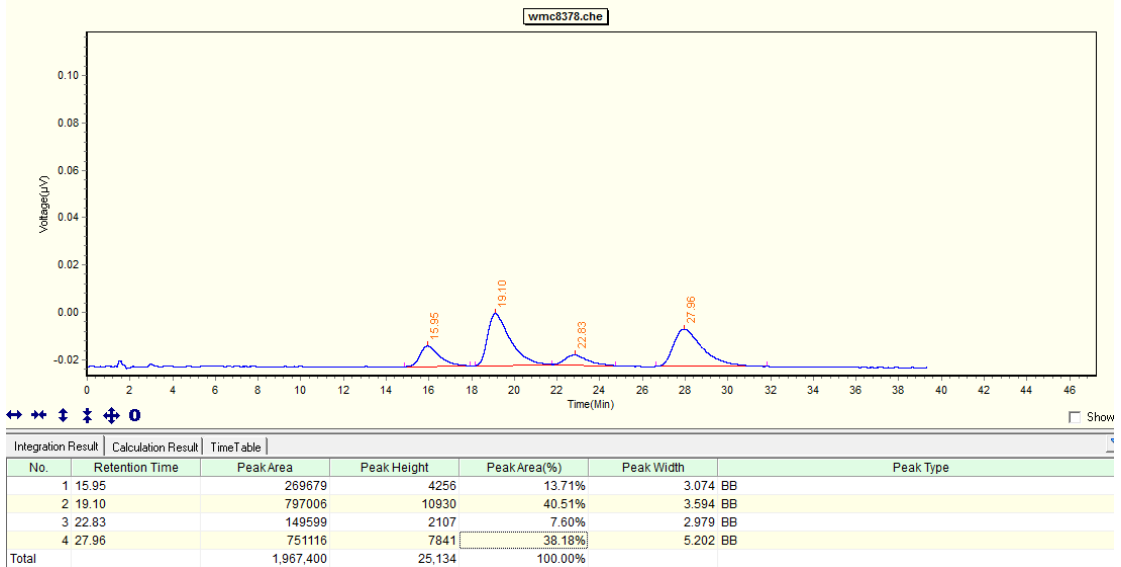

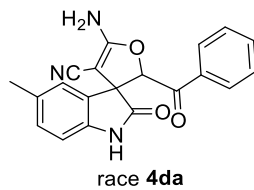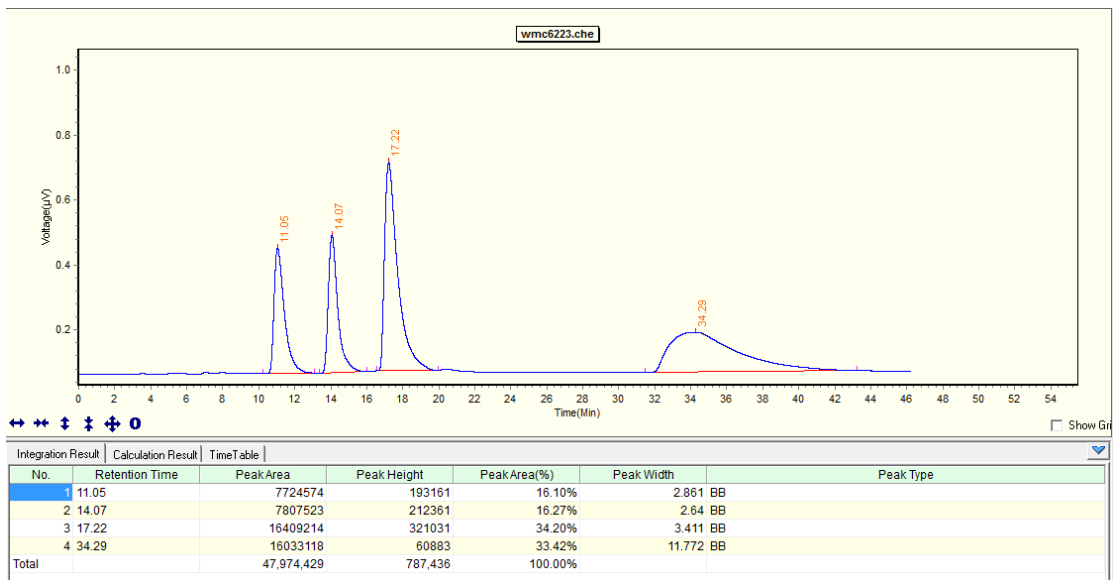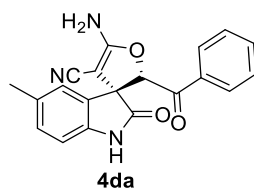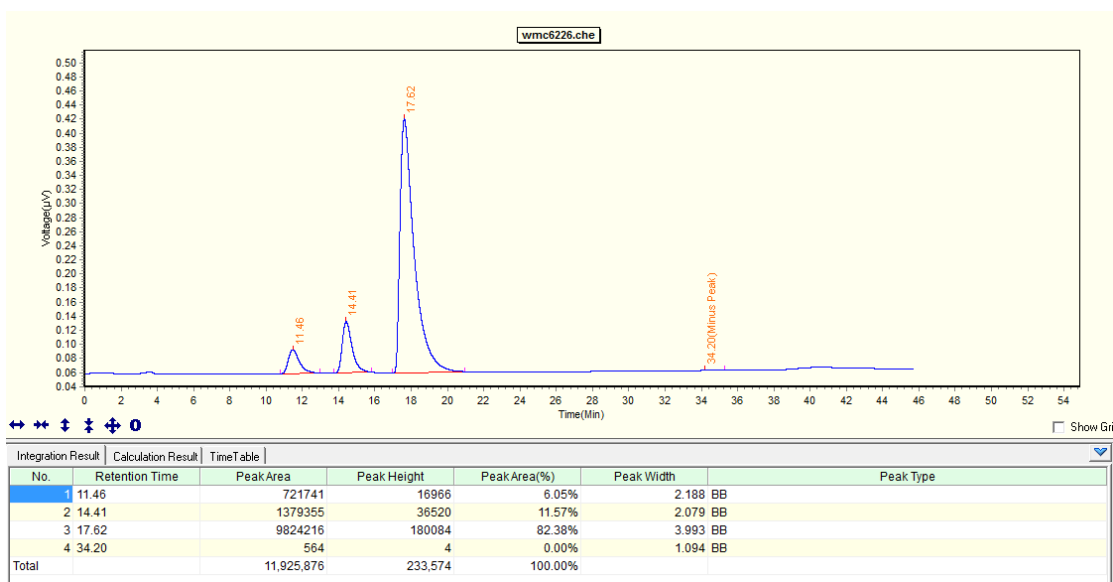

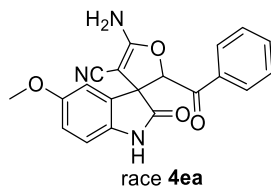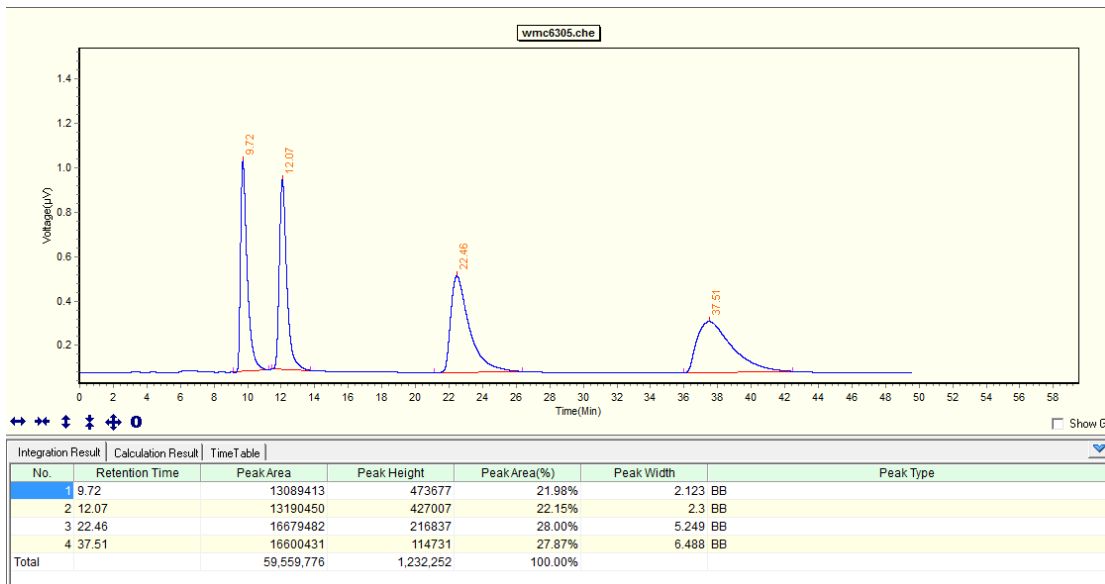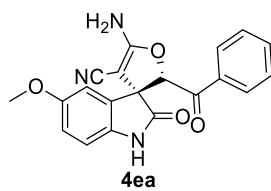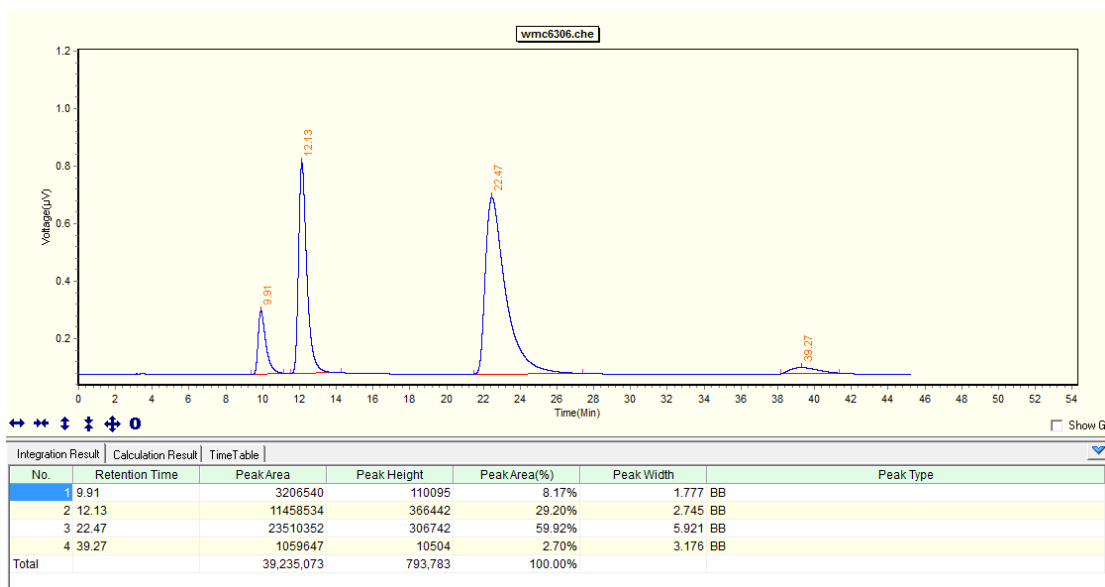

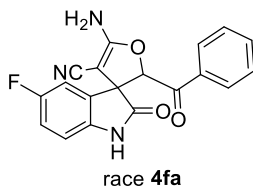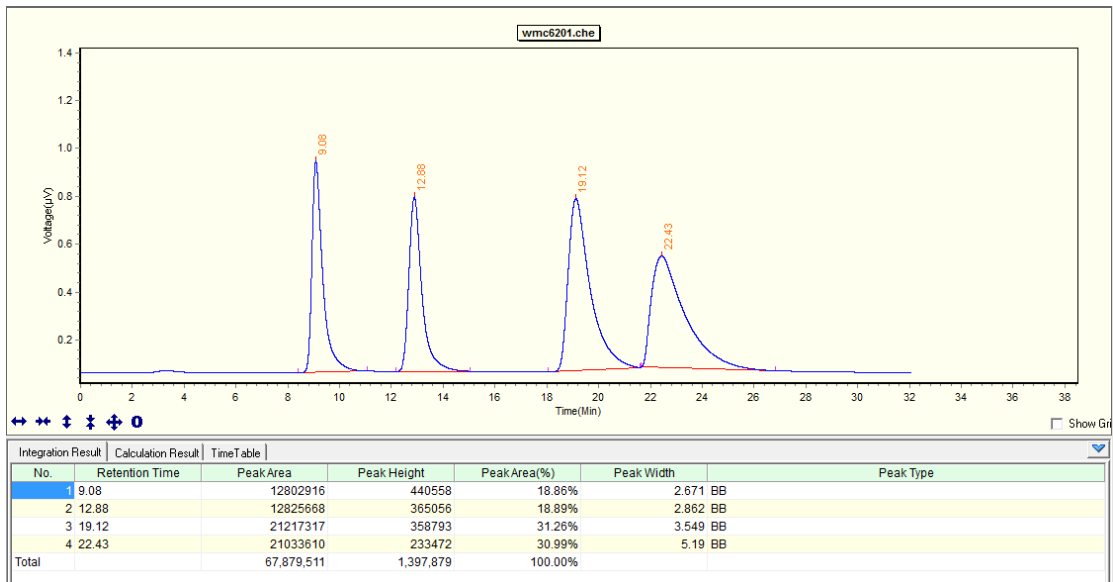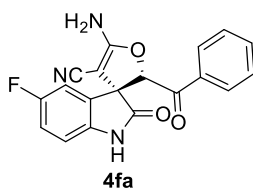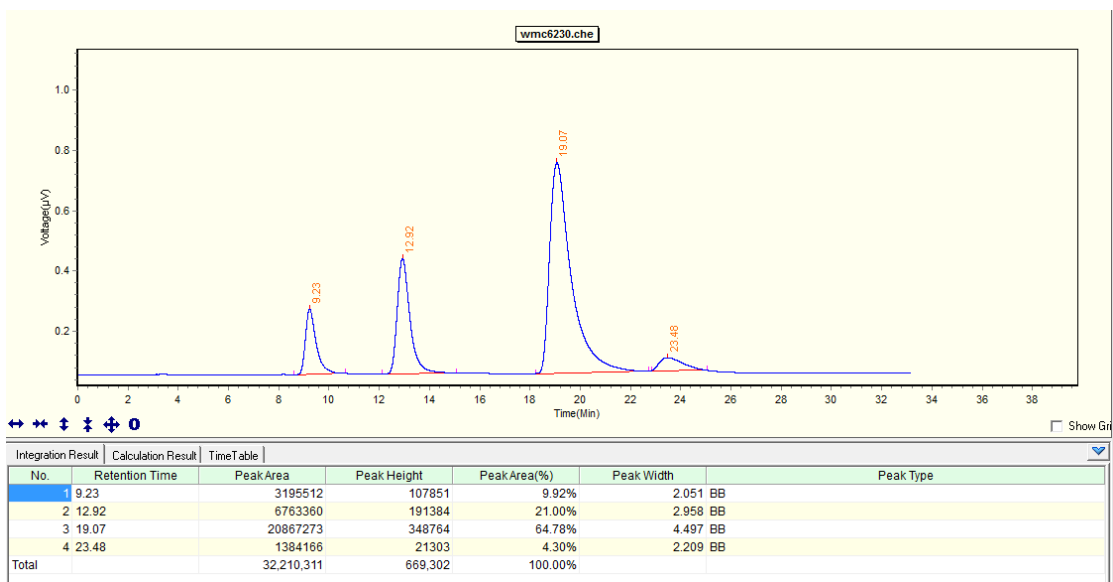

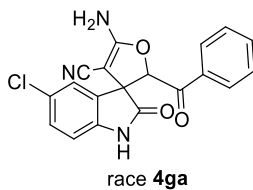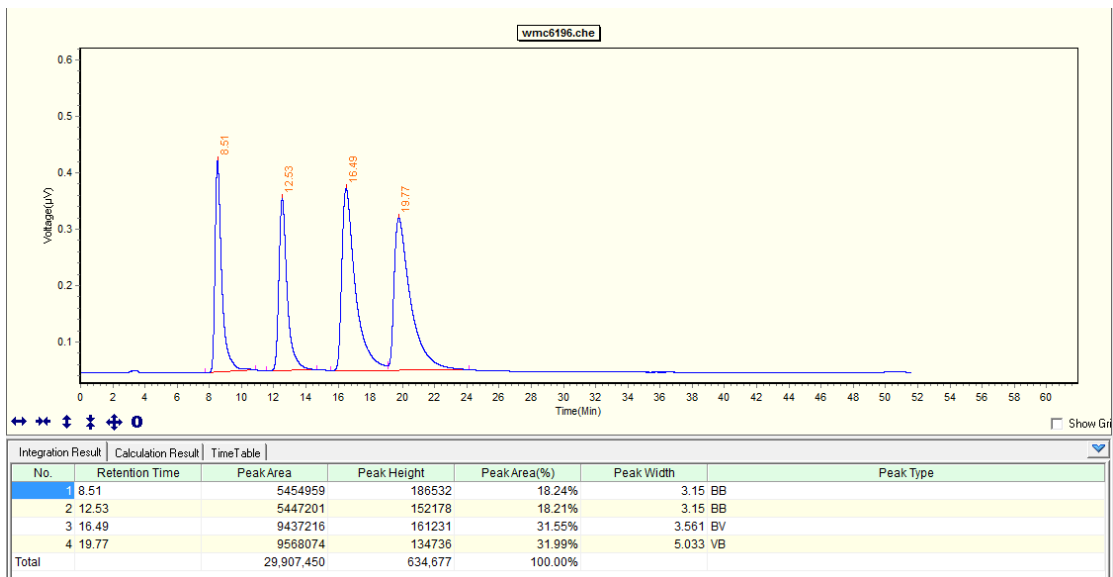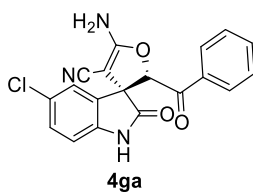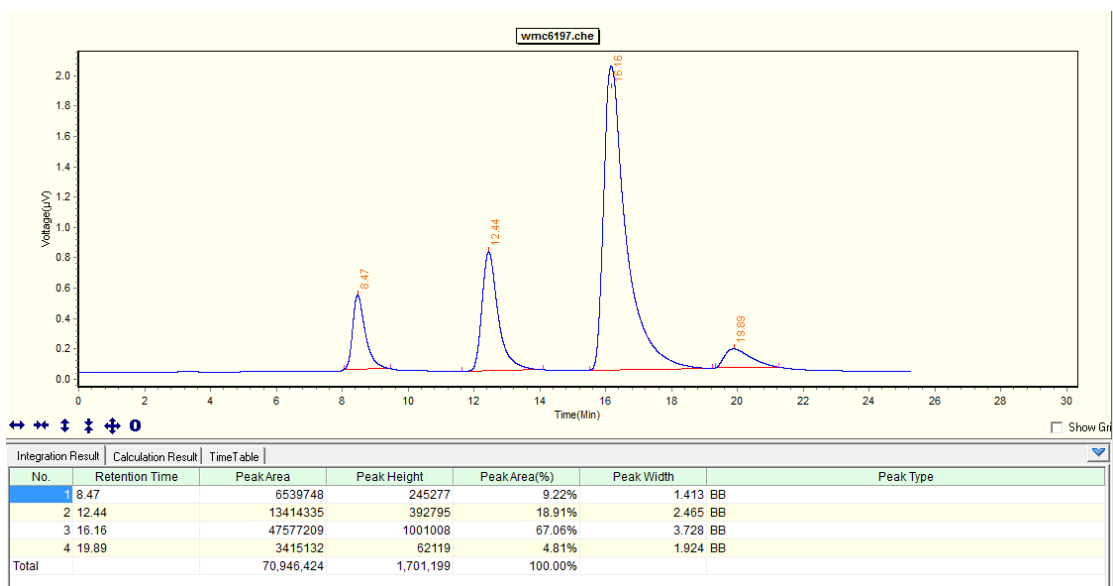

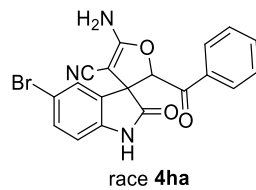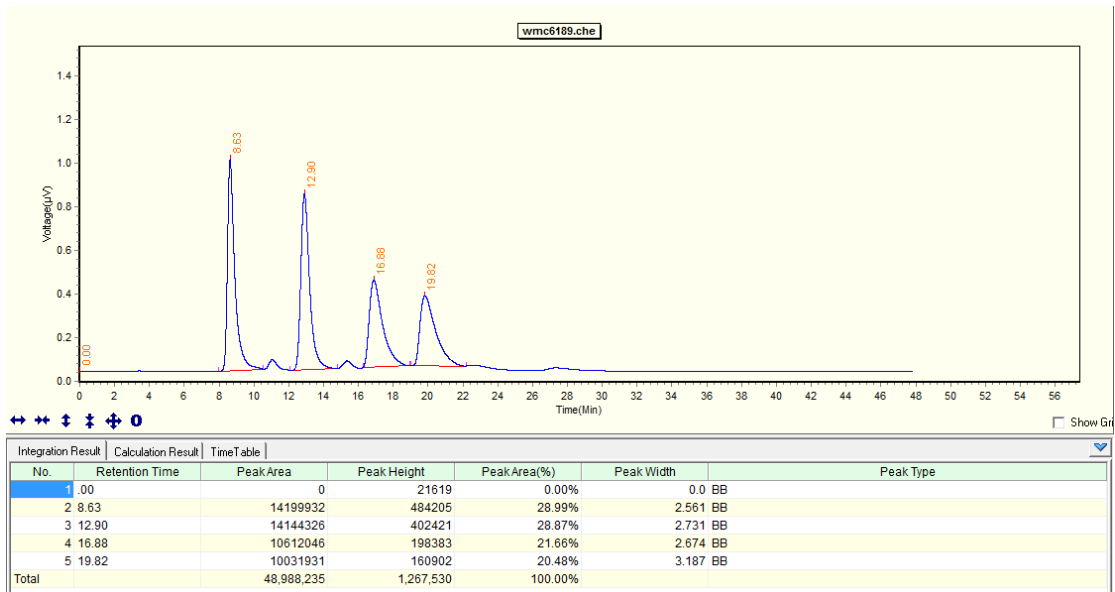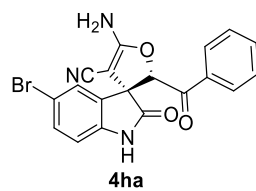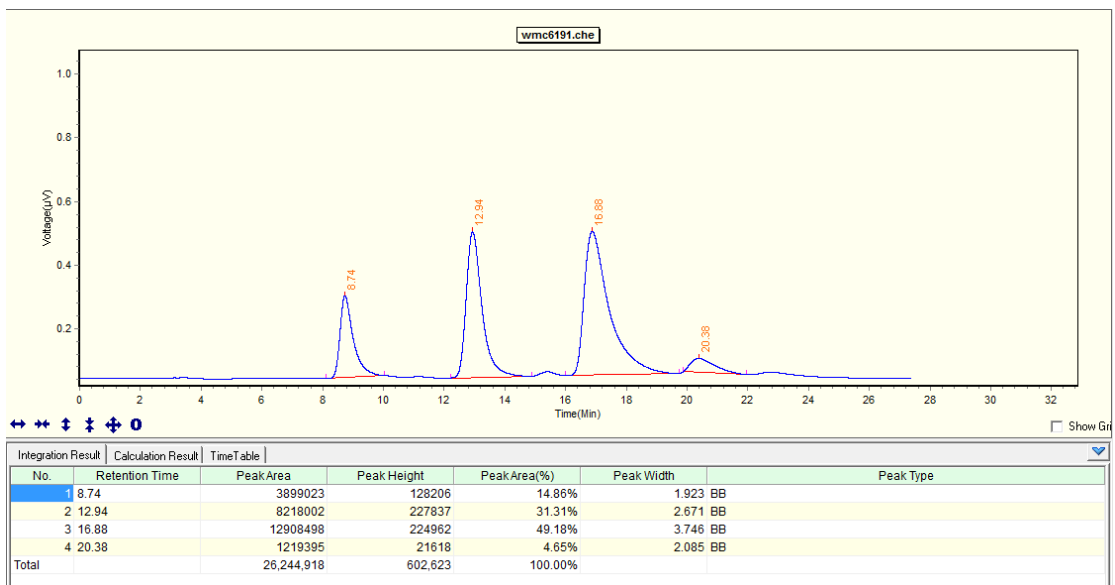

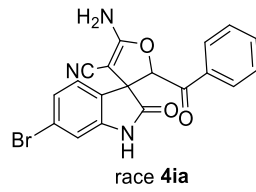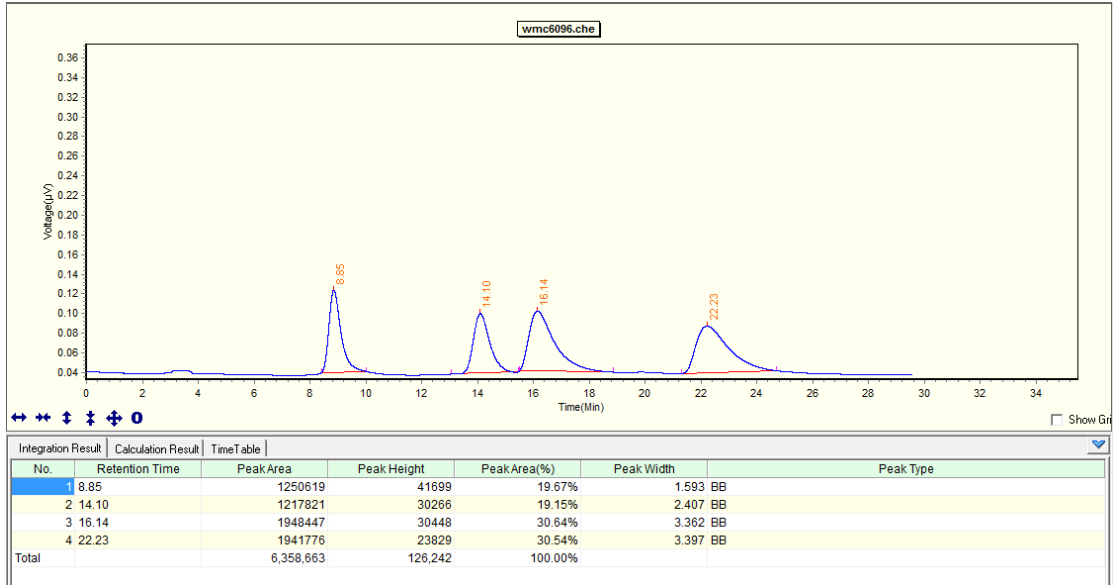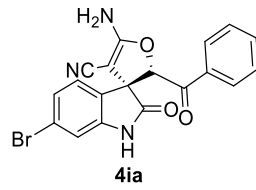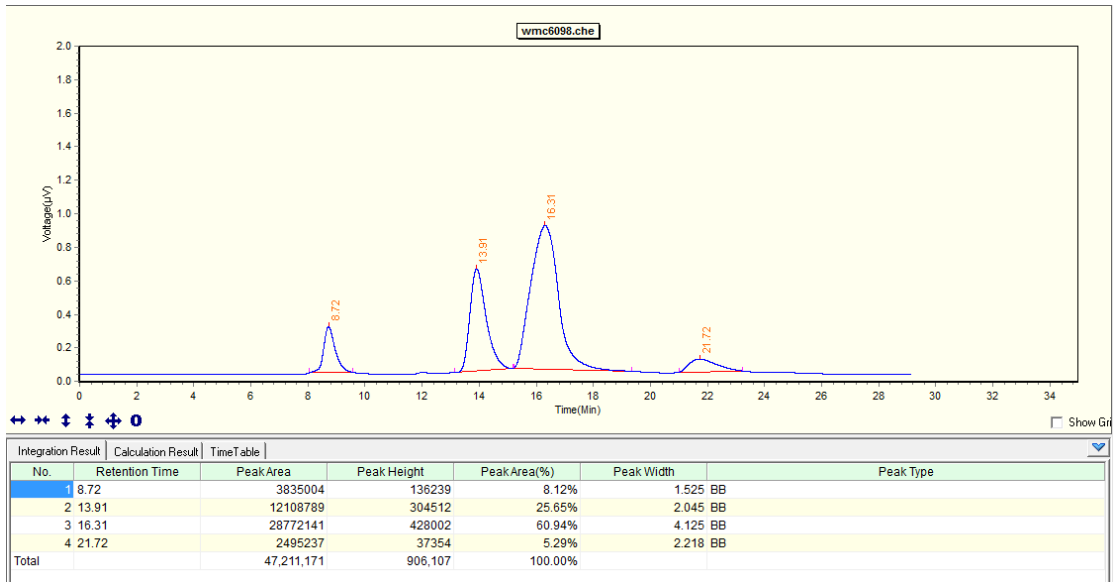

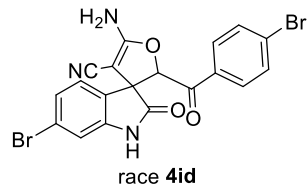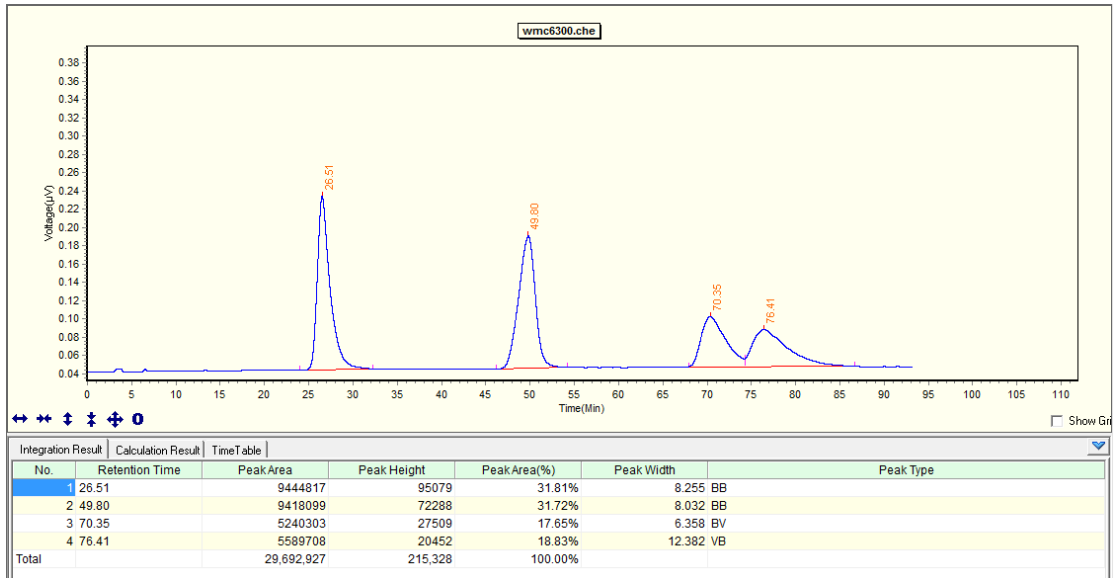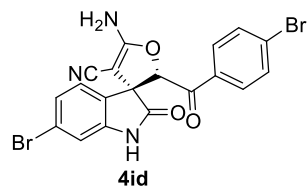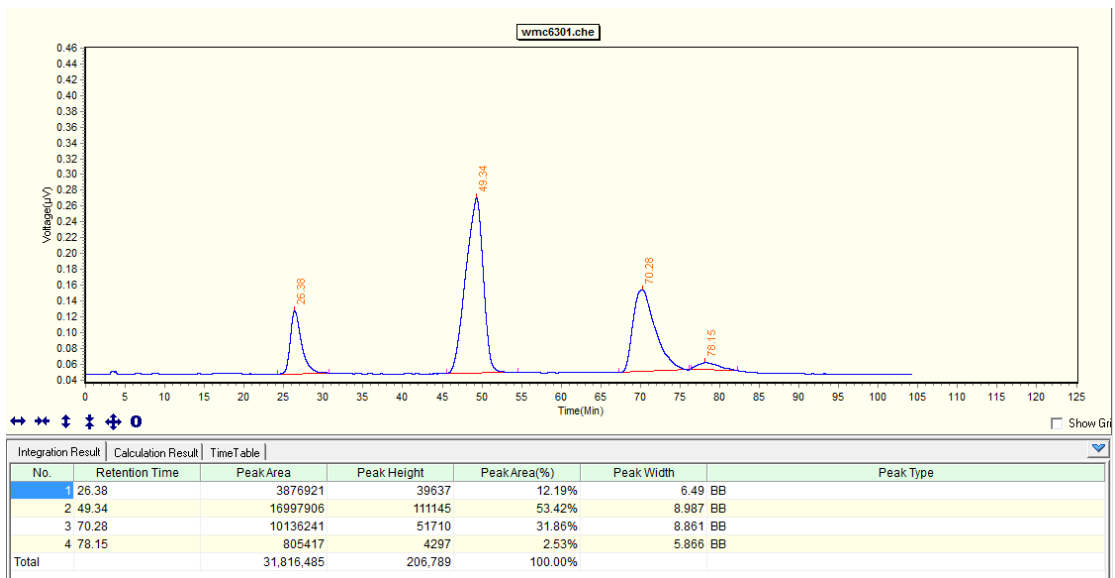



## 2. X-ray crystal structure of 4am

CCDC 1866997

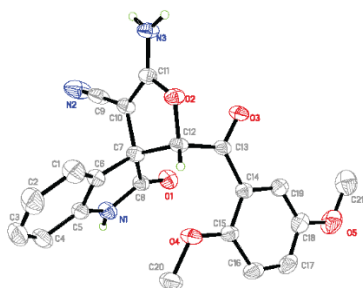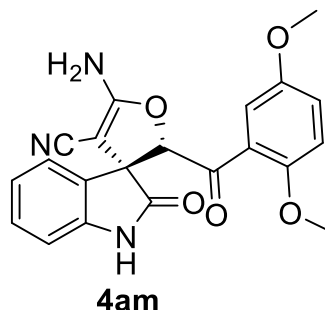

**Table 1 Crystal data and structure refinement for 201807329.**

|                       |                                                                |
|-----------------------|----------------------------------------------------------------|
| Identification code   | 201807329                                                      |
| Empirical formula     | C <sub>46</sub> H <sub>42</sub> N <sub>6</sub> O <sub>11</sub> |
| Formula weight        | 854.85                                                         |
| Temperature/K         | 293(2)                                                         |
| Crystal system        | orthorhombic                                                   |
| Space group           | P2 <sub>1</sub> 2 <sub>1</sub> 2 <sub>1</sub>                  |
| a/Å                   | 14.1242(3)                                                     |
| b/Å                   | 14.3980(3)                                                     |
| c/Å                   | 20.2906(6)                                                     |
| α/°                   | 90                                                             |
| β/°                   | 90                                                             |
| γ/°                   | 90                                                             |
| Volume/Å <sup>3</sup> | 4126.30(18)                                                    |
| Z                     | 4                                                              |

|                                                |                                                               |
|------------------------------------------------|---------------------------------------------------------------|
| $\rho_{\text{calc}}/\text{cm}^3$               | 1.376                                                         |
| $\mu/\text{mm}^{-1}$                           | 0.828                                                         |
| F(000)                                         | 1792.0                                                        |
| Crystal size/ $\text{mm}^3$                    | 0.19 × 0.15 × 0.13                                            |
| Radiation                                      | CuK $\alpha$ ( $\lambda$ = 1.54184)                           |
| 2 $\theta$ range for data collection/ $^\circ$ | 7.528 to 134.082                                              |
| Index ranges                                   | -14 ≤ h ≤ 16, -16 ≤ k ≤ 17, -18 ≤ l ≤ 24                      |
| Reflections collected                          | 15987                                                         |
| Independent reflections                        | 7264 [R <sub>int</sub> = 0.0282, R <sub>sigma</sub> = 0.0380] |
| Data/restraints/parameters                     | 7264/0/573                                                    |
| Goodness-of-fit on F <sup>2</sup>              | 1.046                                                         |
| Final R indexes [I ≥ 2 $\sigma$ (I)]           | R <sub>1</sub> = 0.0522, wR <sub>2</sub> = 0.1394             |
| Final R indexes [all data]                     | R <sub>1</sub> = 0.0613, wR <sub>2</sub> = 0.1481             |
| Largest diff. peak/hole / e Å <sup>-3</sup>    | 0.38/-0.22                                                    |
| Flack parameter                                | -0.06(12)                                                     |

### 3. HRMS spectra of compounds

#### HRMS spectra of Compound 4aa

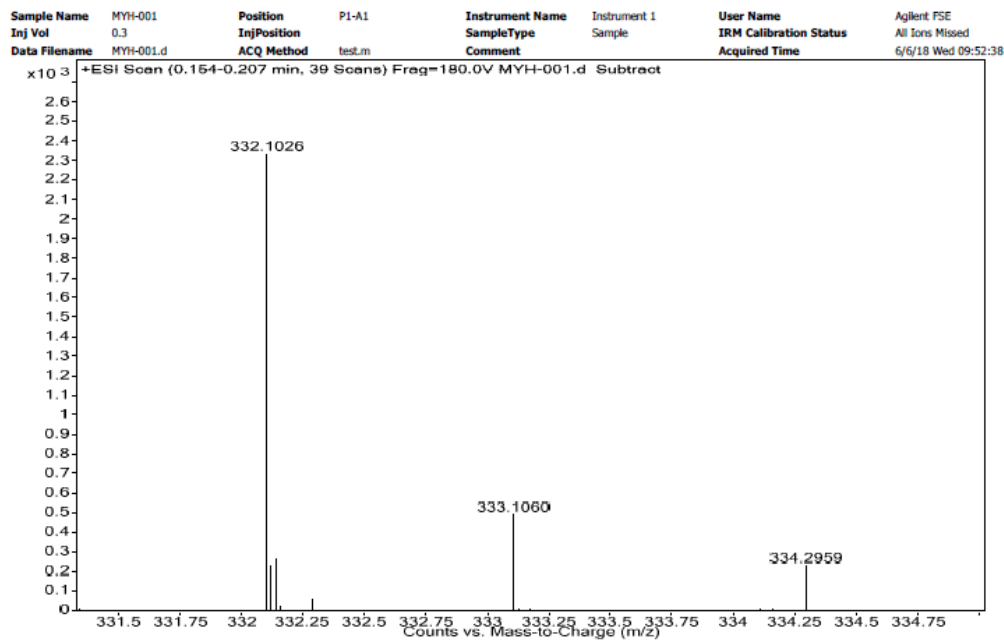

#### HRMS spectra of Compound 4ba

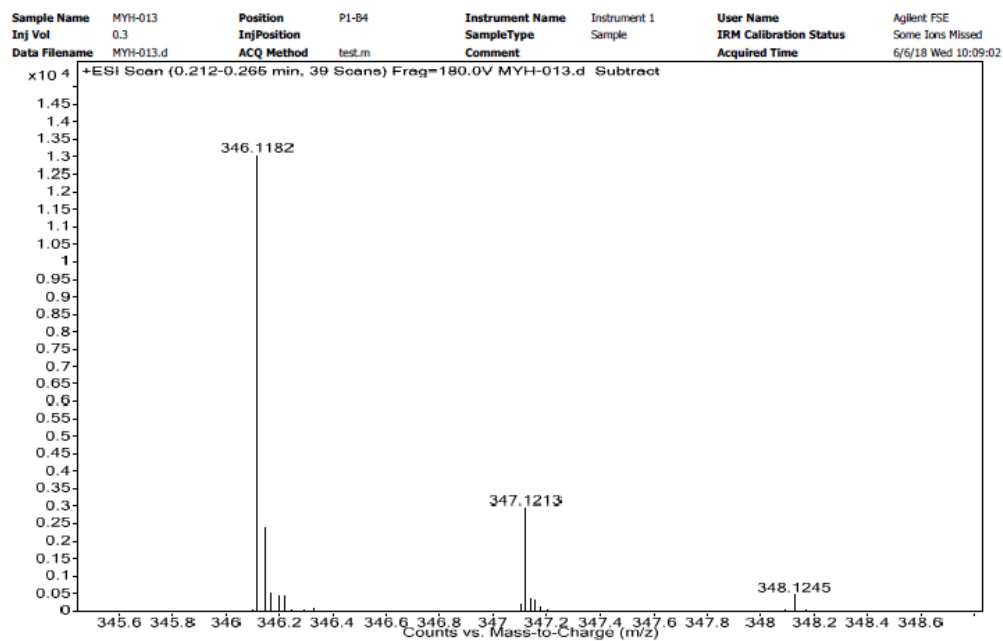

## HRMS spectra of Compound 4ca

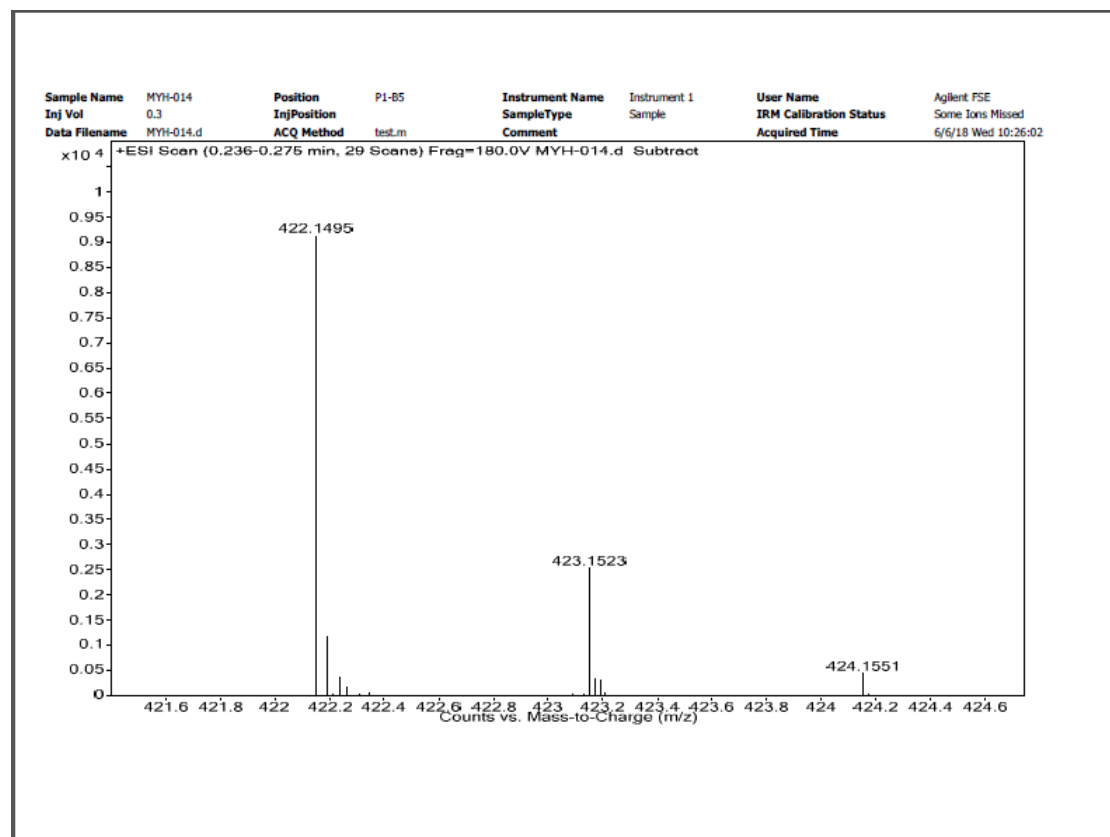

## HRMS spectra of Compound 4ab

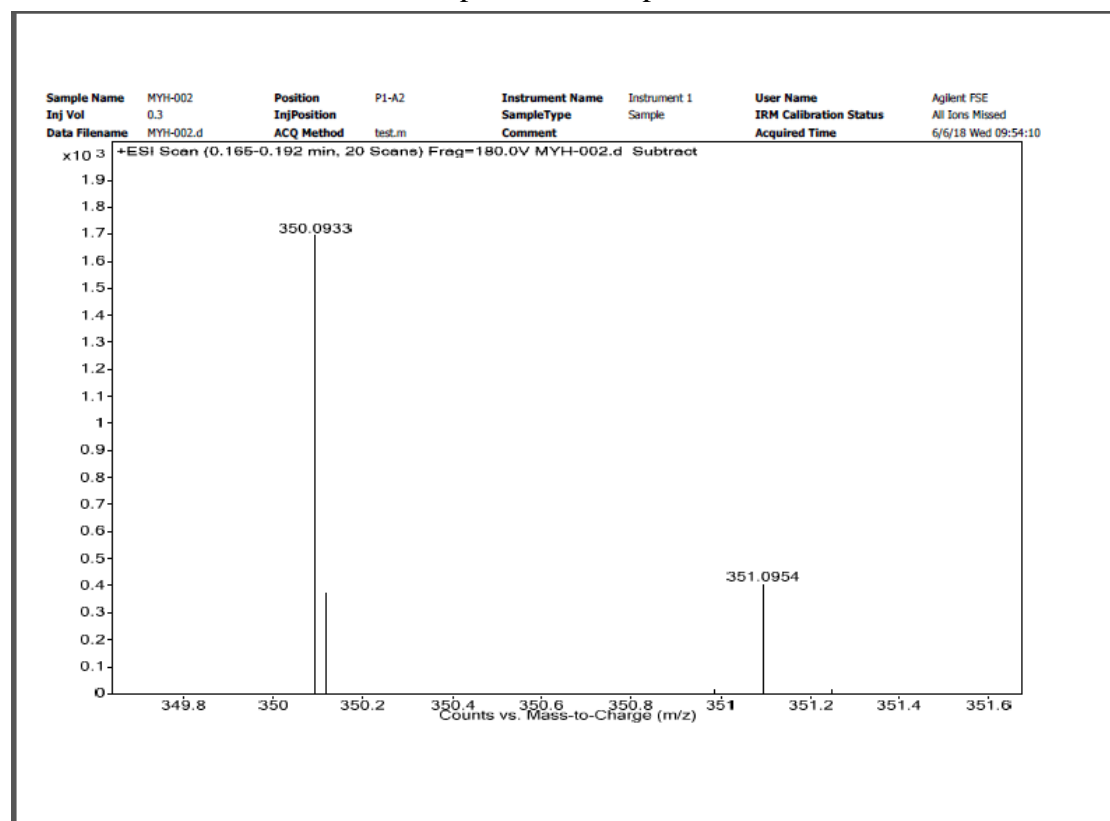

## HRMS spectra of Compound 4ac

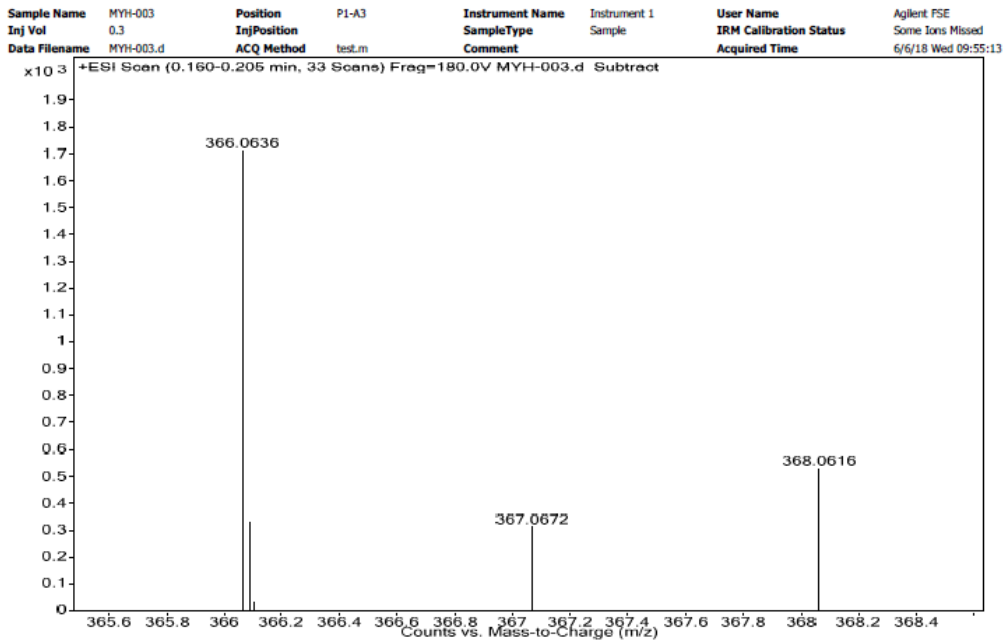

## HRMS spectra of Compound 4ad

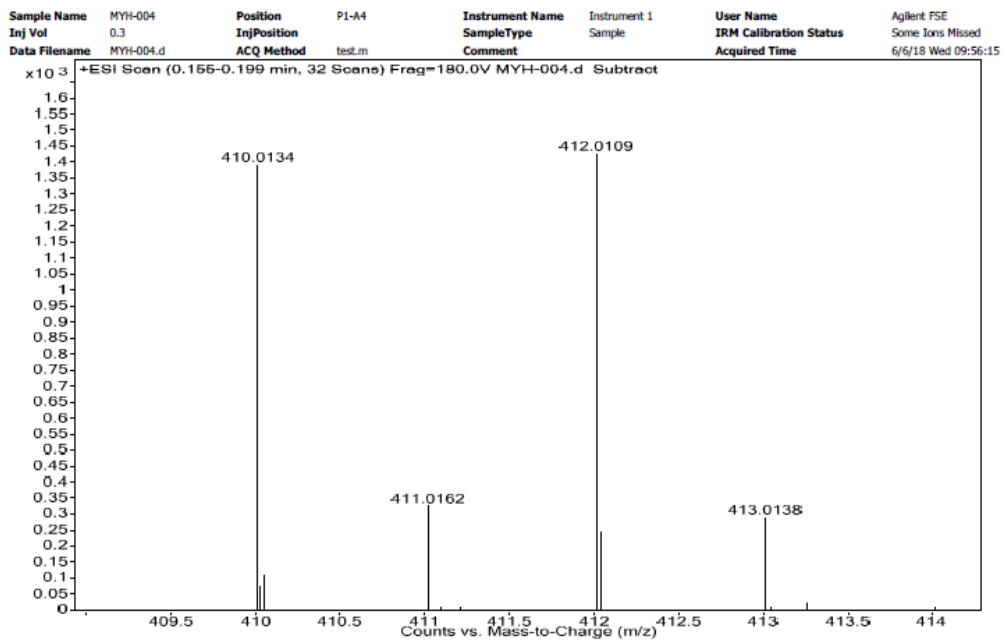

## HRMS spectra of Compound 4ae

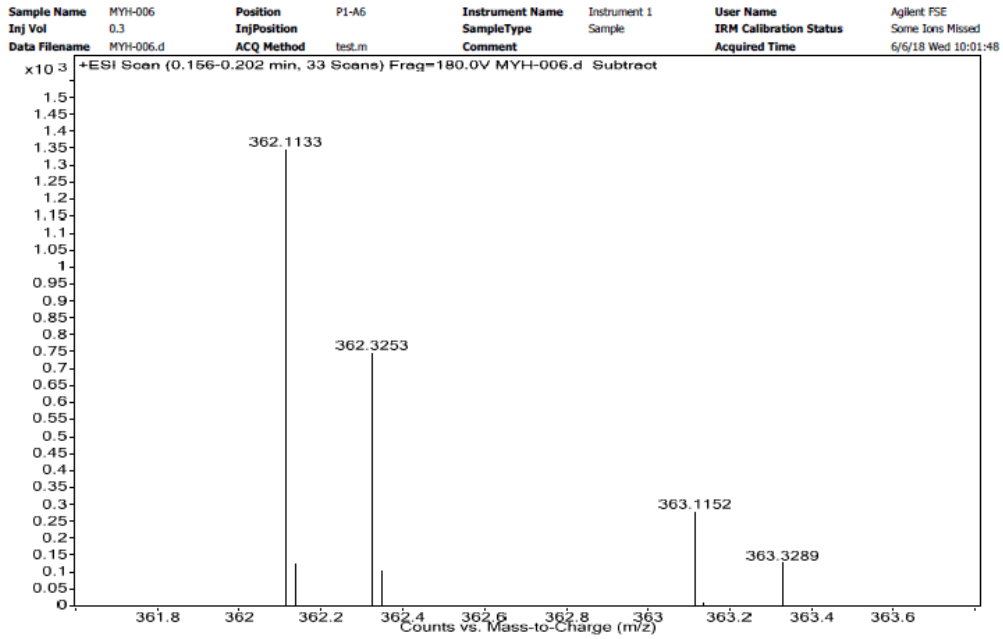

## HRMS spectra of Compound 4af

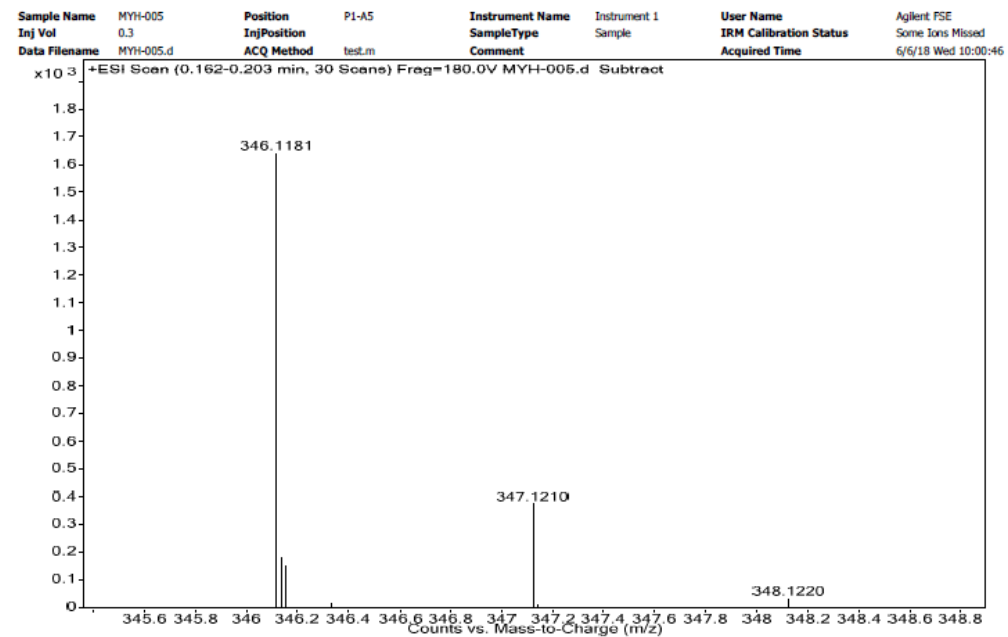

## HRMS spectra of Compound 4ag

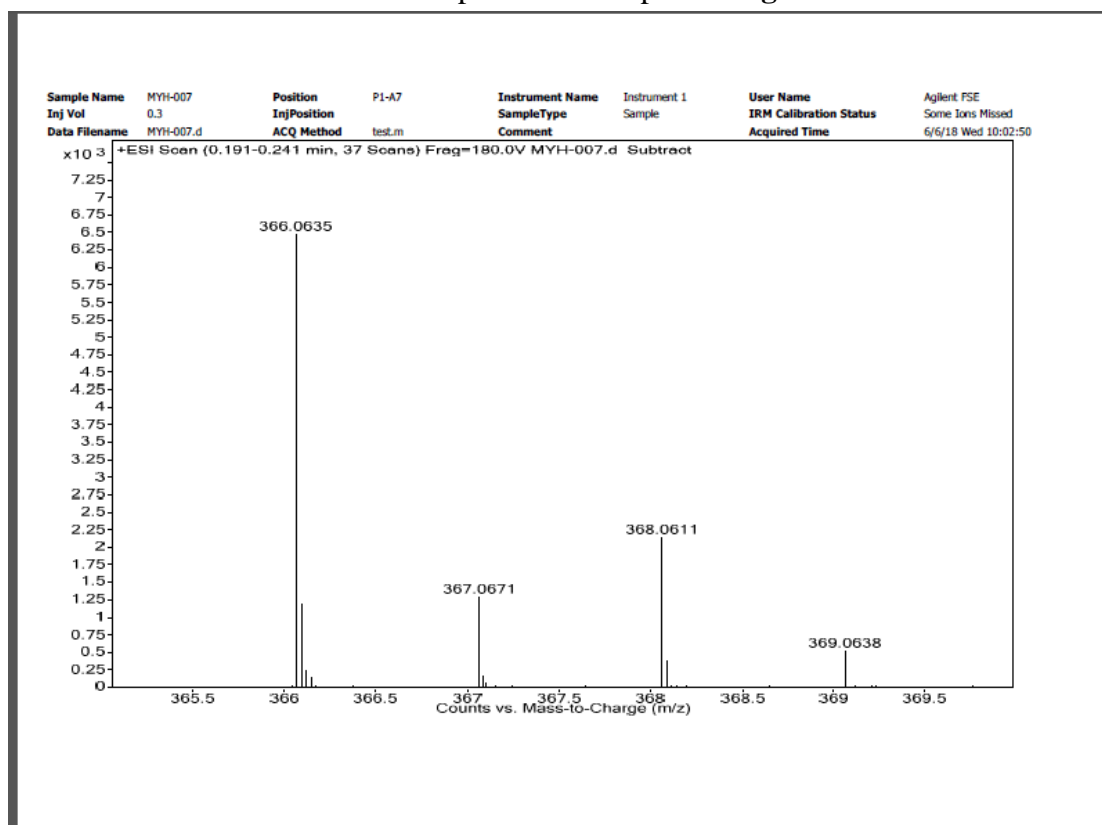

## HRMS spectra of Compound 4ah

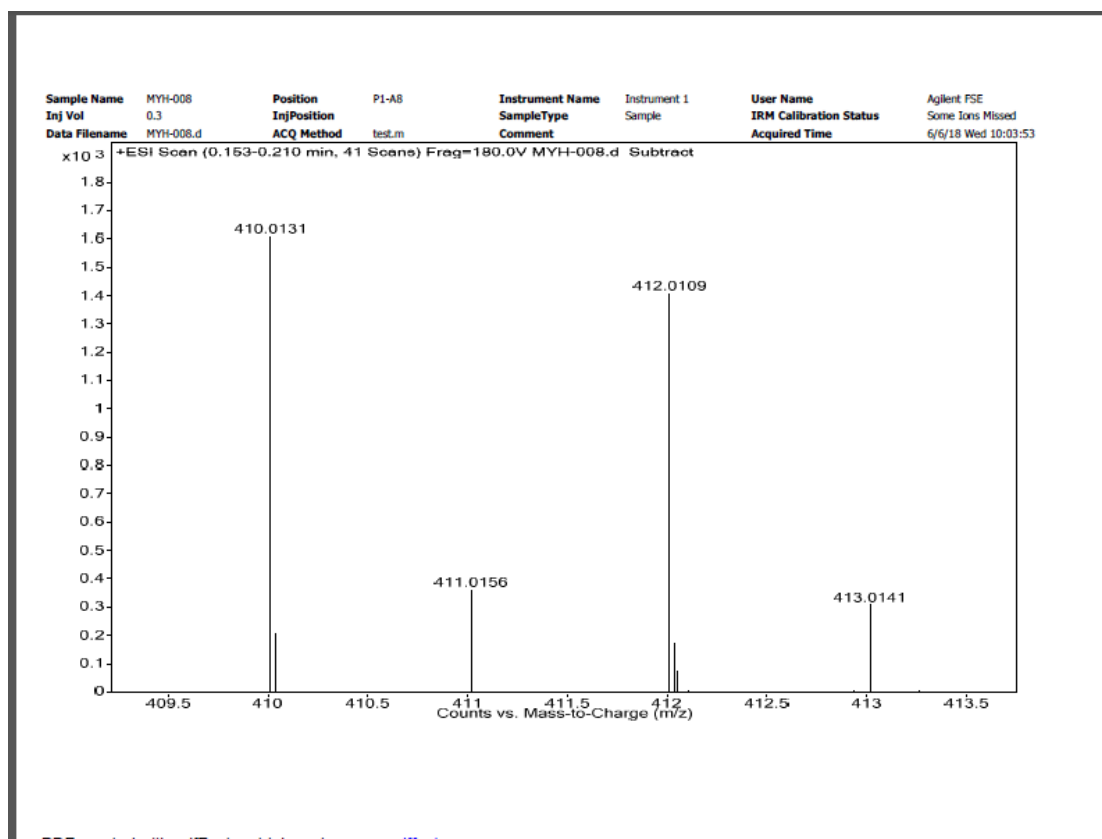

## HRMS spectra of Compound 4ai

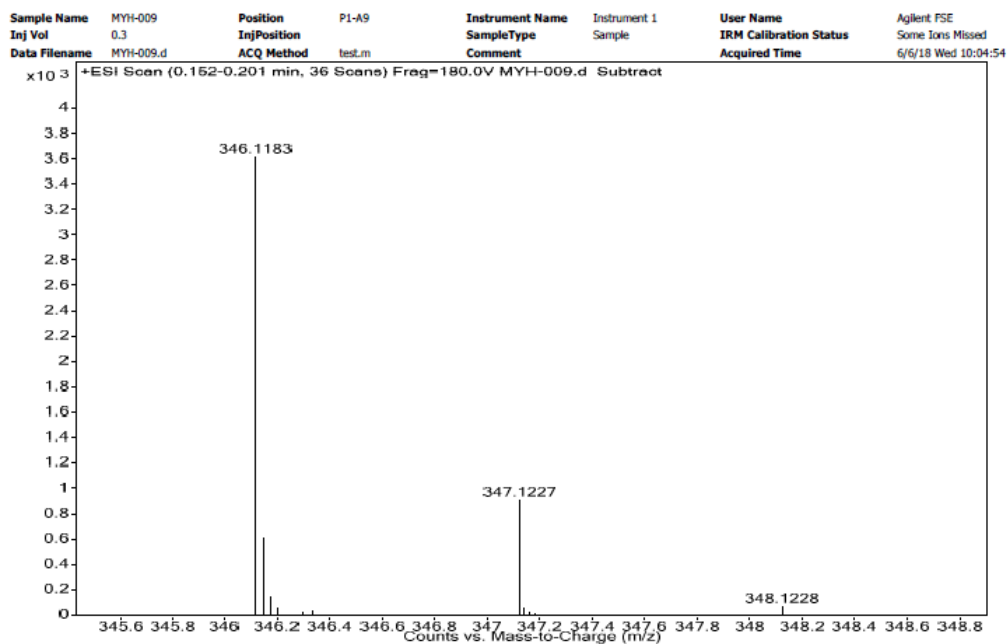

## HRMS spectra of Compound 4aj

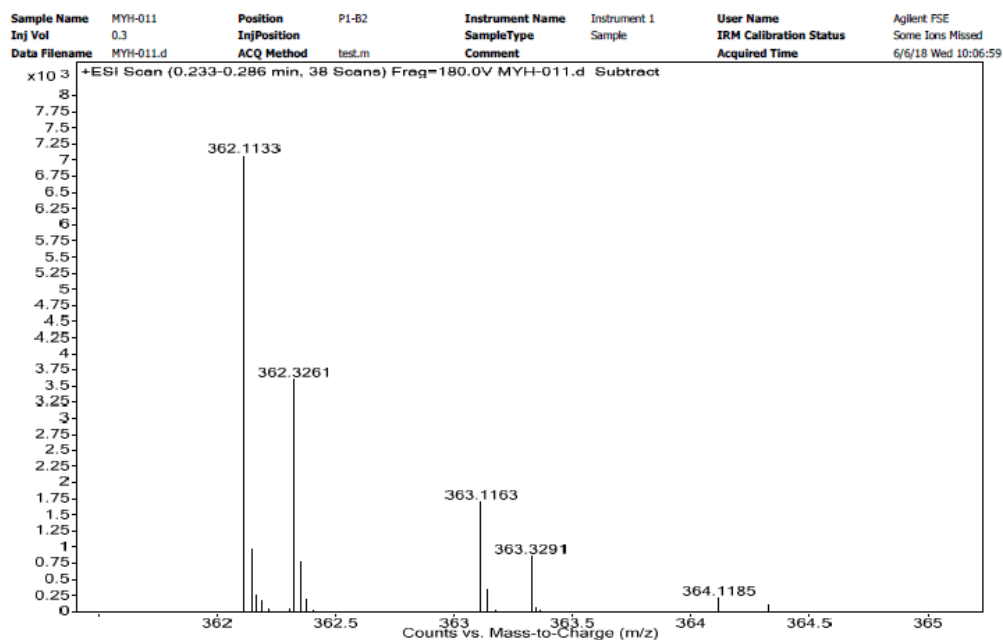



## HRMS spectra of Compound 4ak

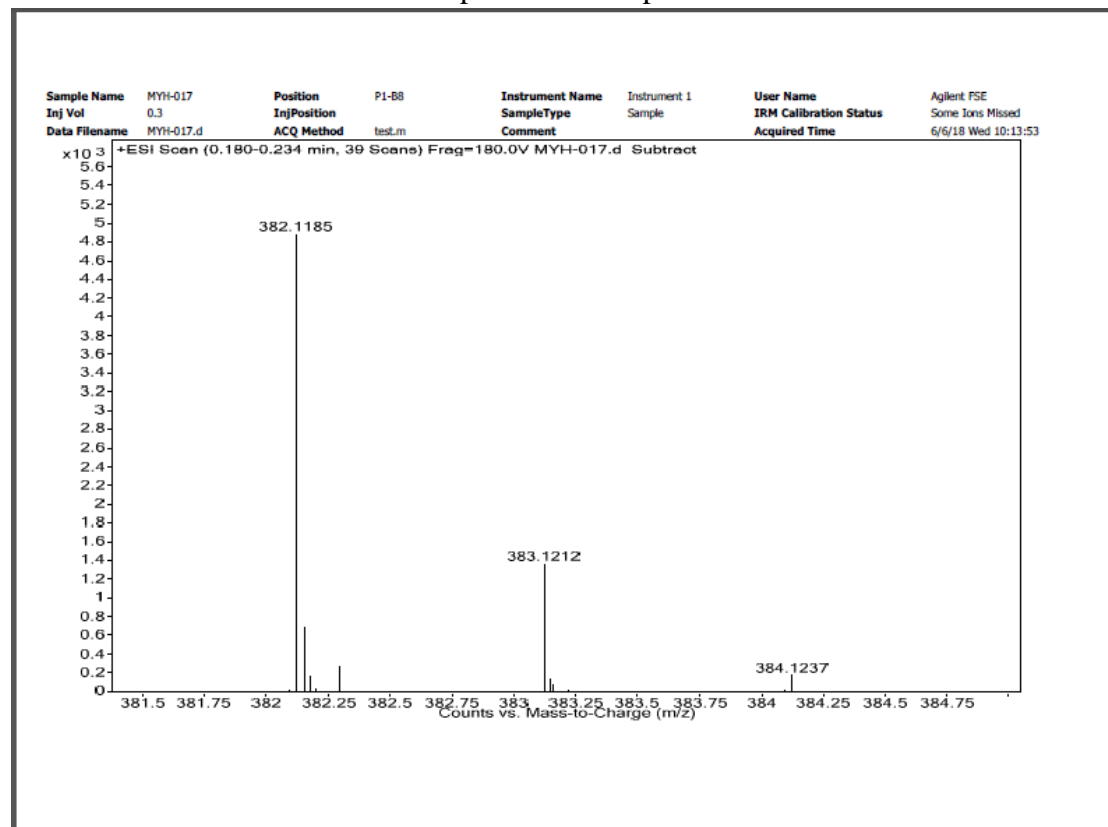

## HRMS spectra of Compound 4al

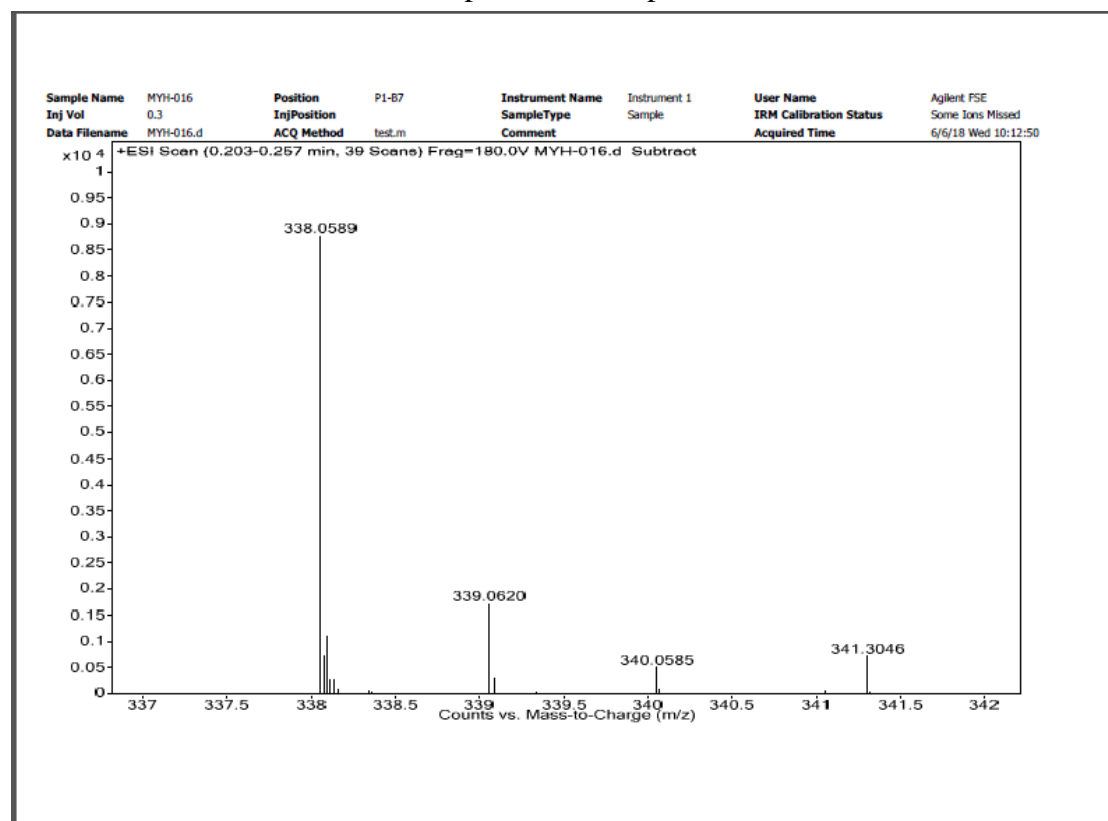

## HRMS spectra of Compound 4am

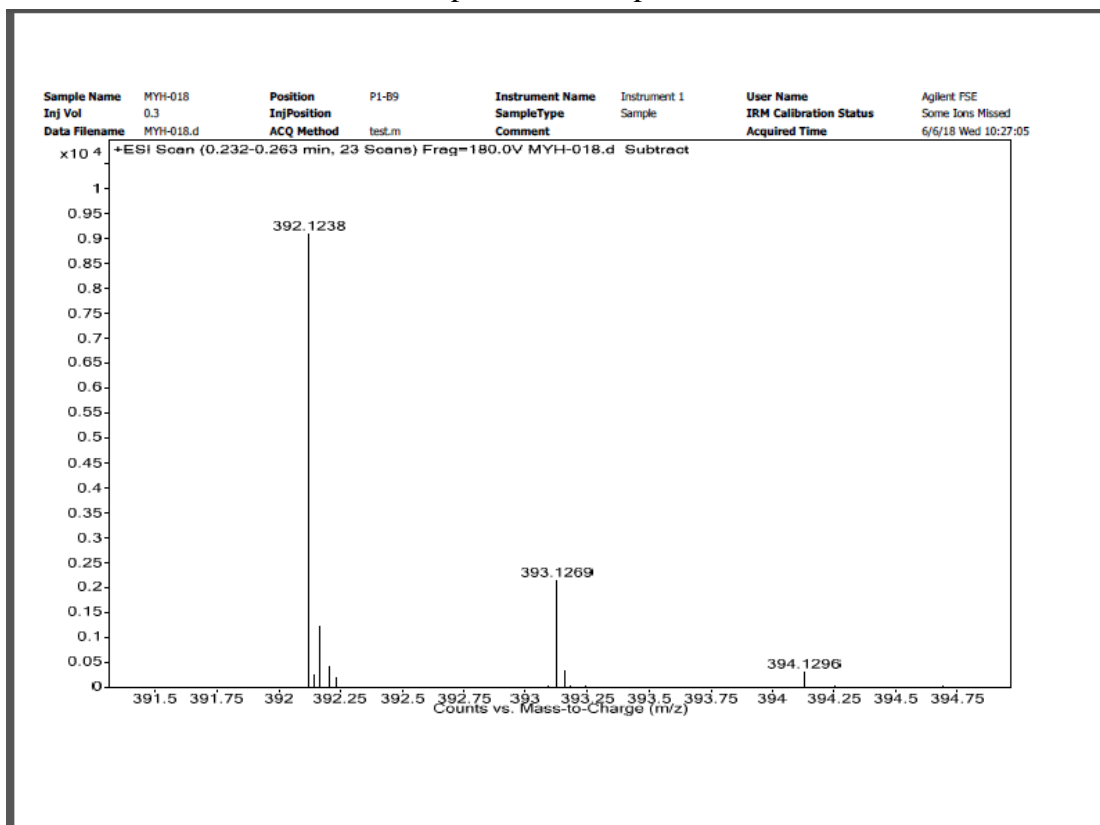

## HRMS spectra of Compound 4an

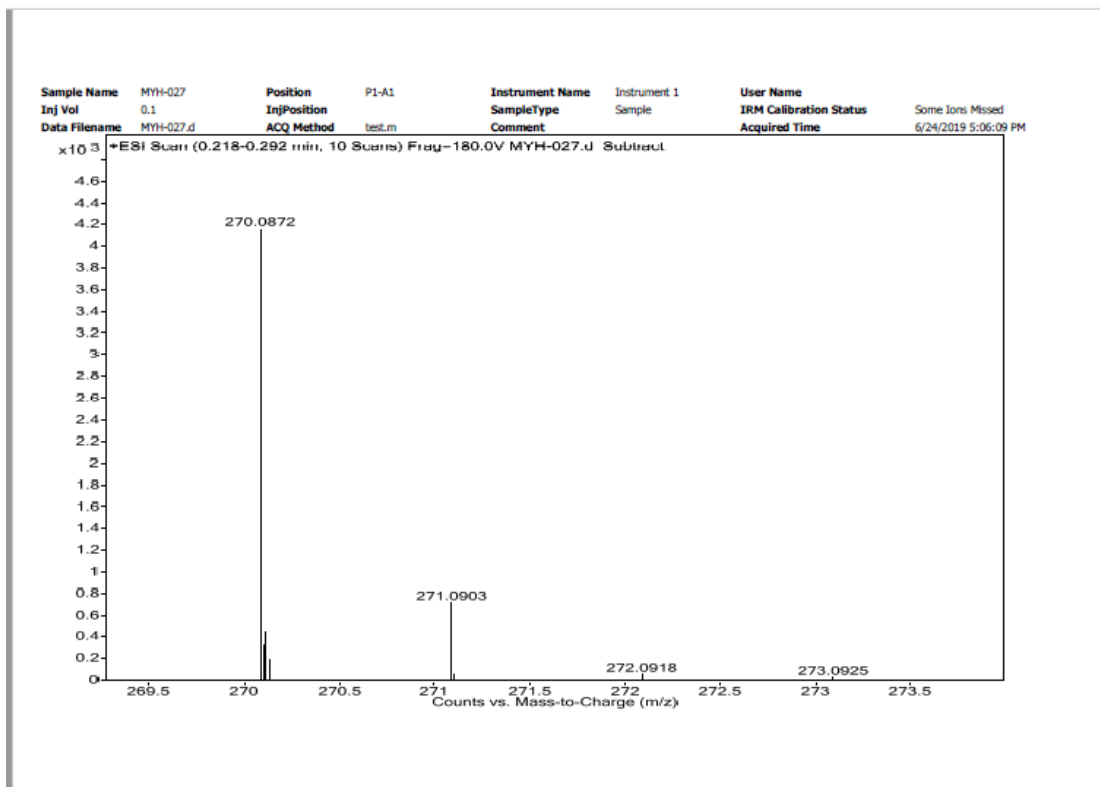

## HRMS spectra of Compound 4da

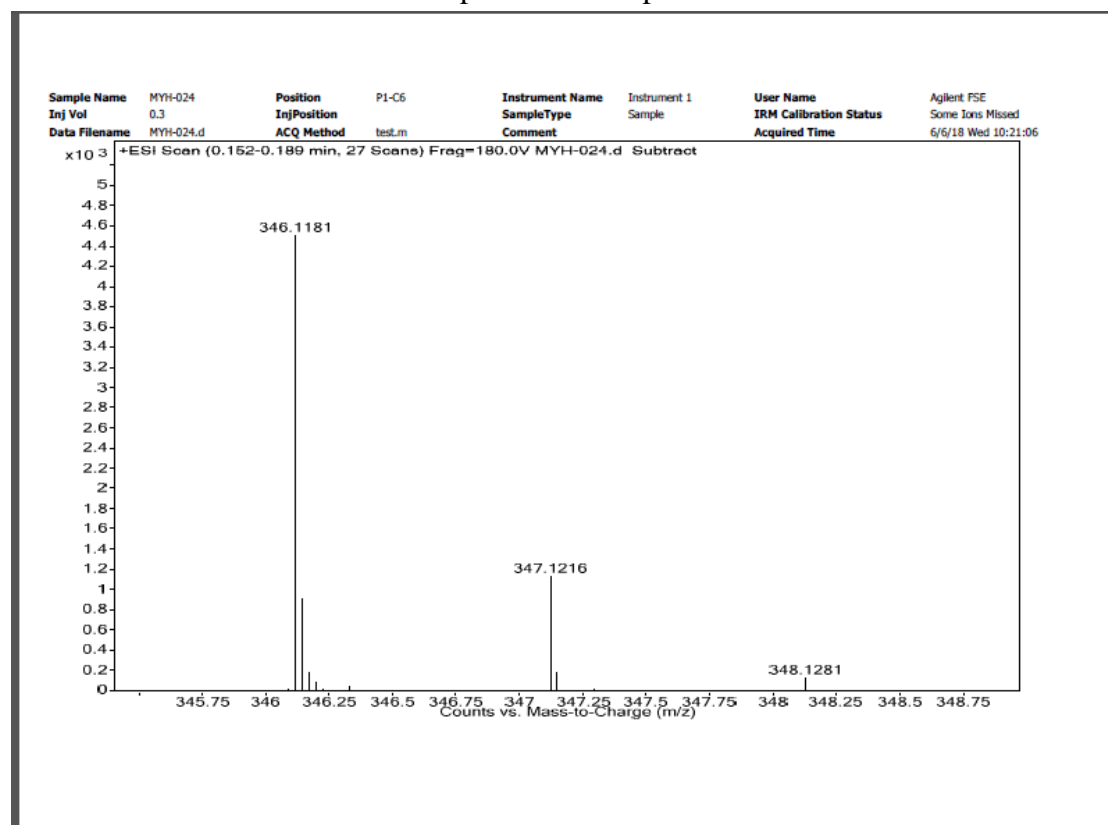

## HRMS spectra of Compound 4ea

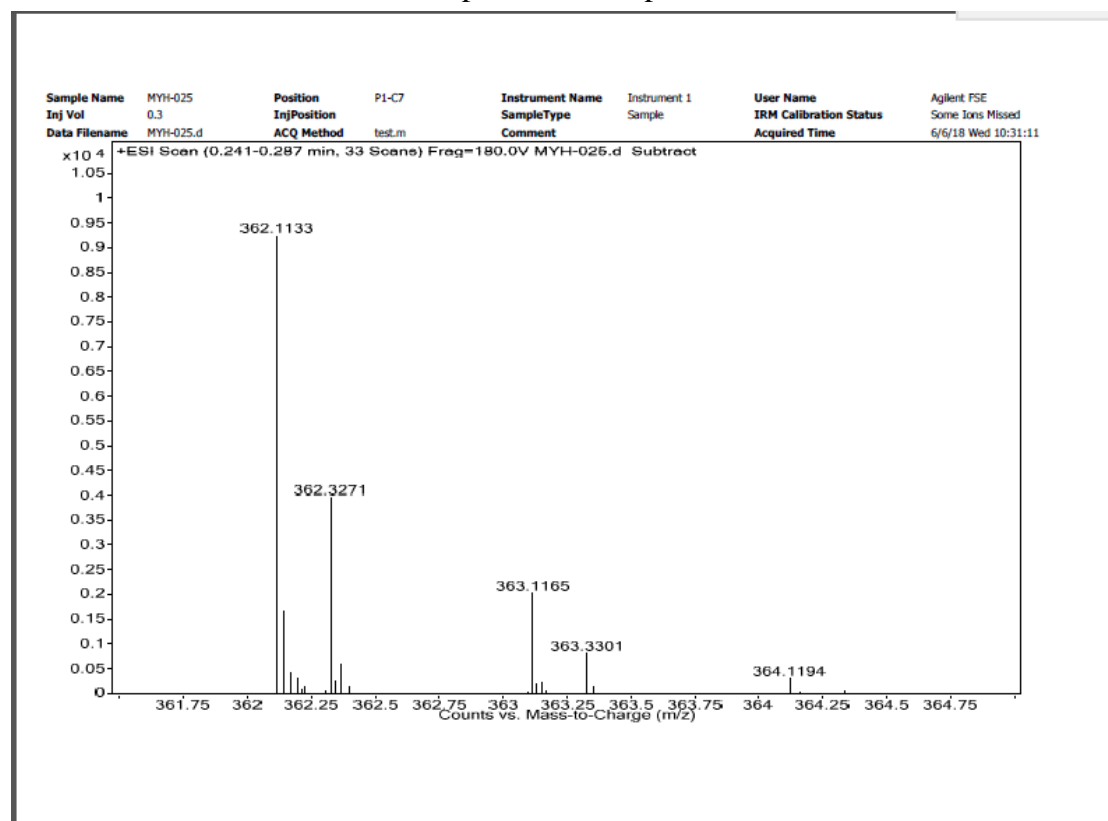

## HRMS spectra of Compound 4fa

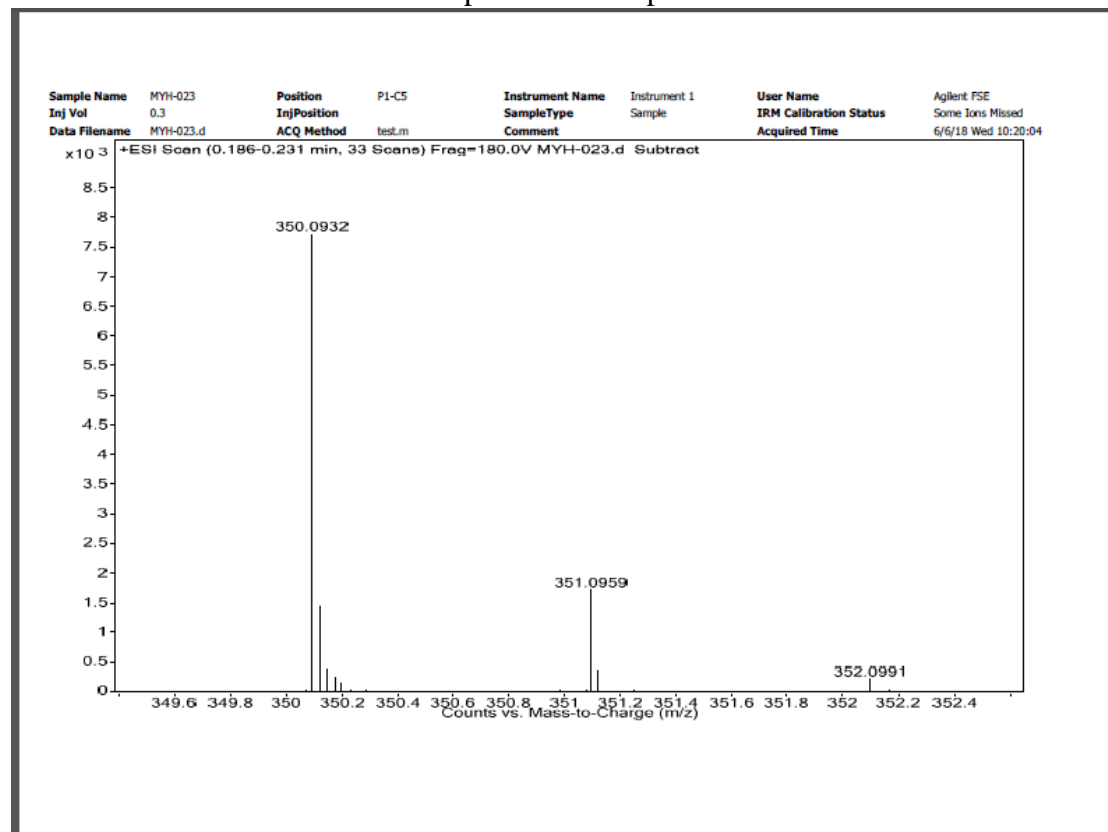

## HRMS spectra of Compound 4ga

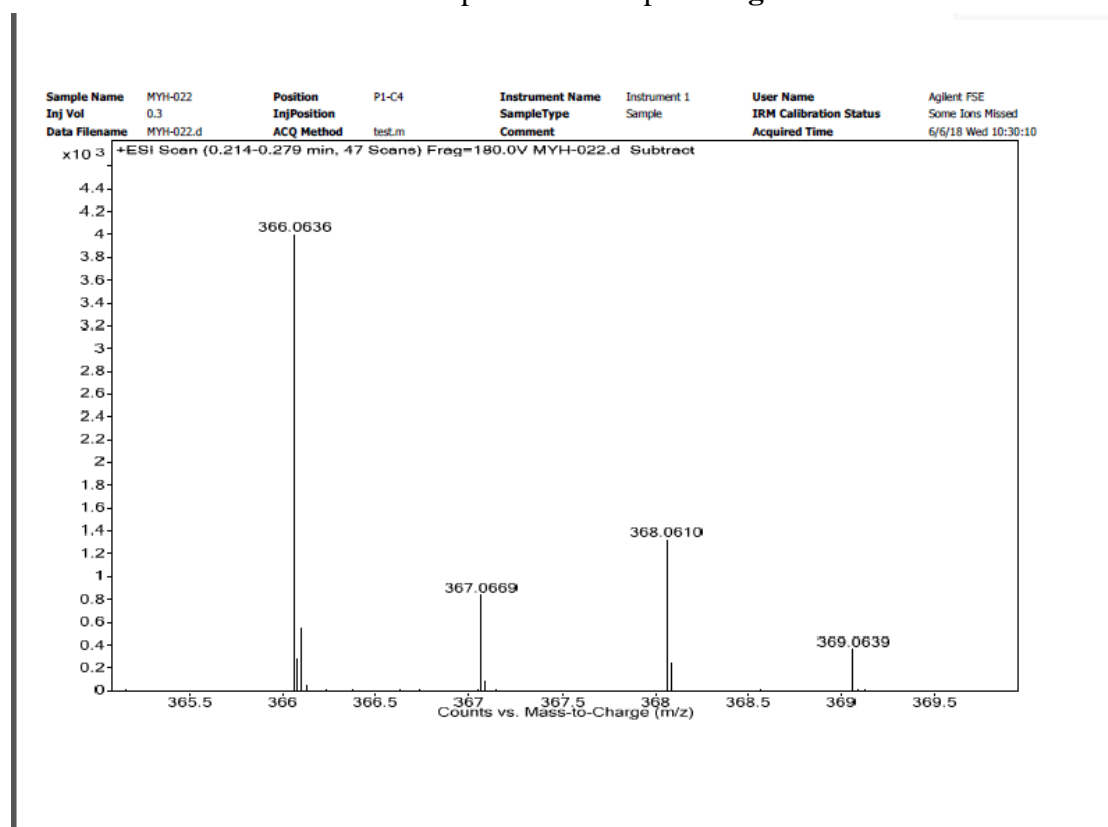

## HRMS spectra of Compound 4ha

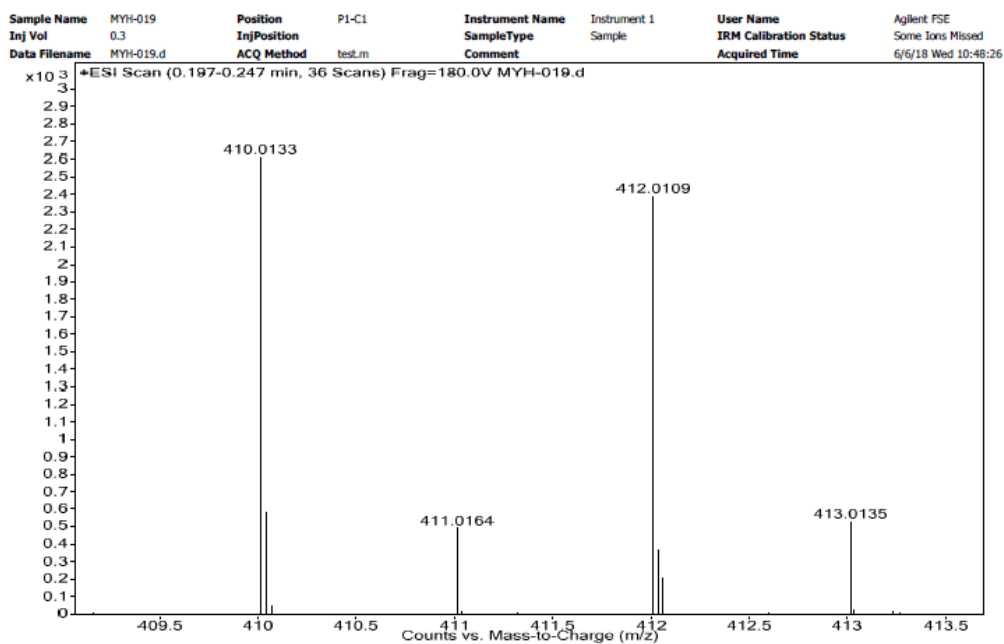

## HRMS spectra of Compound 4ia

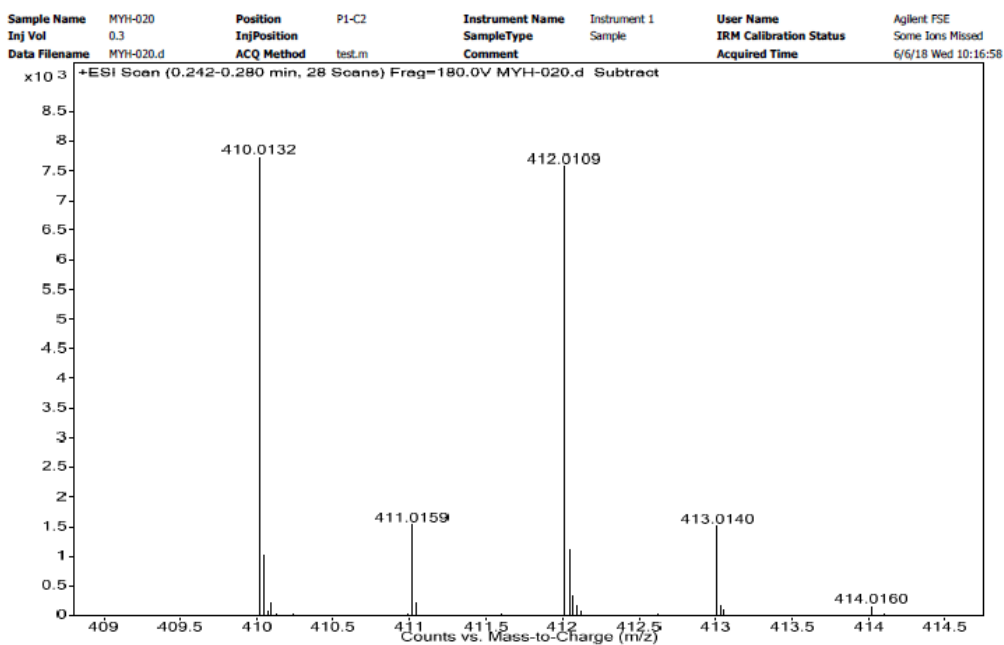

# HRMS spectra of Compound 4id

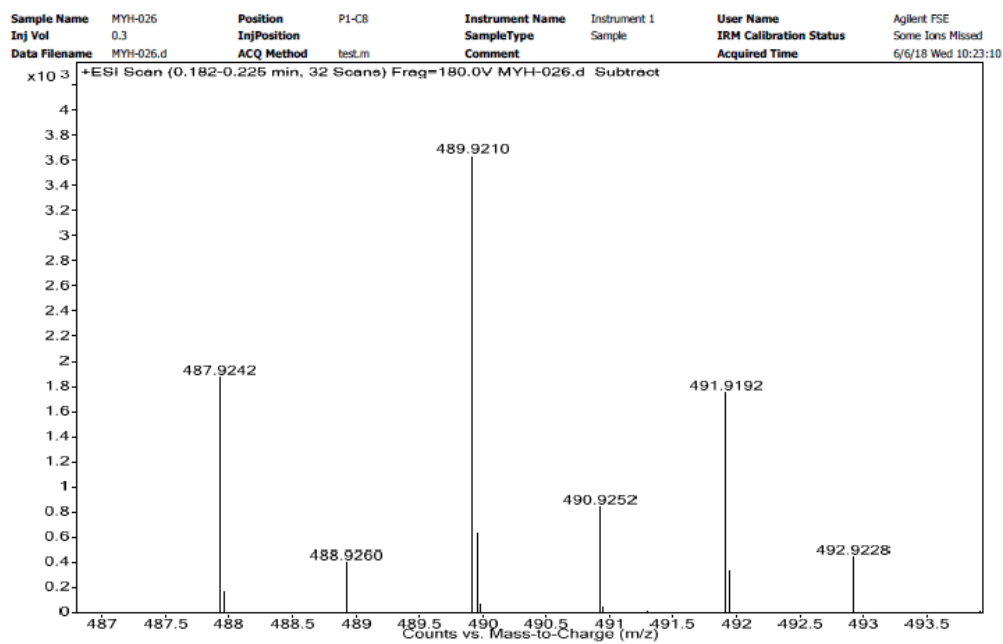

## 4. NMR Spectra of compounds

$^1\text{H}$  NMR spectrum of compound **4aa** ( $(\text{CD}_3)_2\text{SO}$ , 400 MHz)

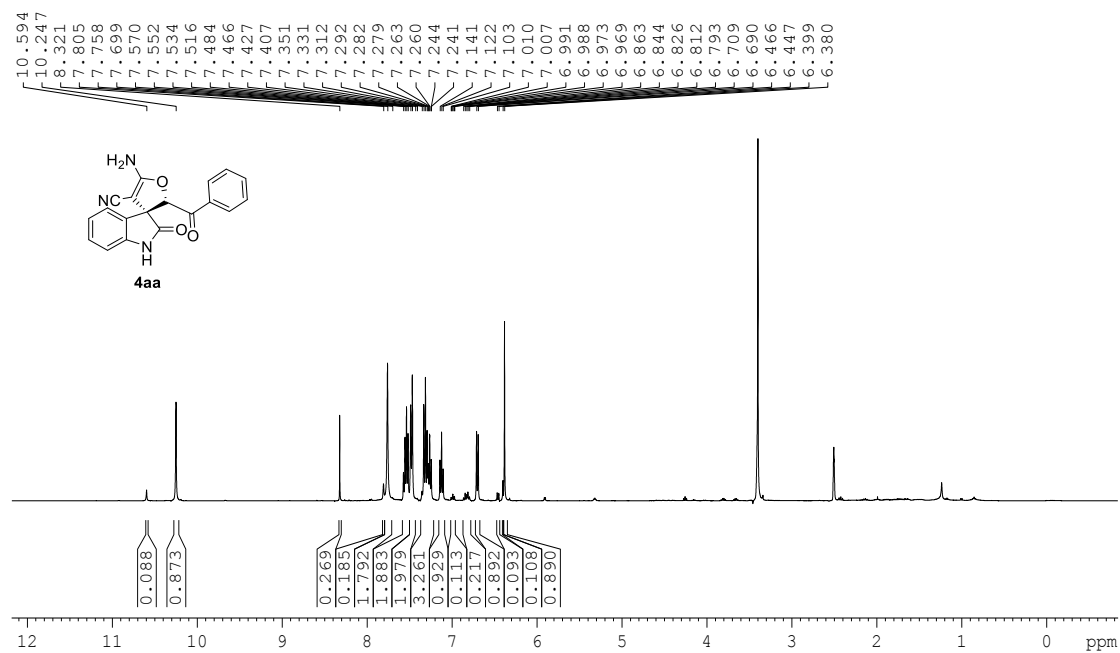

$^{13}\text{C}$  NMR spectrum of compound **4aa** ( $(\text{CD}_3)_2\text{SO}$ , 100 MHz)

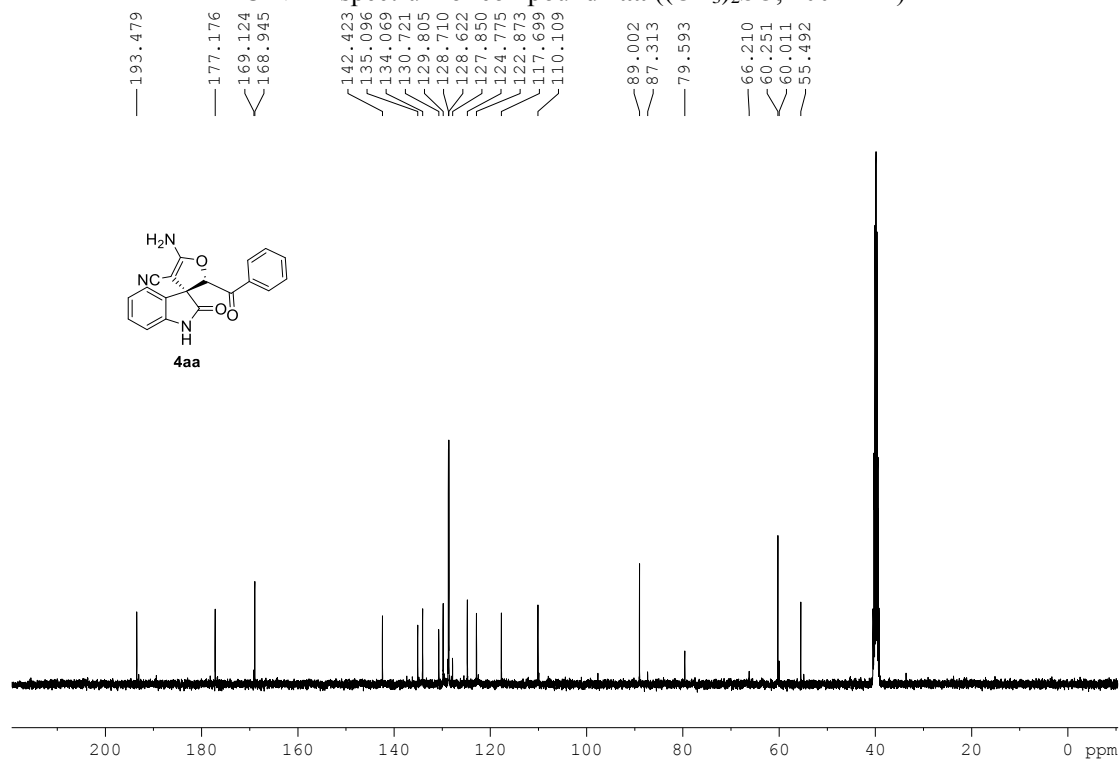

<sup>1</sup>H NMR spectrum of compound **4ba** ((CD<sub>3</sub>)<sub>2</sub>SO, 400 MHz)

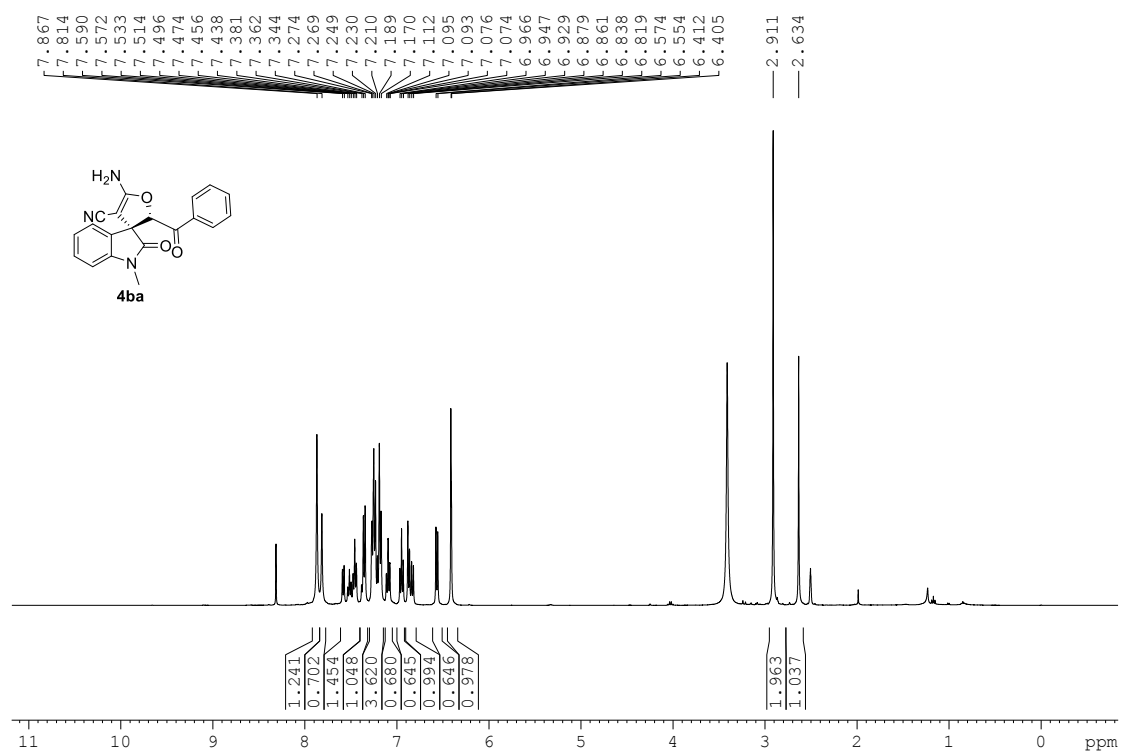

<sup>13</sup>C NMR spectrum of compound **4ba** ((CD<sub>3</sub>)<sub>2</sub>SO, 100 MHz)

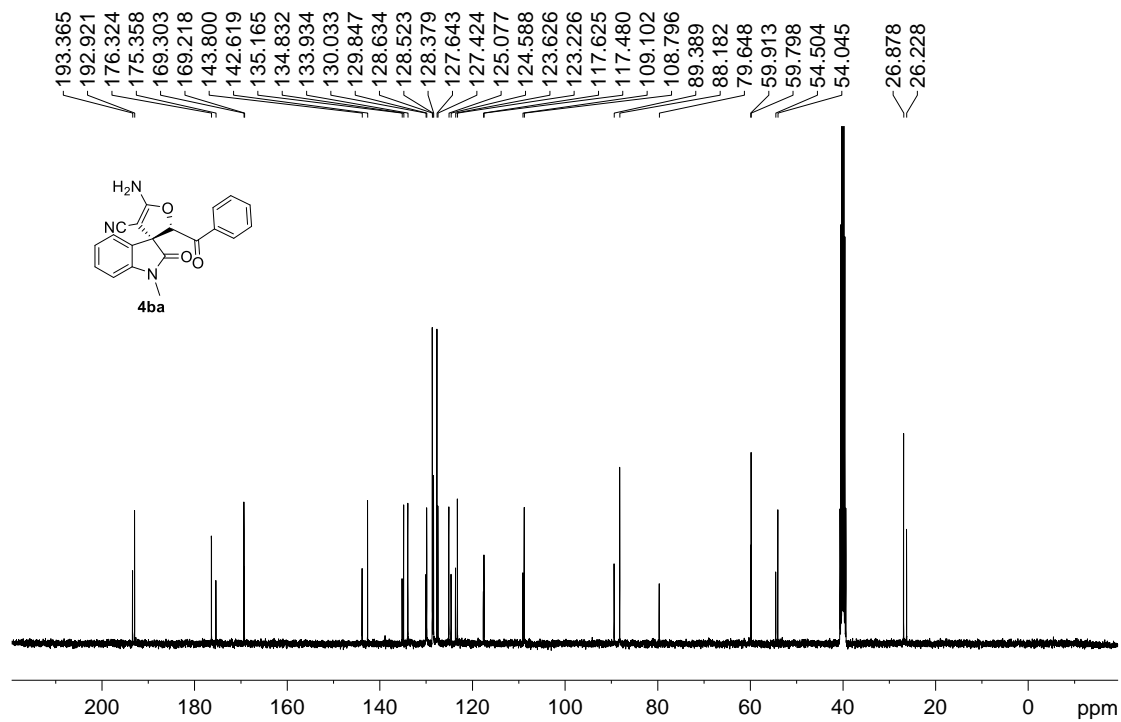



<sup>1</sup>H NMR spectrum of compound **4ca** ((CD<sub>3</sub>)<sub>2</sub>SO, 400 MHz)

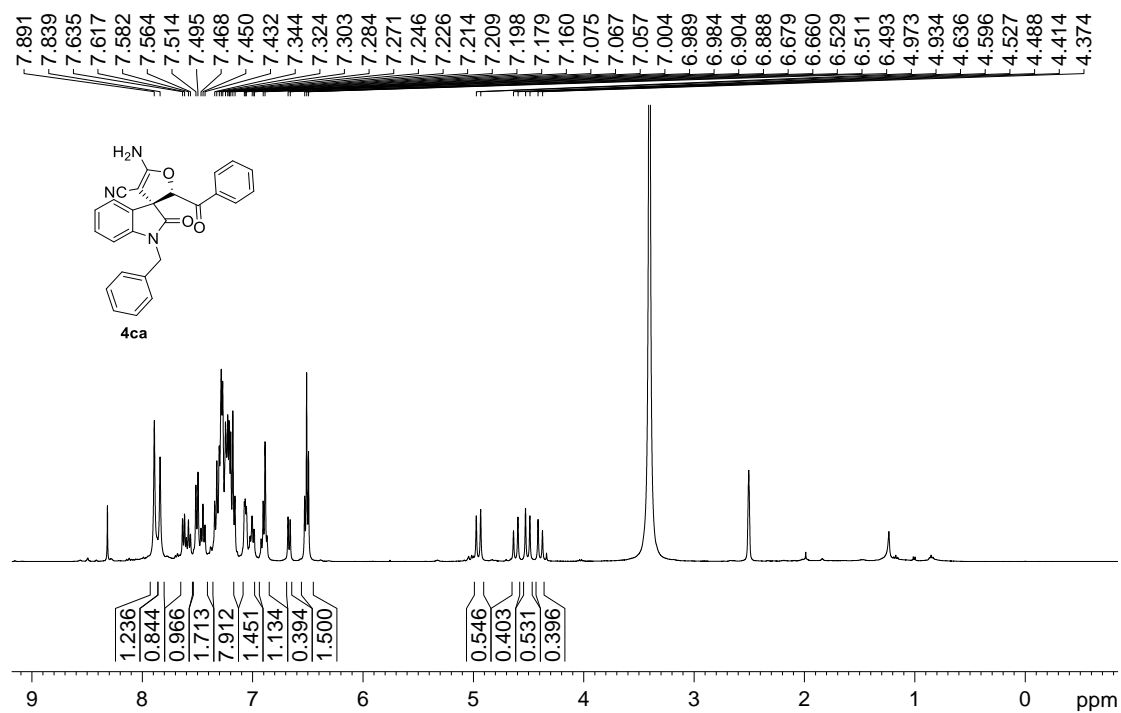

<sup>13</sup>C NMR spectrum of compound **4ca** ((CD<sub>3</sub>)<sub>2</sub>SO, 100 MHz)

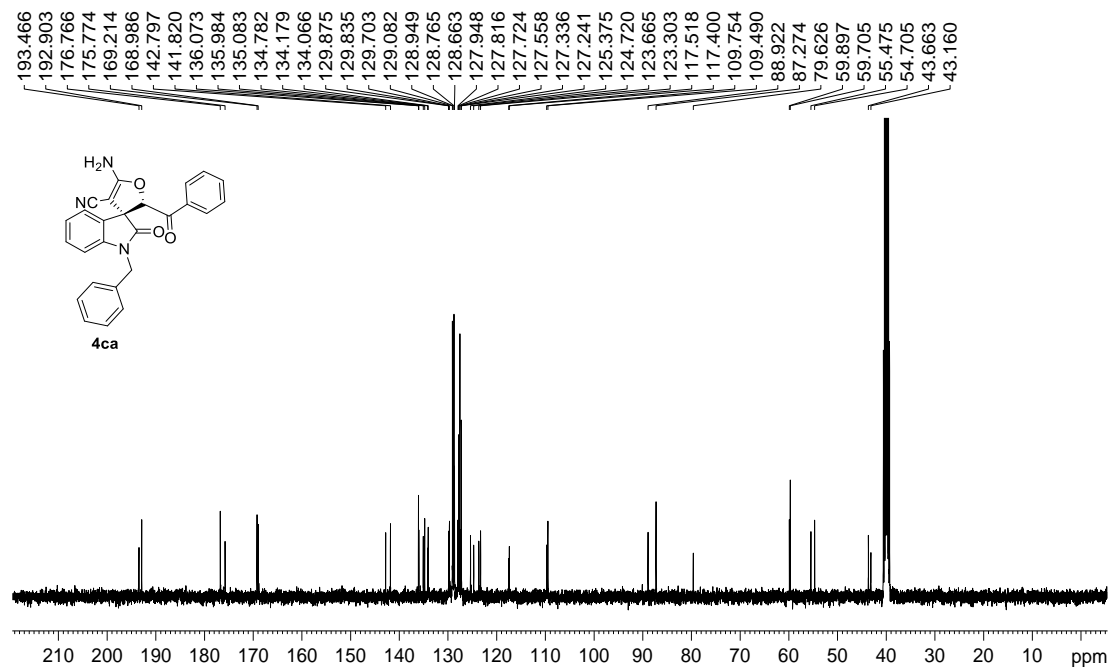

<sup>1</sup>H NMR spectrum of compound **4ab** ((CD<sub>3</sub>)<sub>2</sub>SO, 400 MHz)

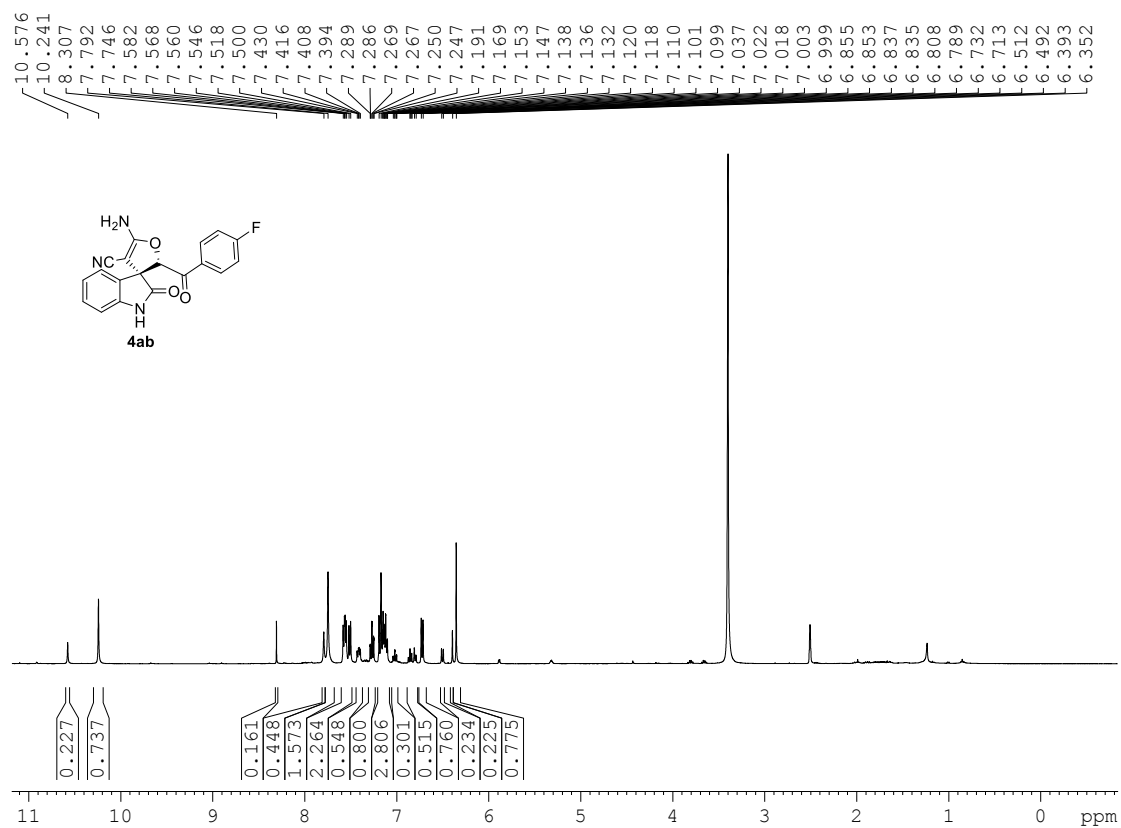

<sup>13</sup>C NMR spectrum of compound **4ab** ((CD<sub>3</sub>)<sub>2</sub>SO, 100 MHz)

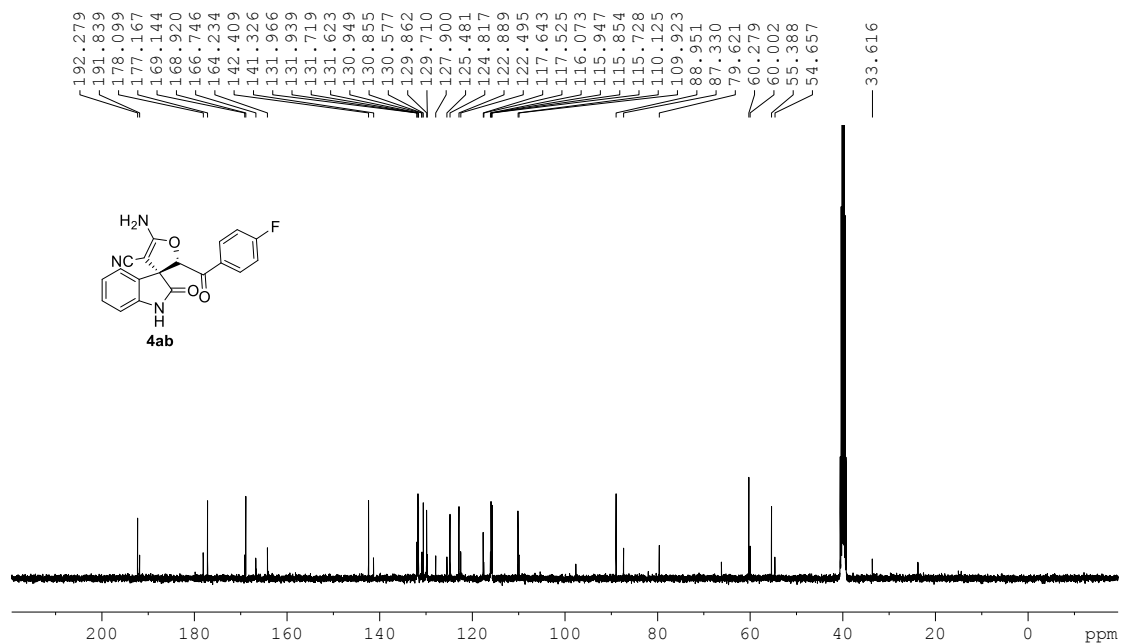

$^{19}\text{F}$  NMR spectrum of compound **4ab** ( $(\text{CD}_3)_2\text{SO}$ , 376 MHz)

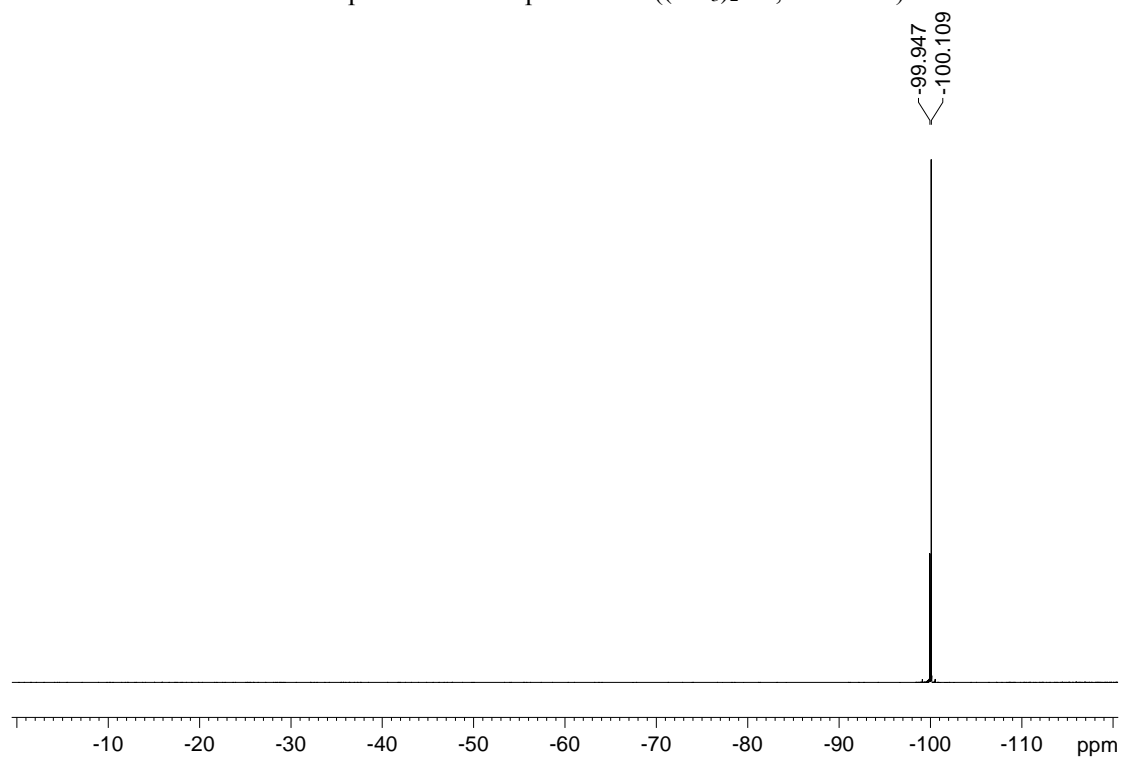

<sup>1</sup>H NMR spectrum of compound **4ac** ((CD<sub>3</sub>)<sub>2</sub>SO, 400 MHz)

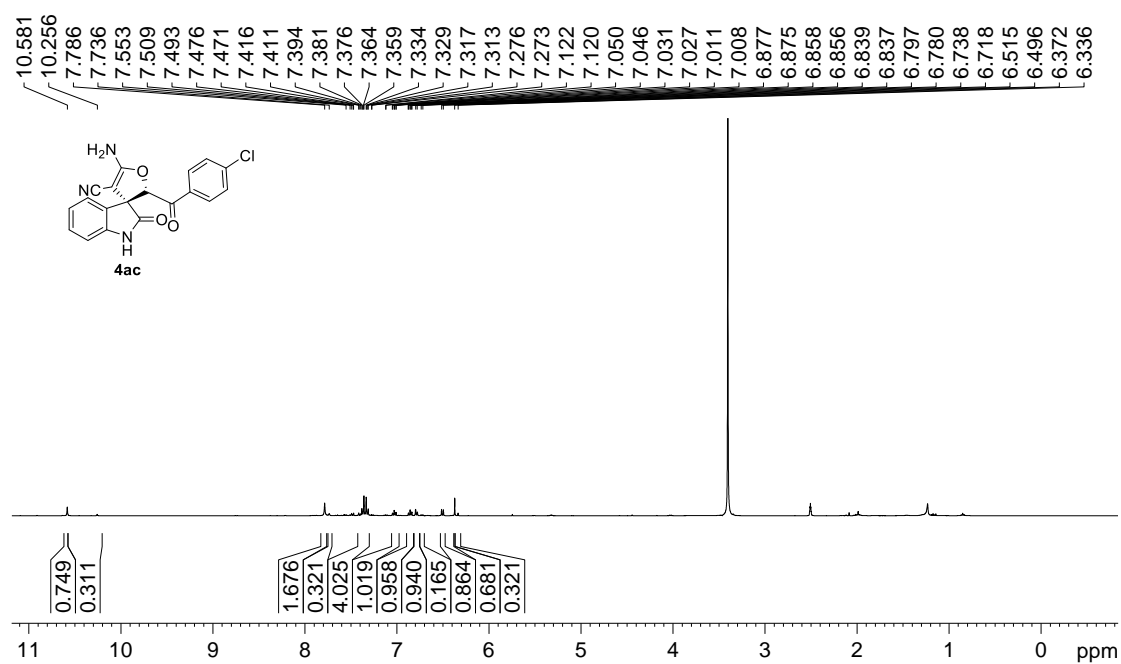

<sup>13</sup>C NMR spectrum of compound **4ac** ((CD<sub>3</sub>)<sub>2</sub>SO, 100 MHz)

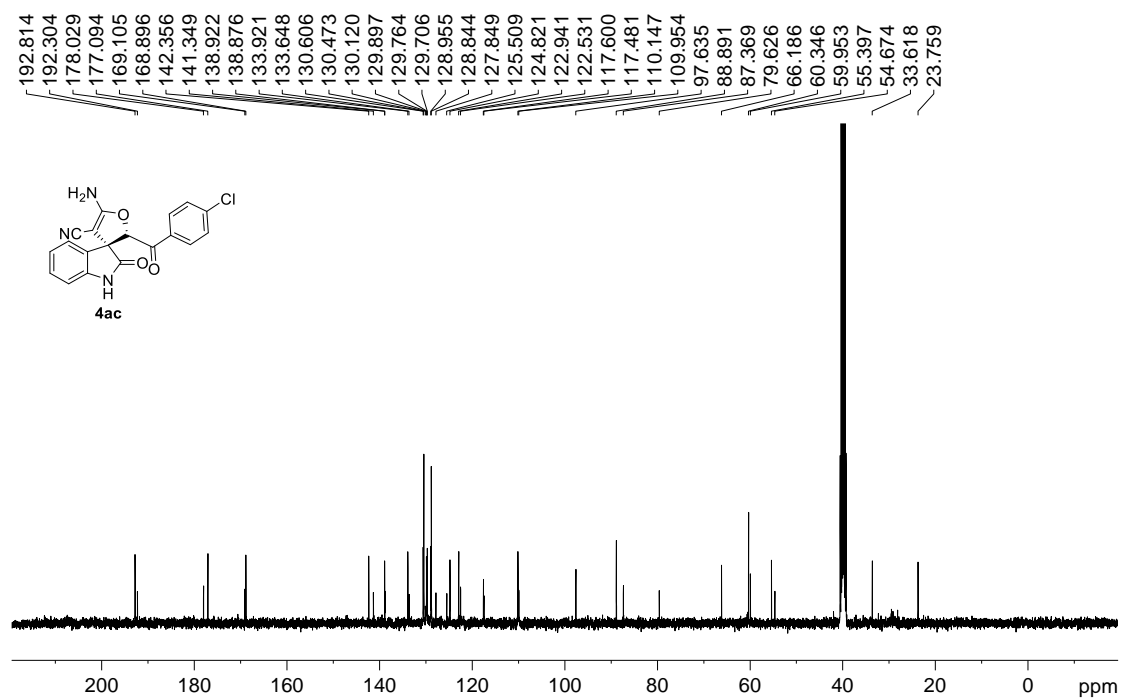

<sup>1</sup>H NMR spectrum of compound **4ad** ((CD<sub>3</sub>)<sub>2</sub>SO, 400 MHz)

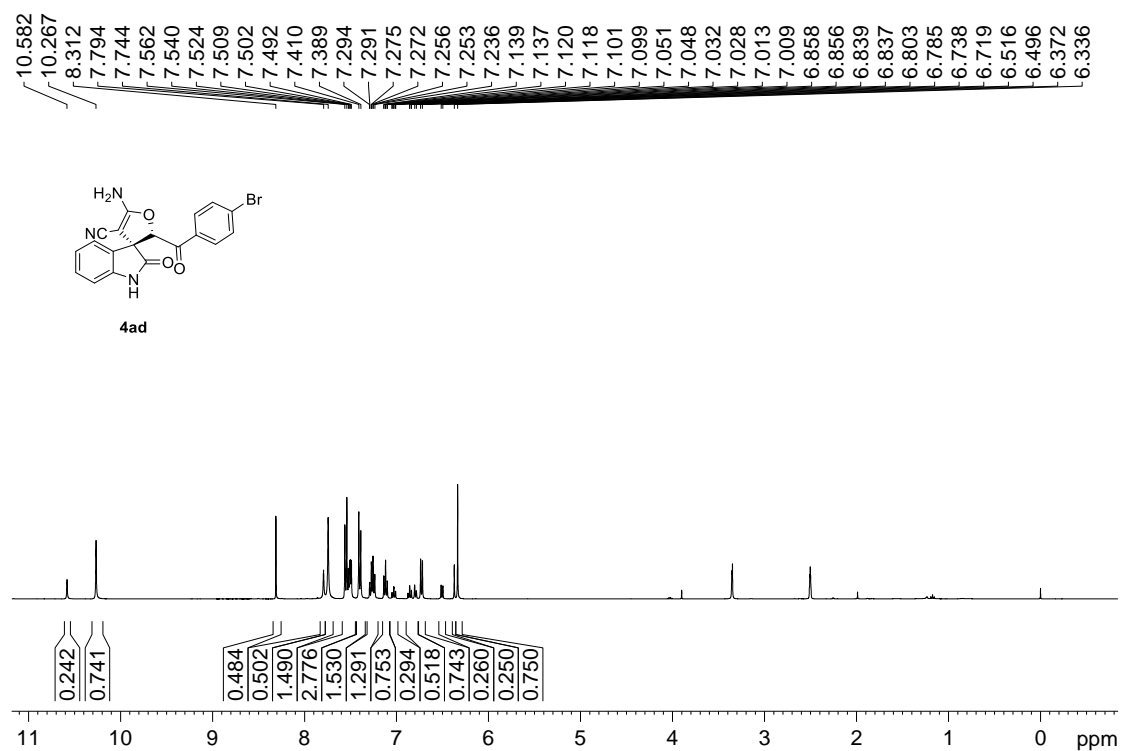

<sup>13</sup>C NMR spectrum of compound **4ad** ((CD<sub>3</sub>)<sub>2</sub>SO, 100 MHz)

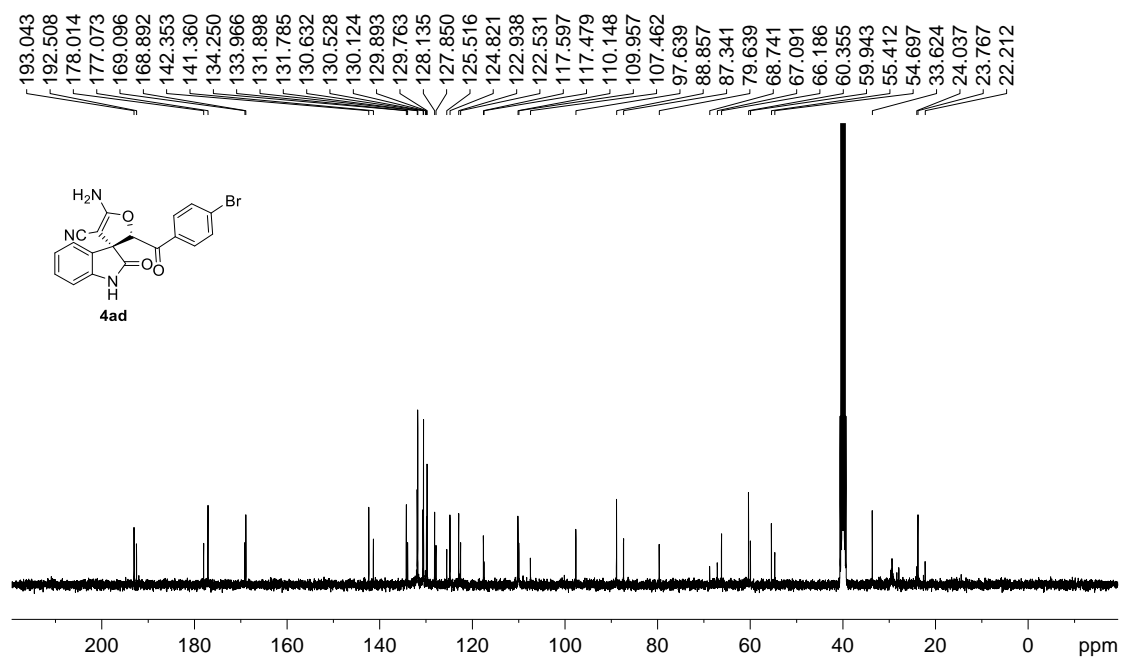

<sup>1</sup>H NMR spectrum of compound **4ae** ((CD<sub>3</sub>)<sub>2</sub>SO, 400 MHz)

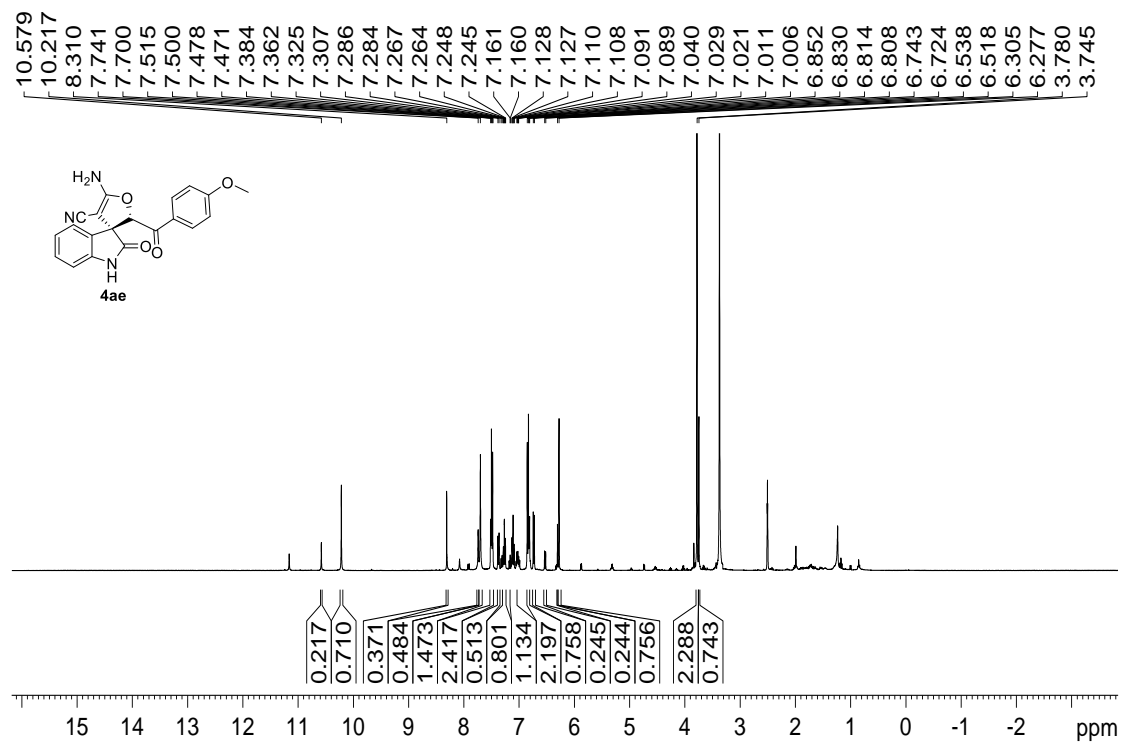

<sup>13</sup>C NMR spectrum of compound **4ae** ((CD<sub>3</sub>)<sub>2</sub>SO, 100 MHz)

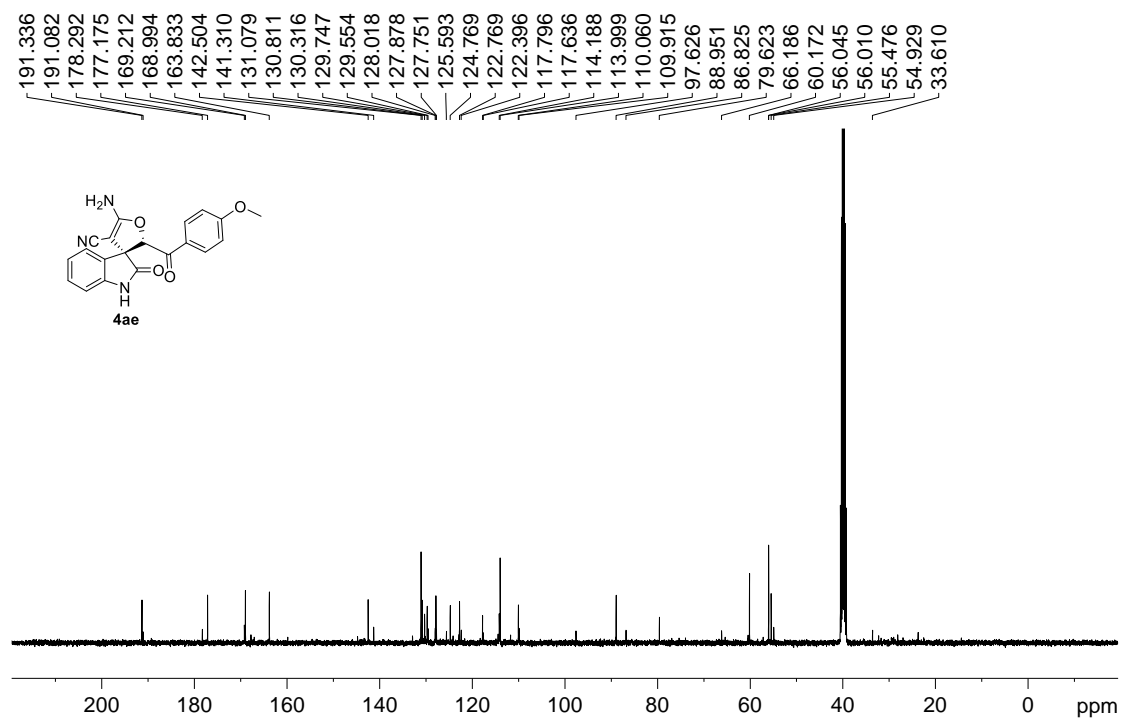

<sup>1</sup>H NMR spectrum of compound **4af** ((CD<sub>3</sub>)<sub>2</sub>SO, 400 MHz)

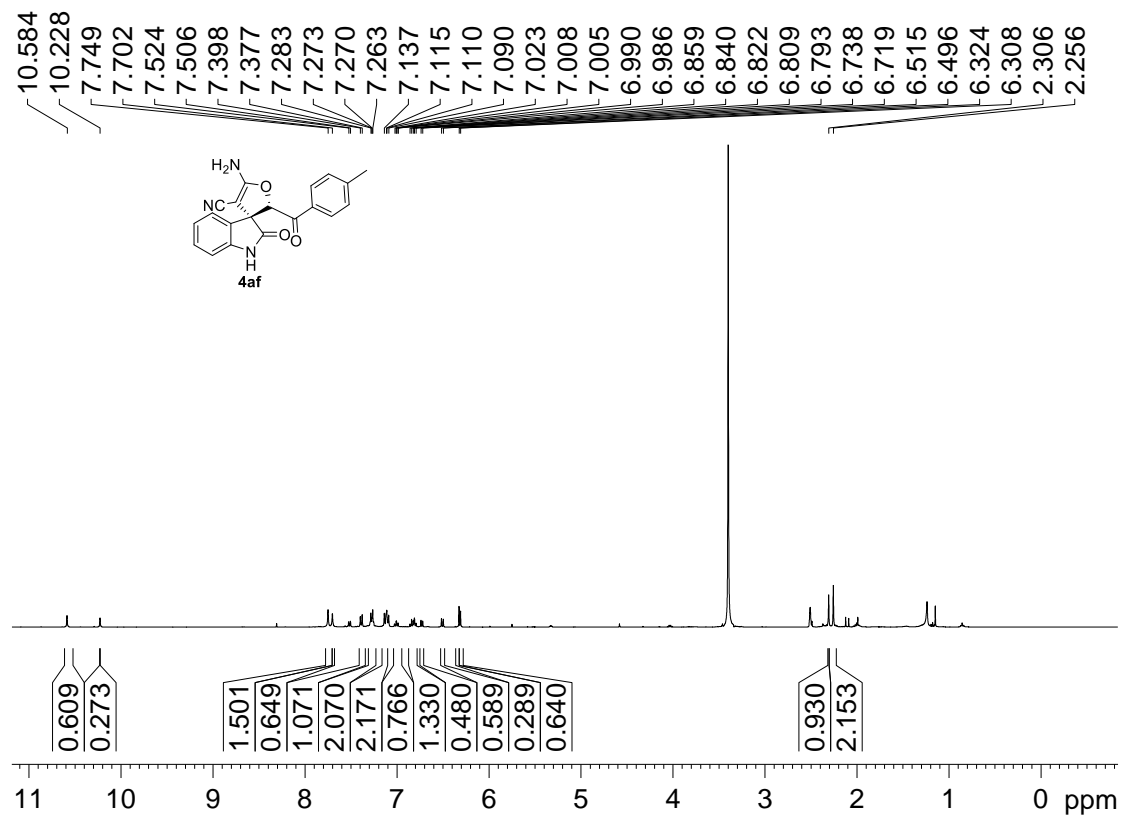

<sup>13</sup>C NMR spectrum of compound **4af** ((CD<sub>3</sub>)<sub>2</sub>SO, 100 MHz)

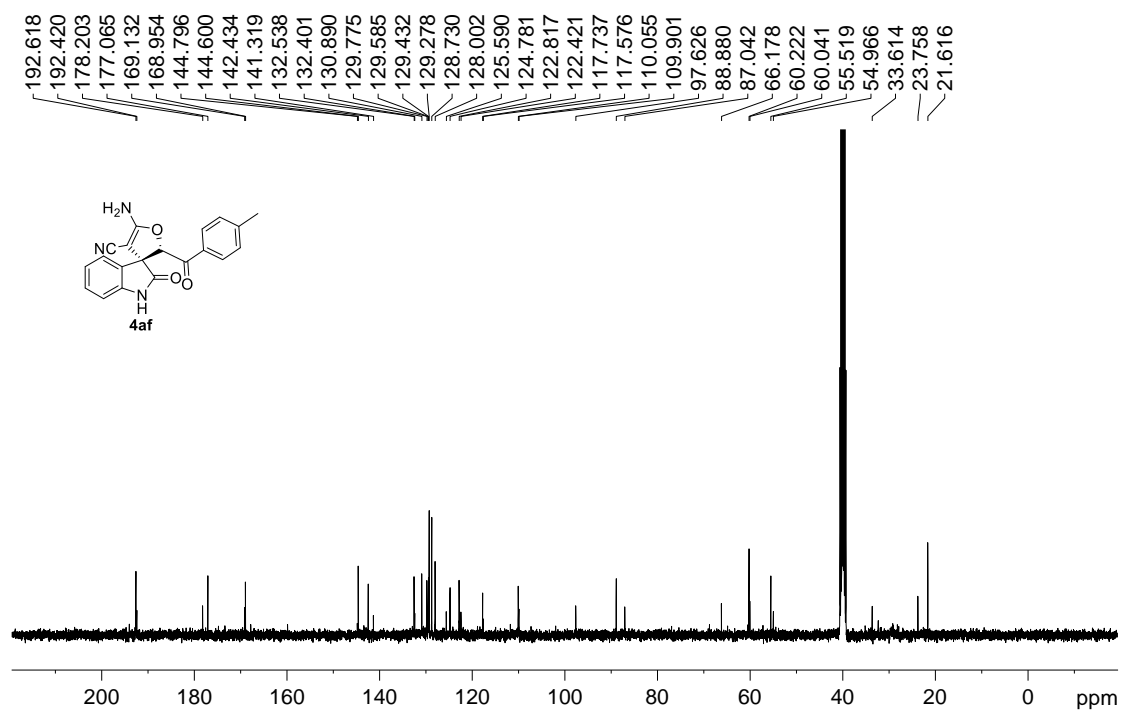

<sup>1</sup>H NMR spectrum of compound **4ag** ((CD<sub>3</sub>)<sub>2</sub>SO, 400 MHz)

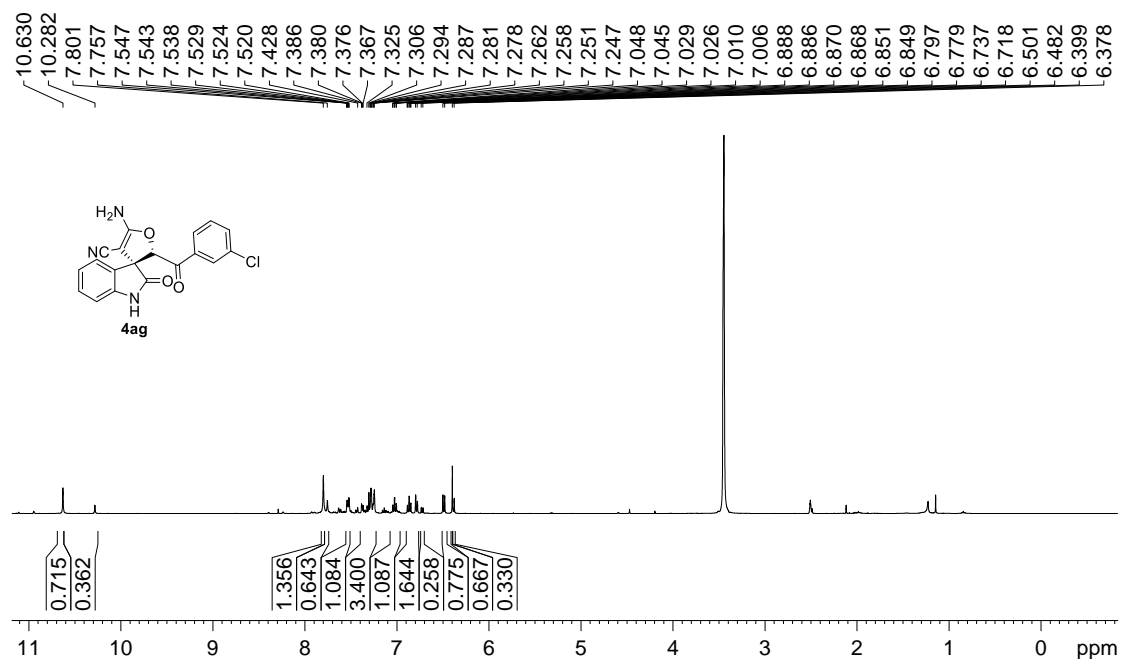

<sup>13</sup>C NMR spectrum of compound **4ag** ((CD<sub>3</sub>)<sub>2</sub>SO, 100 MHz)

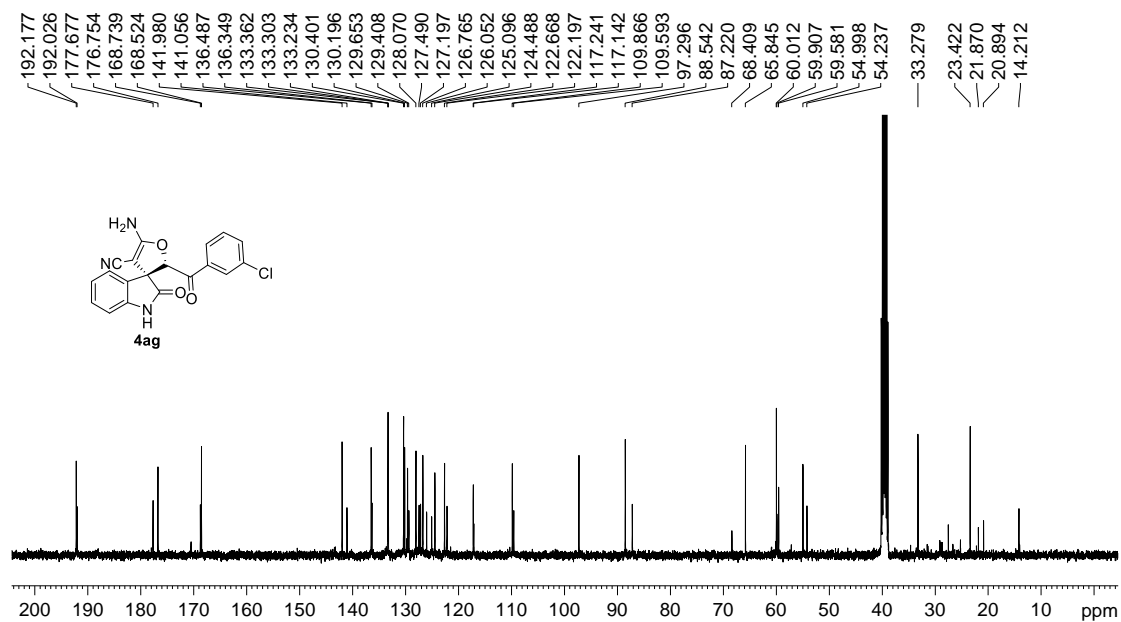



<sup>1</sup>H NMR spectrum of compound **4ah** ((CD<sub>3</sub>)<sub>2</sub>SO, 400 MHz)

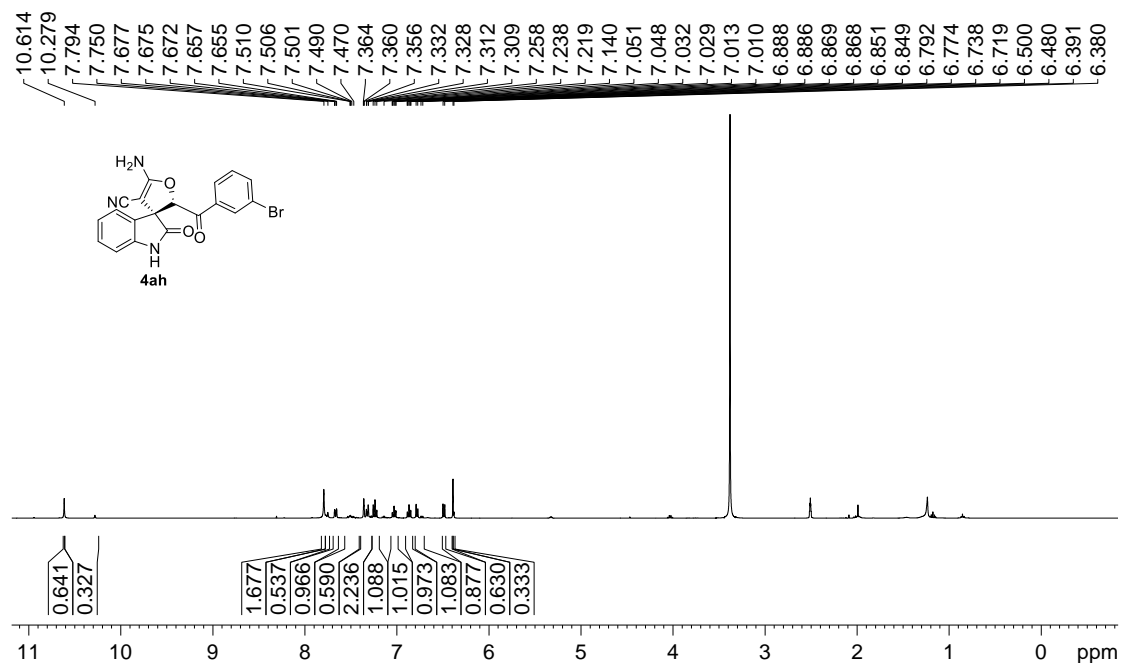

<sup>13</sup>C NMR spectrum of compound **4ah** ((CD<sub>3</sub>)<sub>2</sub>SO, 100 MHz)

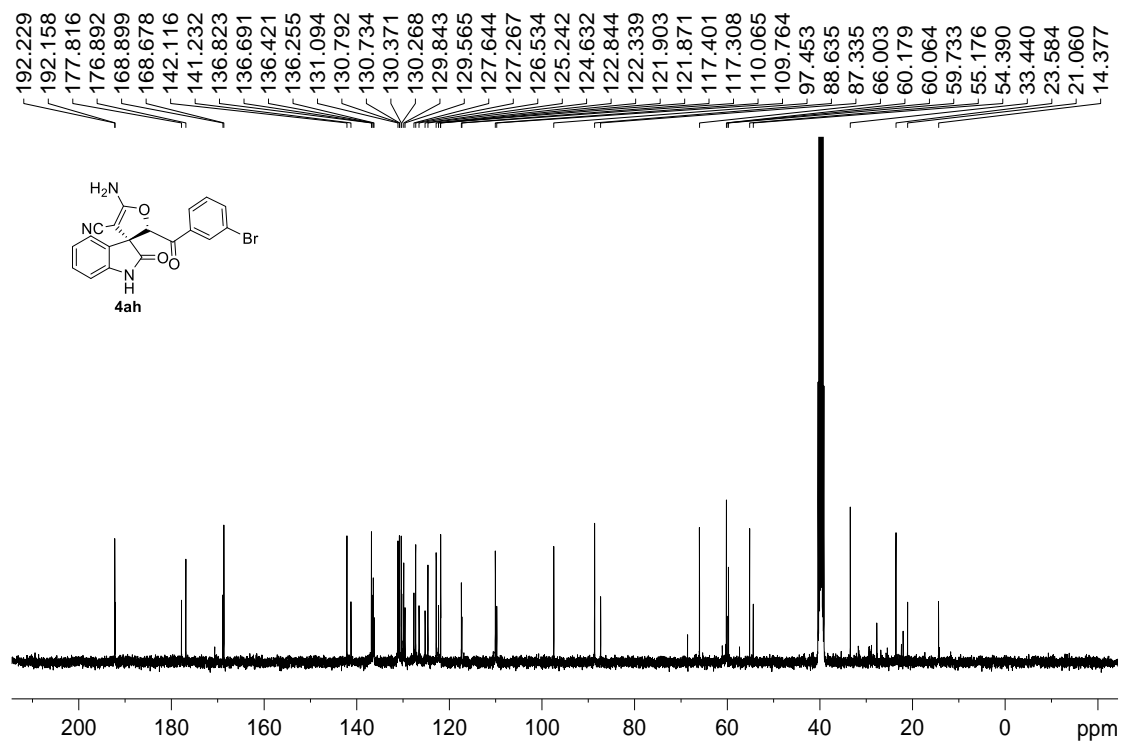

<sup>1</sup>H NMR spectrum of compound **4ai** ((CD<sub>3</sub>)<sub>2</sub>SO, 400 MHz)

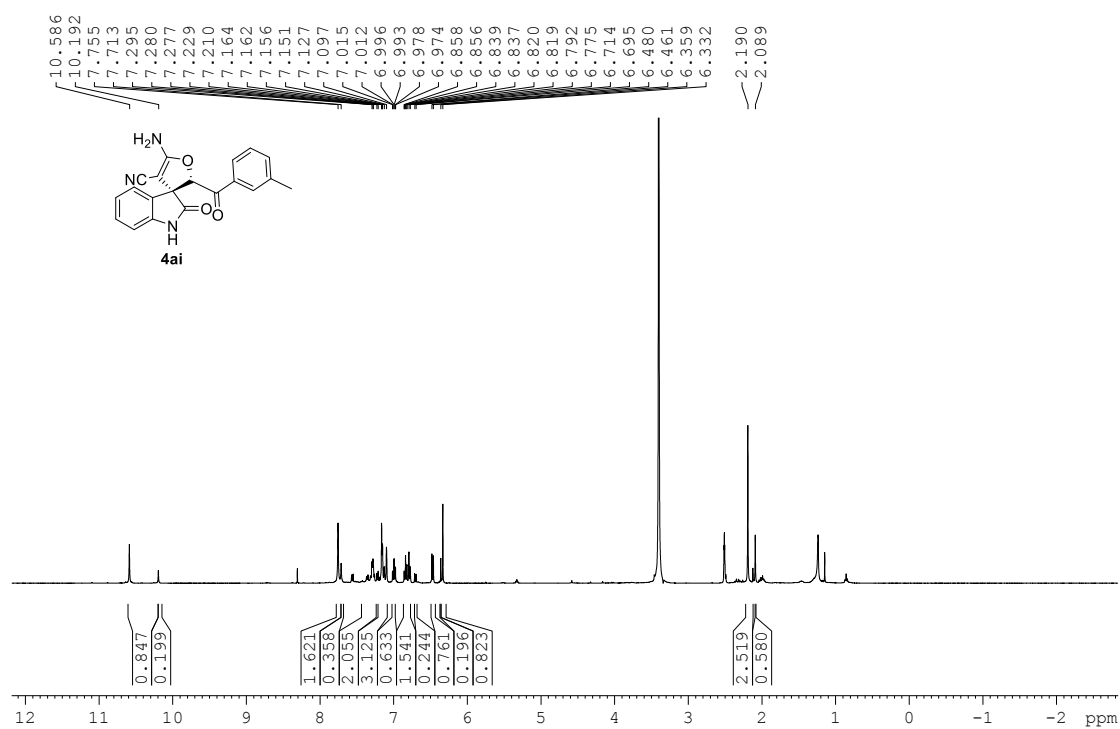

<sup>13</sup>C NMR spectrum of compound **4ai** ((CD<sub>3</sub>)<sub>2</sub>SO, 100 MHz)

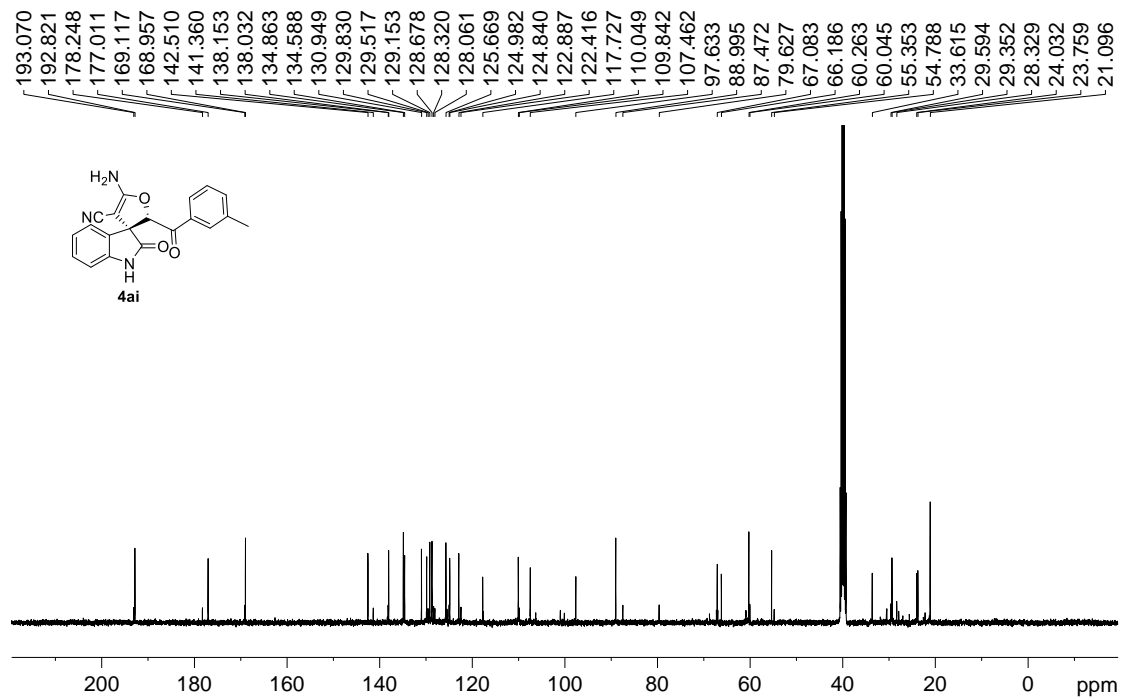

<sup>1</sup>H NMR spectrum of compound **4aj** ((CD<sub>3</sub>)<sub>2</sub>SO, 400 MHz)

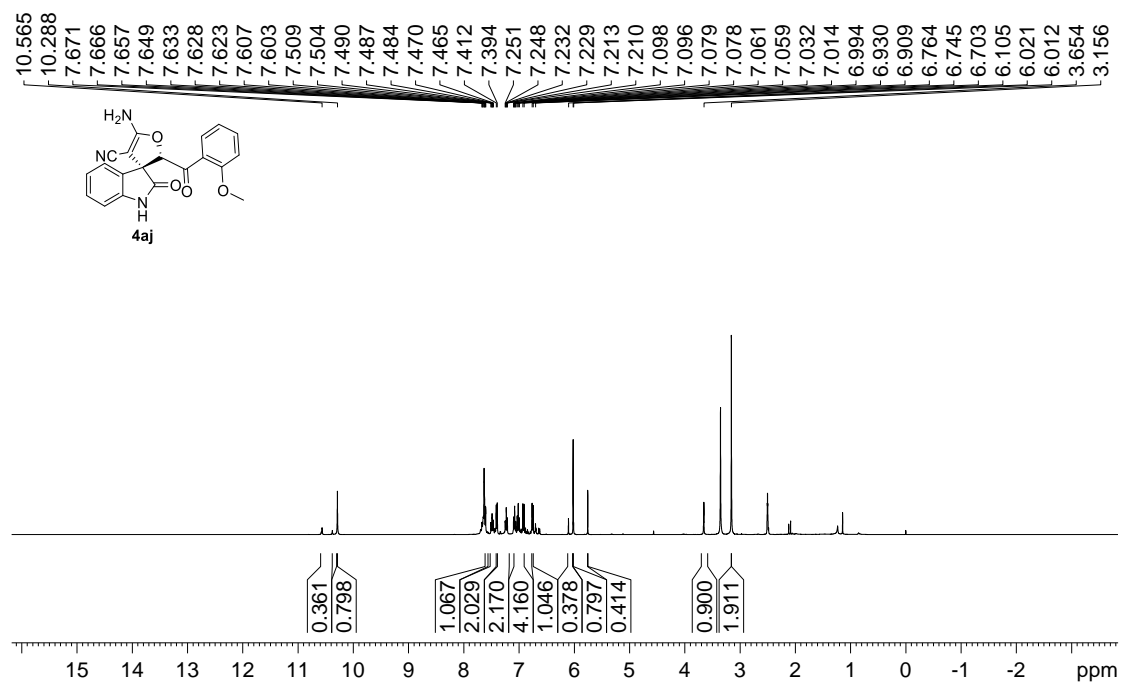

<sup>13</sup>C NMR spectrum of compound **4aj** ((CD<sub>3</sub>)<sub>2</sub>SO, 100 MHz)

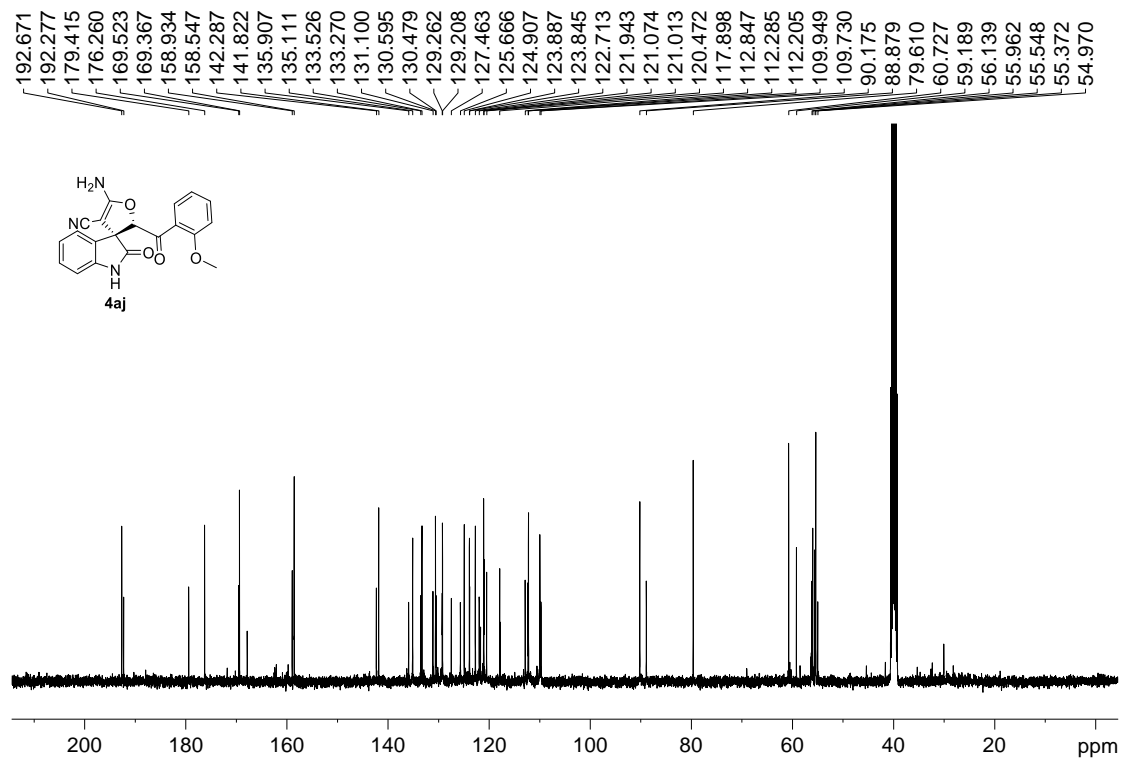

<sup>1</sup>H NMR spectrum of compound **4ak** ((CD<sub>3</sub>)<sub>2</sub>SO, 400 MHz)

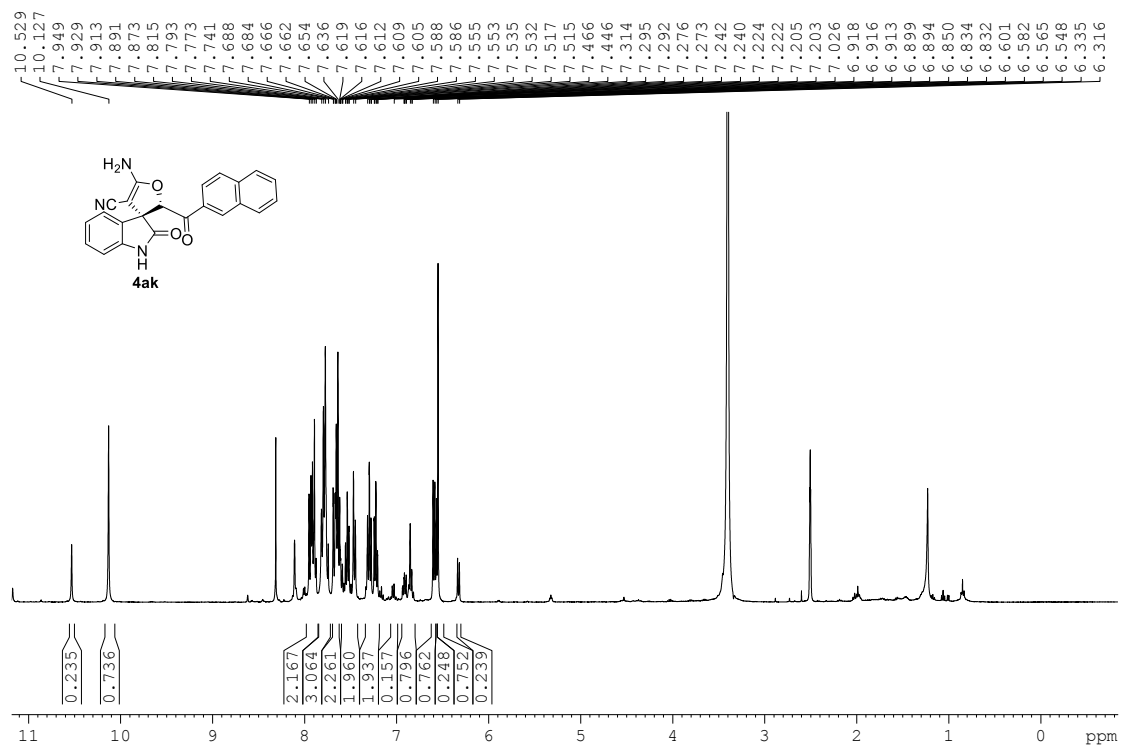

<sup>13</sup>C NMR spectrum of compound **4ak** ((CD<sub>3</sub>)<sub>2</sub>SO, 100 MHz)

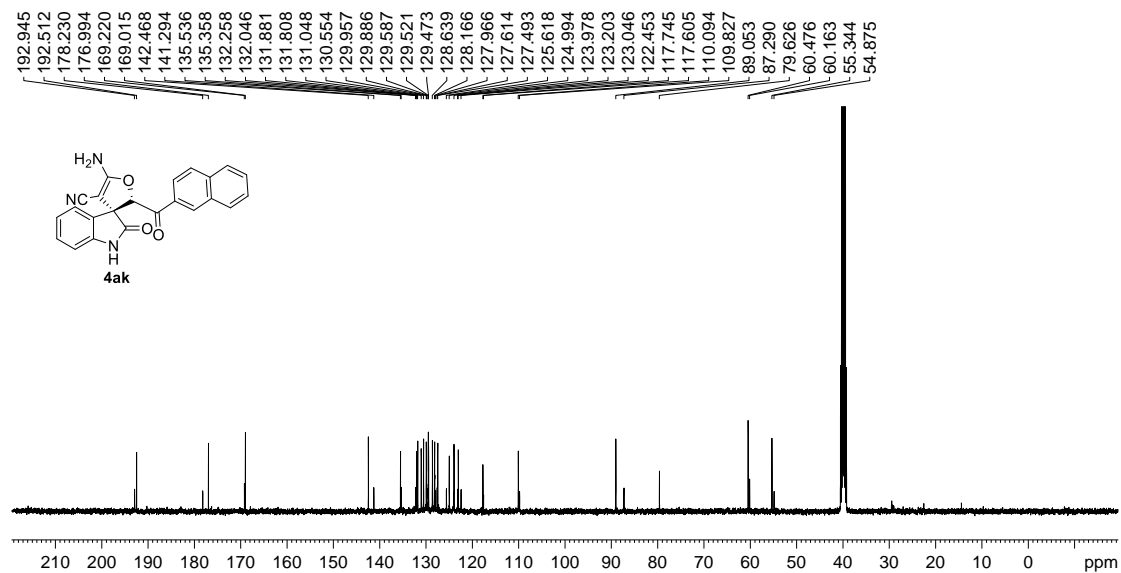

<sup>1</sup>H NMR spectrum of compound **4al** ((CD<sub>3</sub>)<sub>2</sub>SO, 400 MHz)

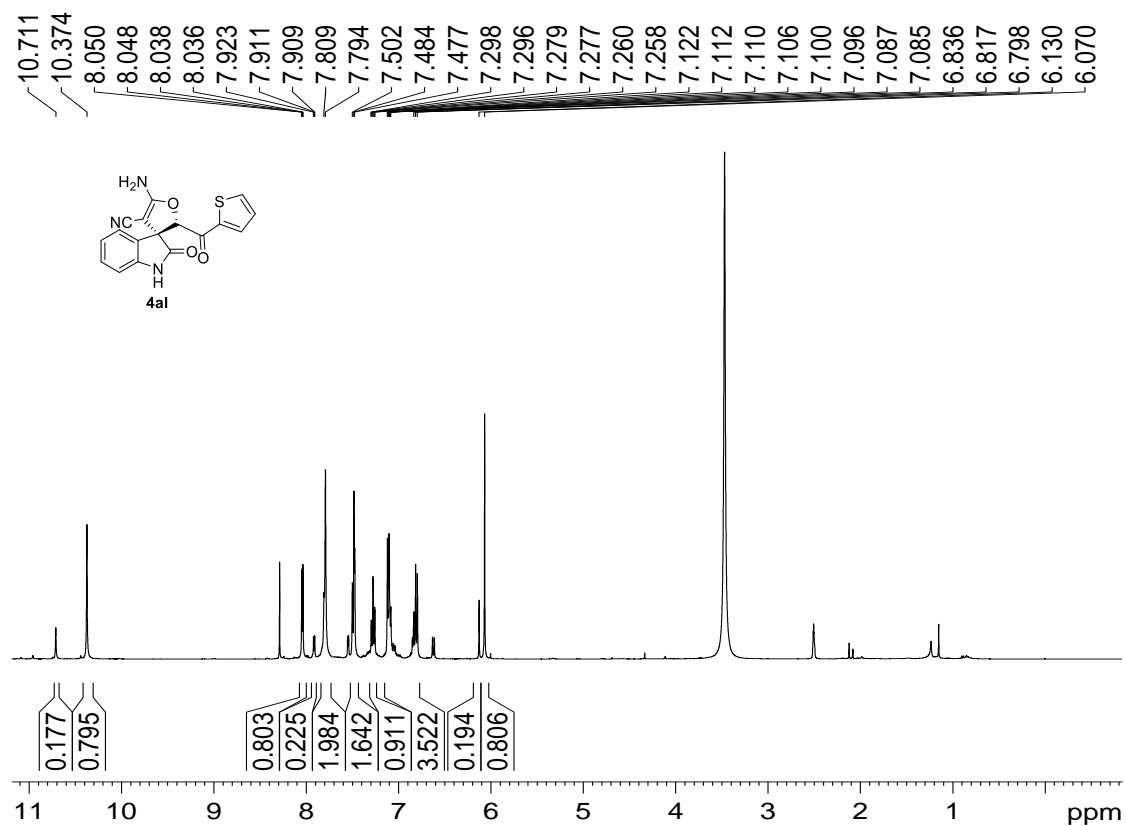

<sup>13</sup>C NMR spectrum of compound **4al** ((CD<sub>3</sub>)<sub>2</sub>SO, 100 MHz)

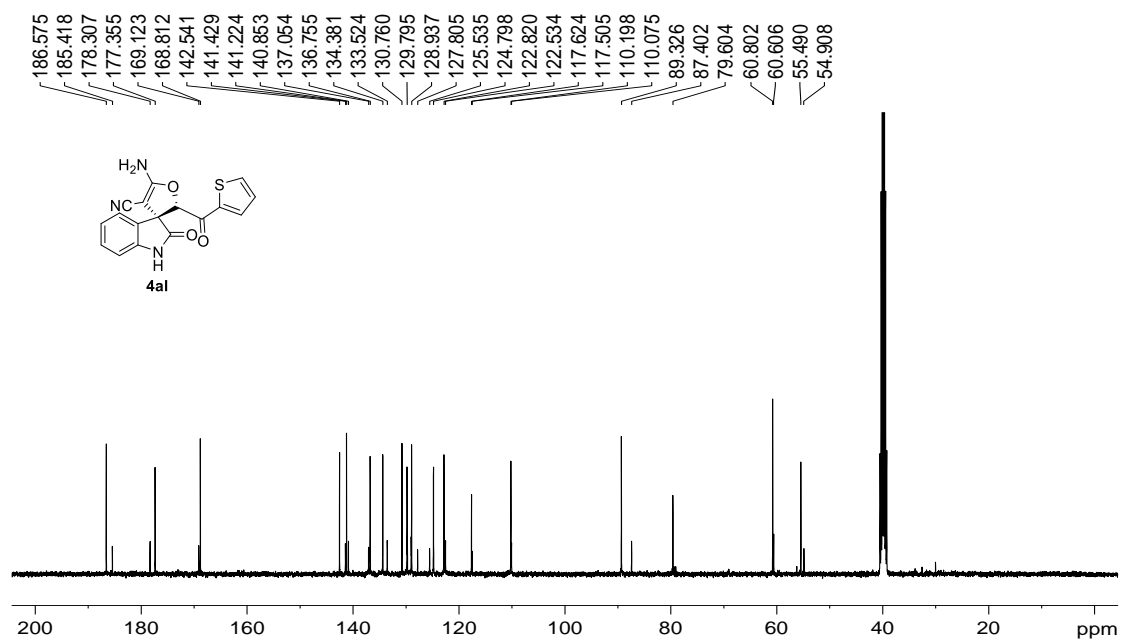

$^1\text{H}$  NMR spectrum of compound **4am** ( $(\text{CD}_3)_2\text{SO}$ , 400 MHz)

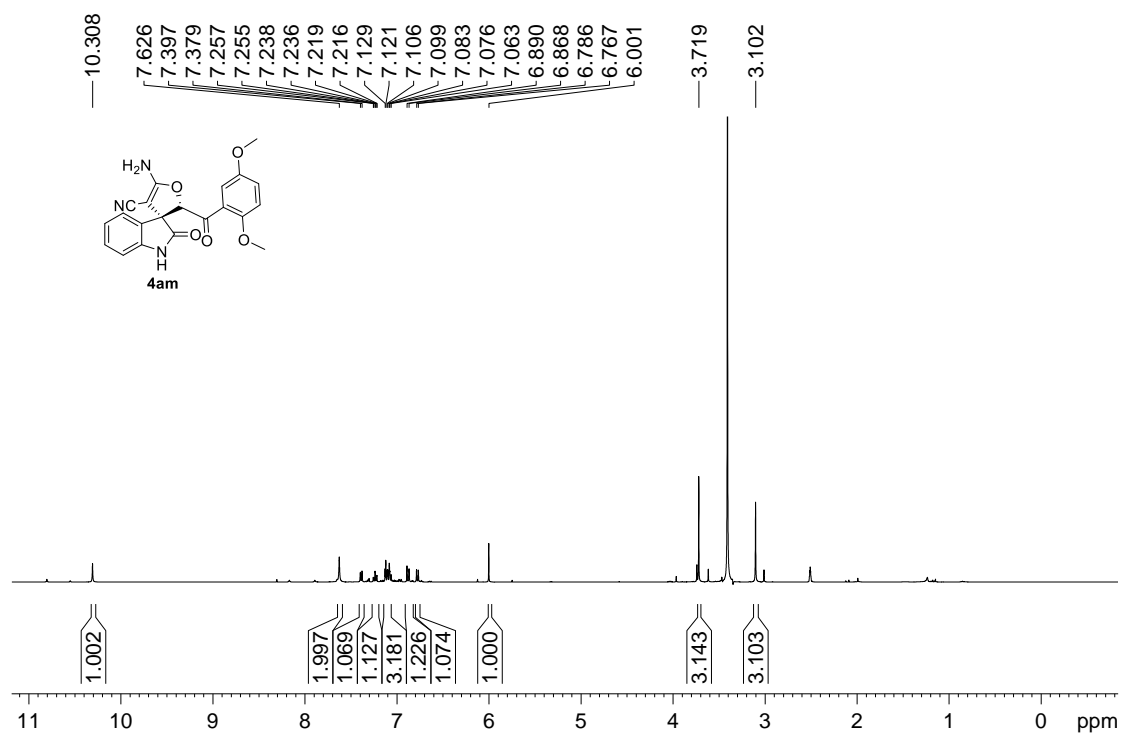

$^{13}\text{C}$  NMR spectrum of compound **4am** ( $(\text{CD}_3)_2\text{SO}$ , 100 MHz)

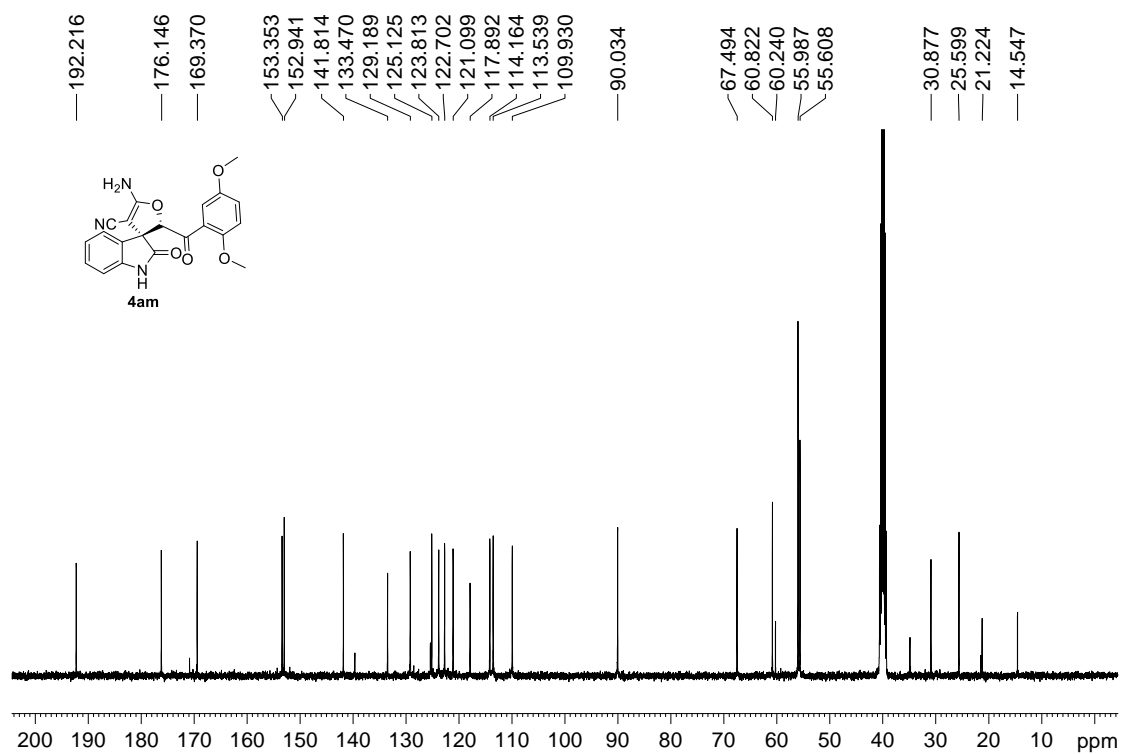

<sup>1</sup>H NMR spectrum of compound **4an** ((CD<sub>3</sub>)<sub>2</sub>SO, 400 MHz)

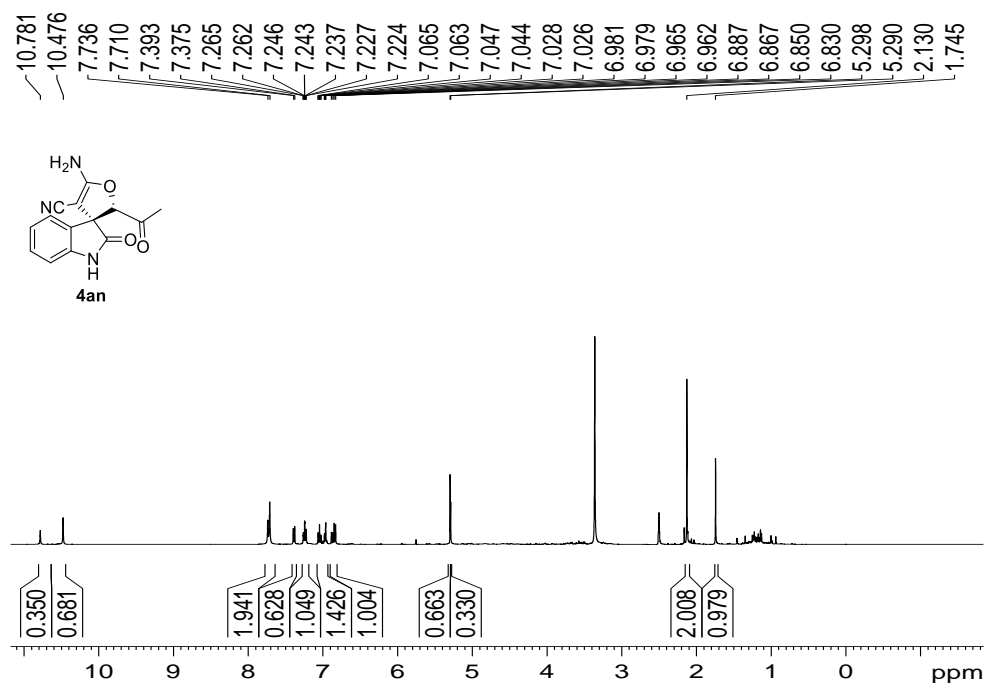

<sup>13</sup>C NMR spectrum of compound **4an** ((CD<sub>3</sub>)<sub>2</sub>SO, 100 MHz)

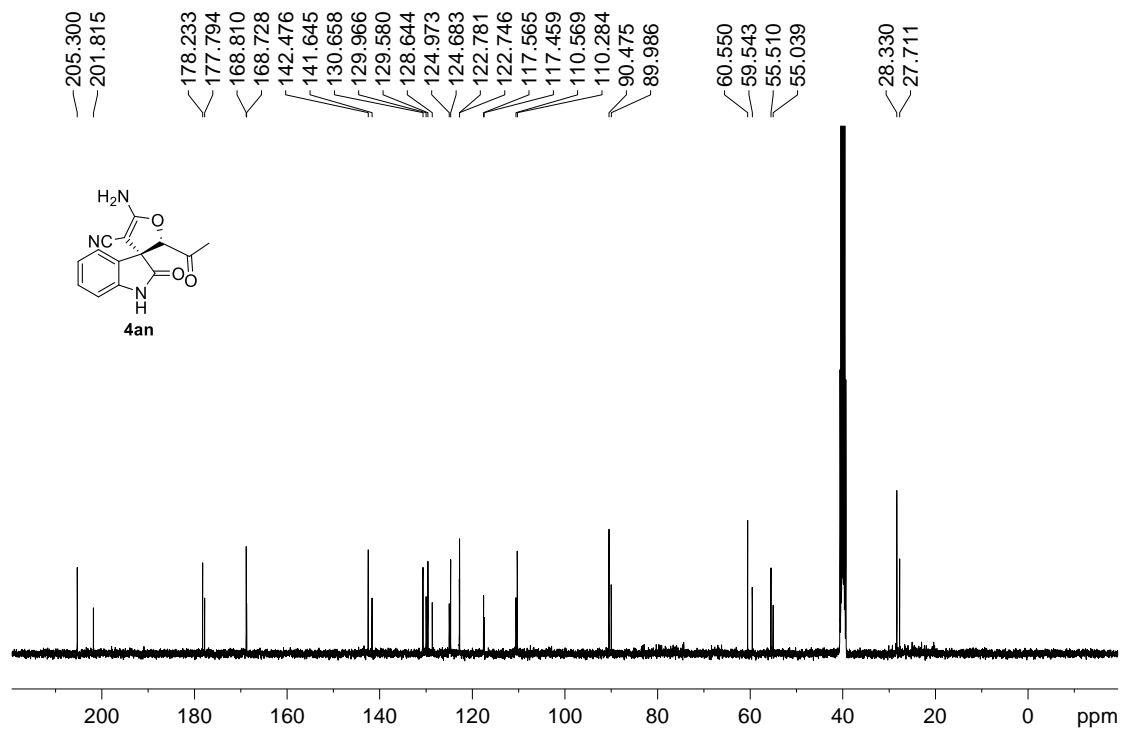

<sup>1</sup>H NMR spectrum of compound **4da** ((CD<sub>3</sub>)<sub>2</sub>SO, 400 MHz)

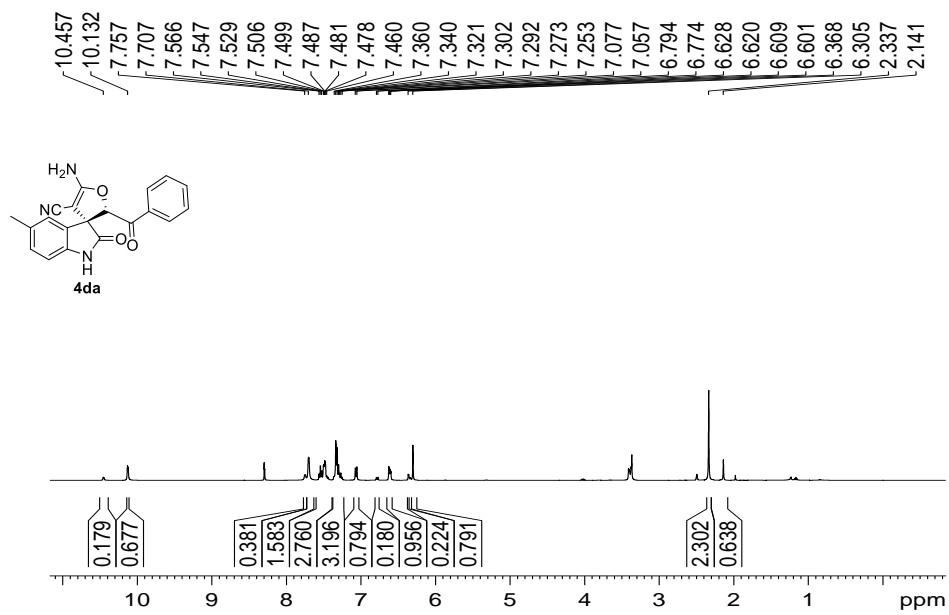

<sup>13</sup>C NMR spectrum of compound **4da** ((CD<sub>3</sub>)<sub>2</sub>SO, 100 MHz)



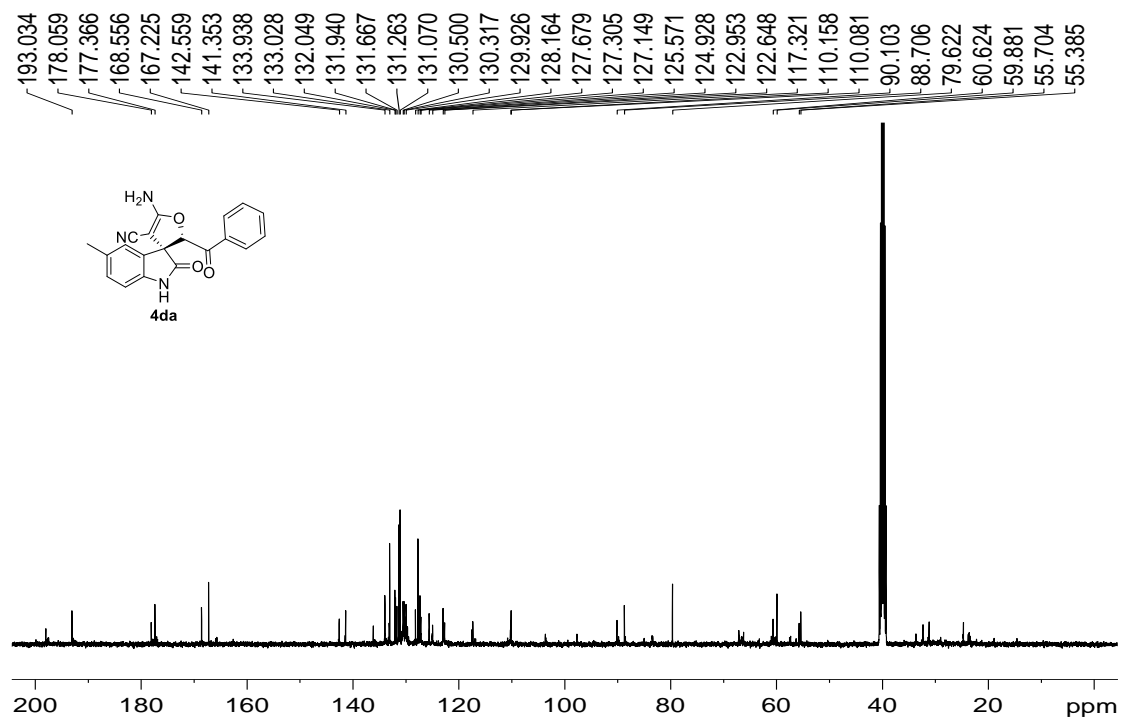

$^{13}\text{C}$  NMR spectrum of compound **4da** ( $(\text{CD}_3)_2\text{SO}$ , 400 MHz)

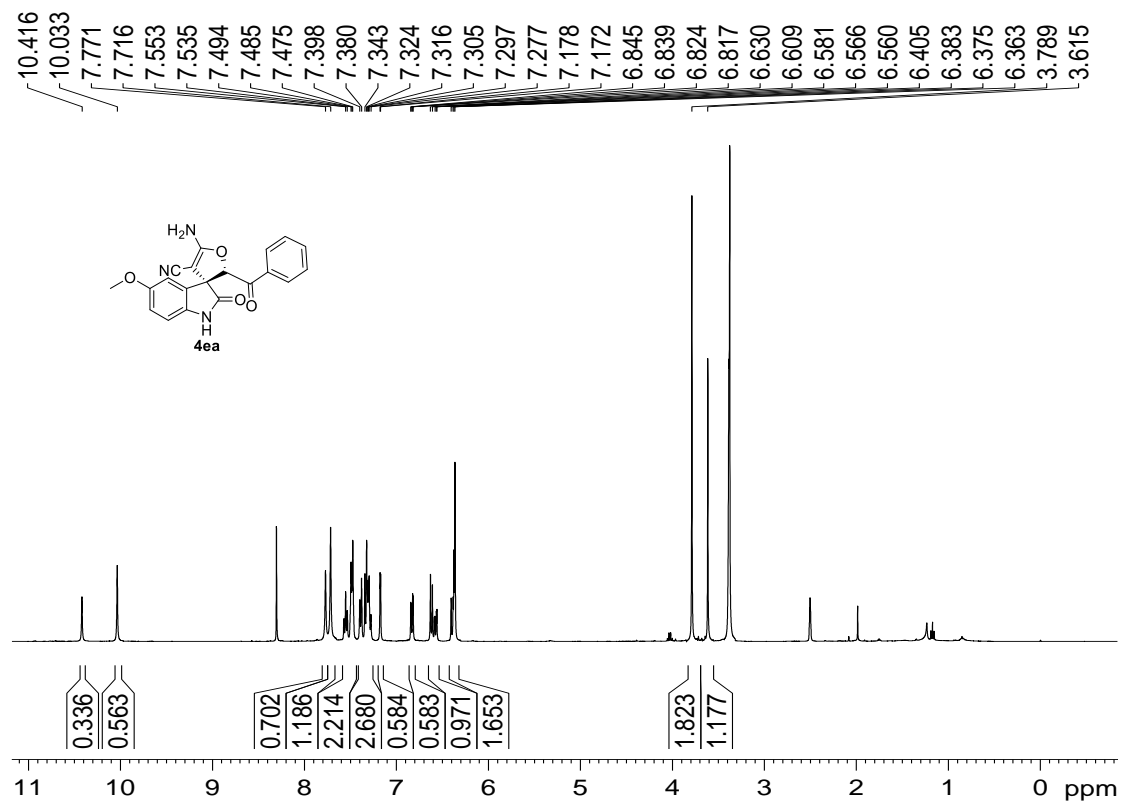

<sup>13</sup>C NMR spectrum of compound 4ea ((CD<sub>3</sub>)<sub>2</sub>SO, 100 MHz)

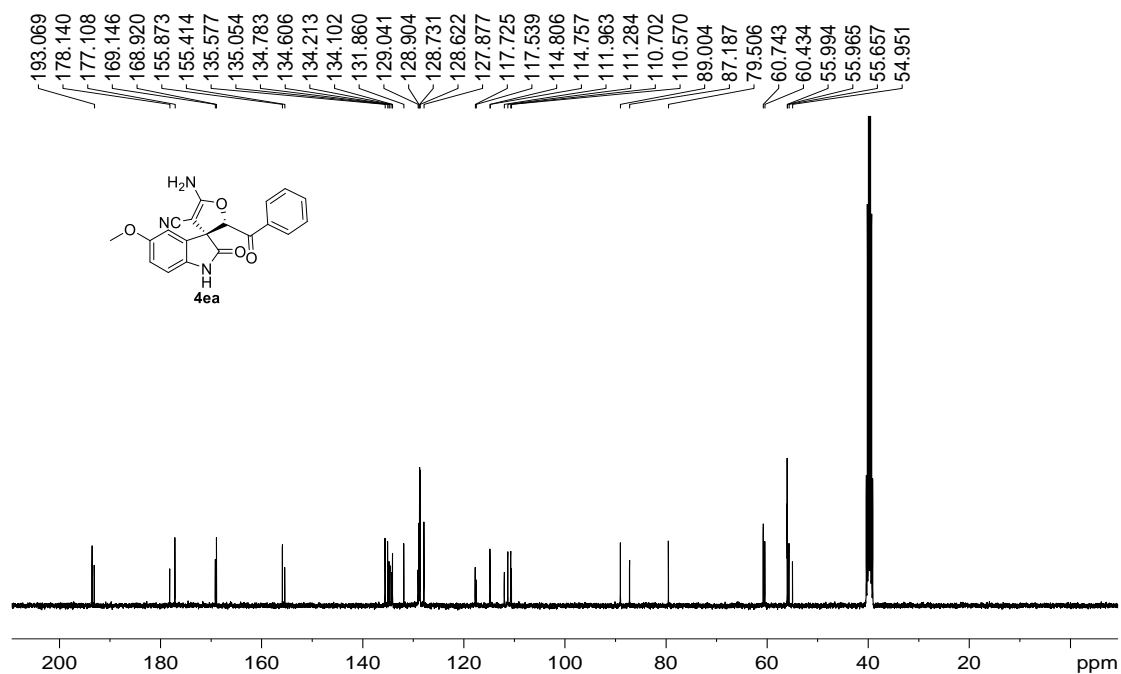

<sup>1</sup>H NMR spectrum of compound 4fa ((CD<sub>3</sub>)<sub>2</sub>SO, 400 MHz)

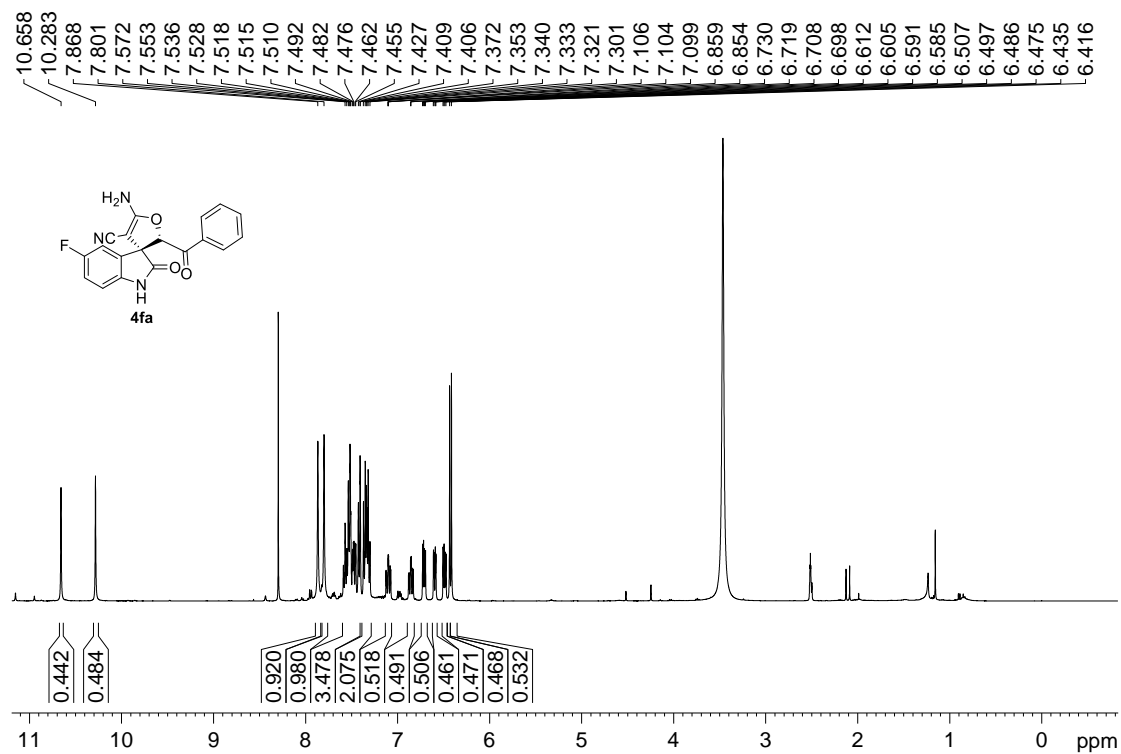

<sup>13</sup>C NMR spectrum of compound 4fa ((CD<sub>3</sub>)<sub>2</sub>SO, 100 MHz)

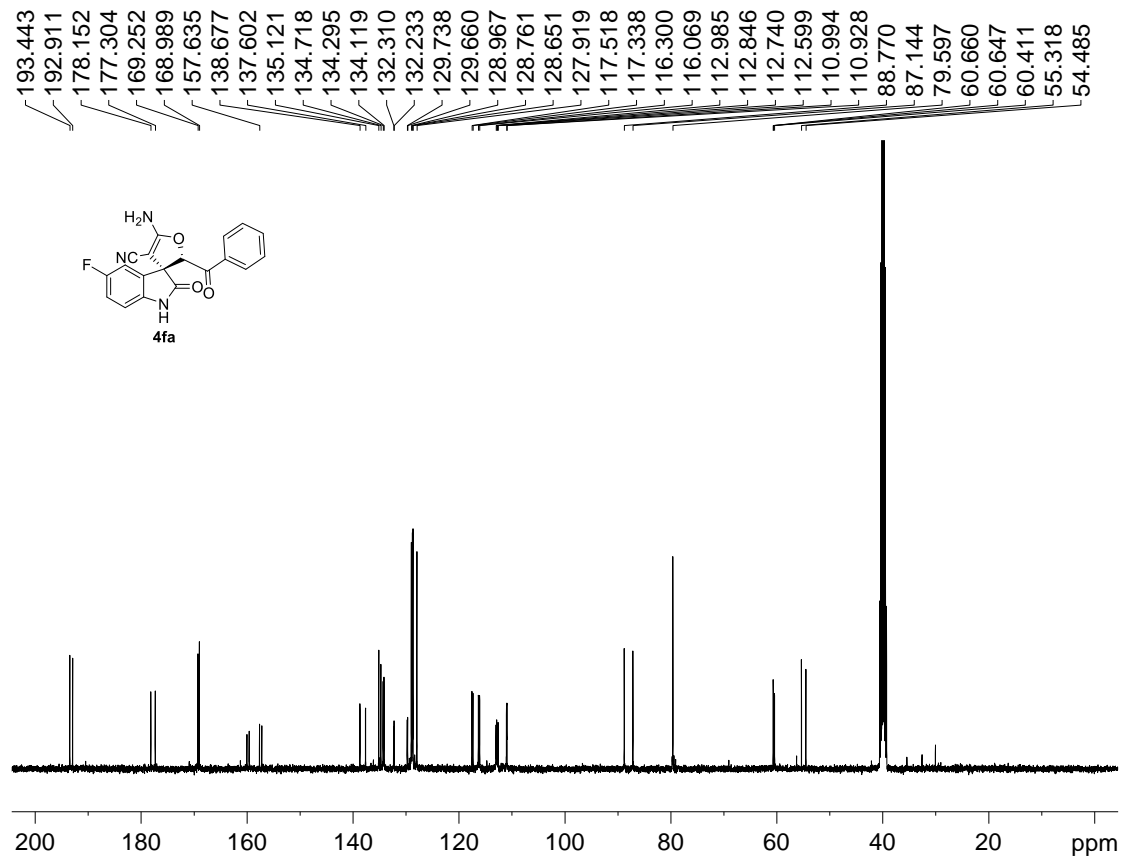

<sup>19</sup>F NMR spectrum of compound 4fa ((CD<sub>3</sub>)<sub>2</sub>SO, 100 MHz)

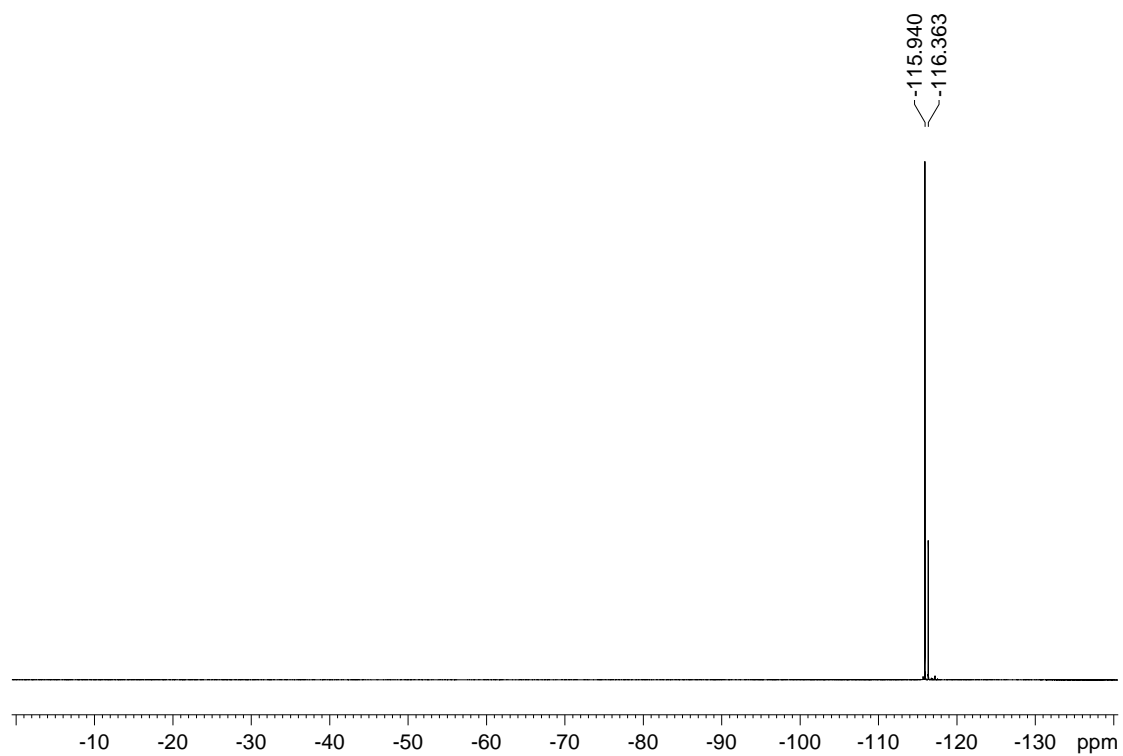

$^1\text{H}$  NMR spectrum of compound **4ga** ( $(\text{CD}_3)_2\text{SO}$ , 400 MHz)

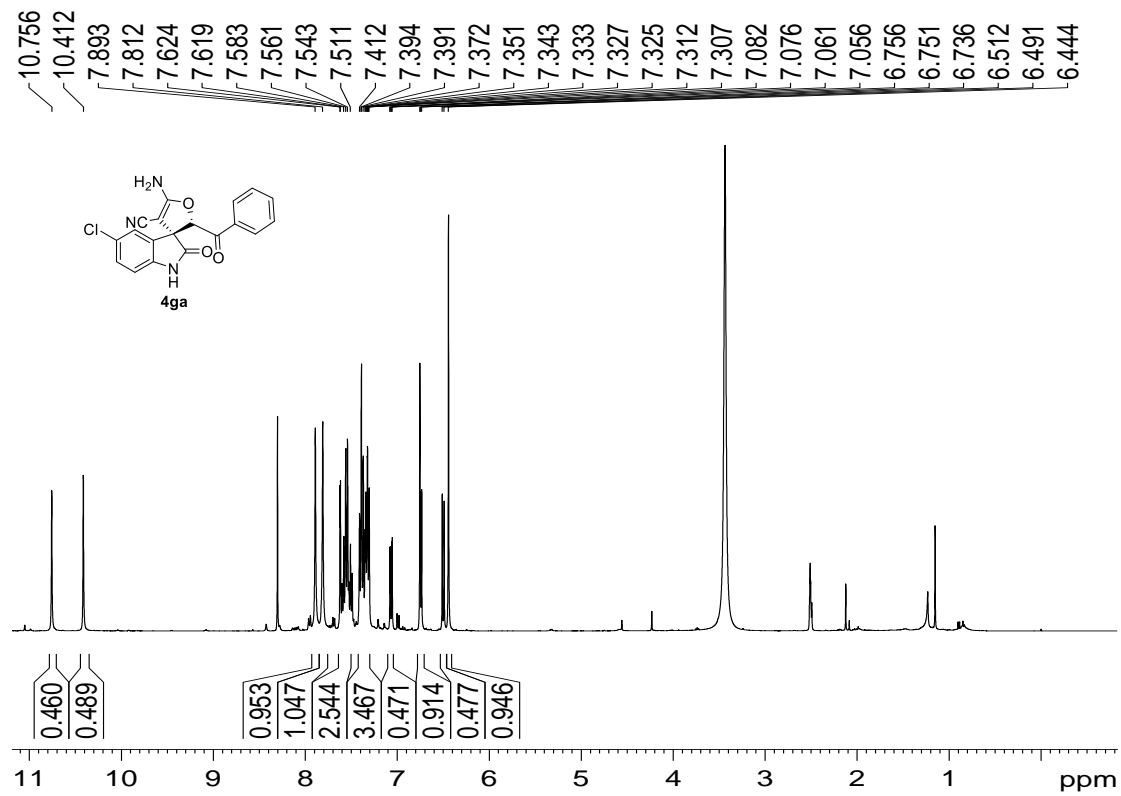

<sup>13</sup>C NMR spectrum of compound 4ga ((CD<sub>3</sub>)<sub>2</sub>SO, 100 MHz)

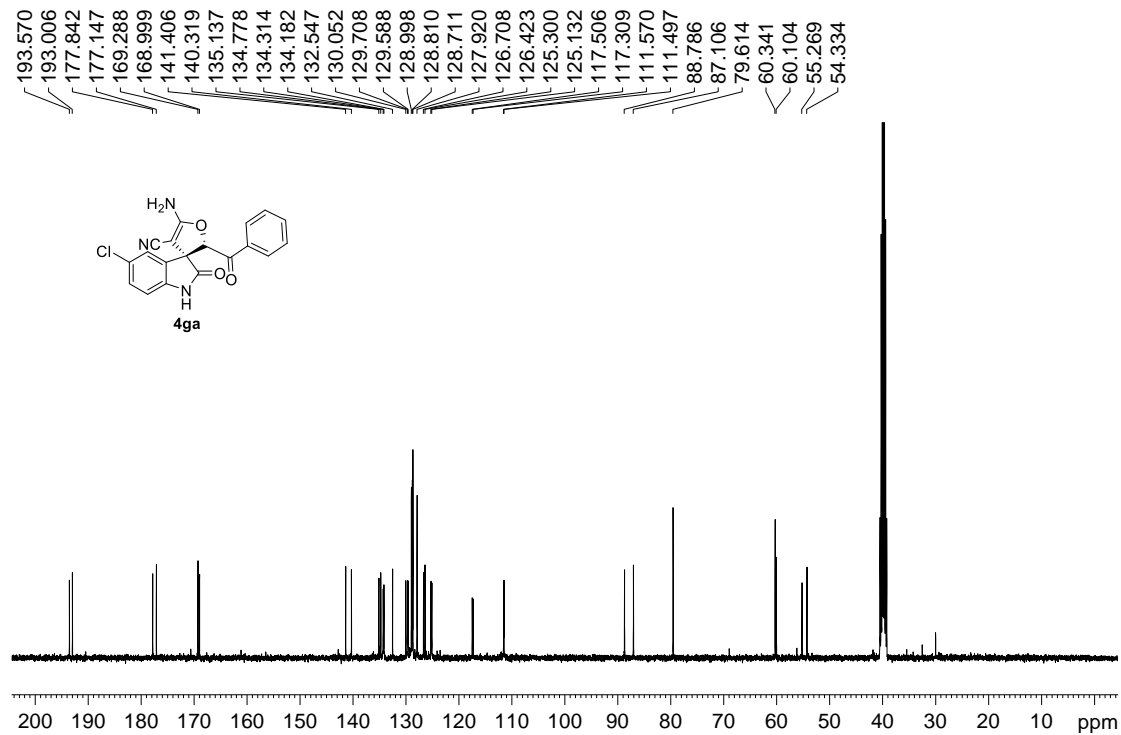

<sup>1</sup>H NMR spectrum of compound 4ha ((CD<sub>3</sub>)<sub>2</sub>SO, 400 MHz)

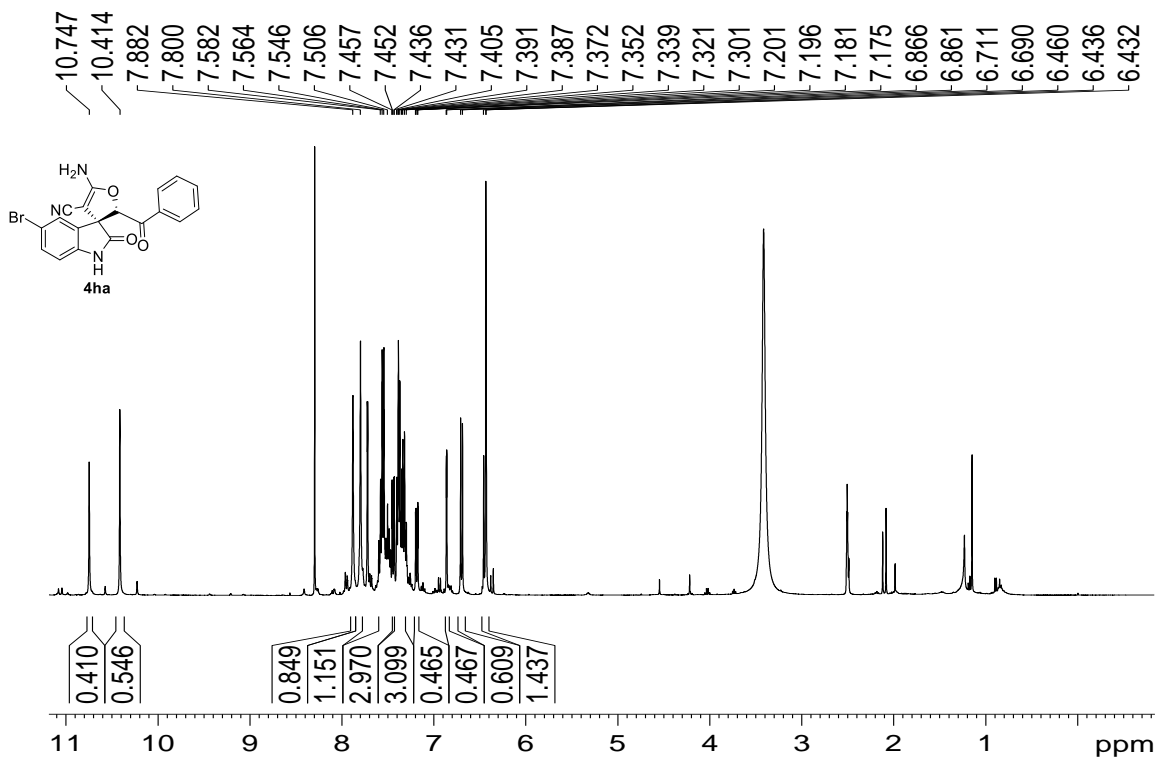

<sup>13</sup>C NMR spectrum of compound **4ha** ((CD<sub>3</sub>)<sub>2</sub>SO, 100 MHz)

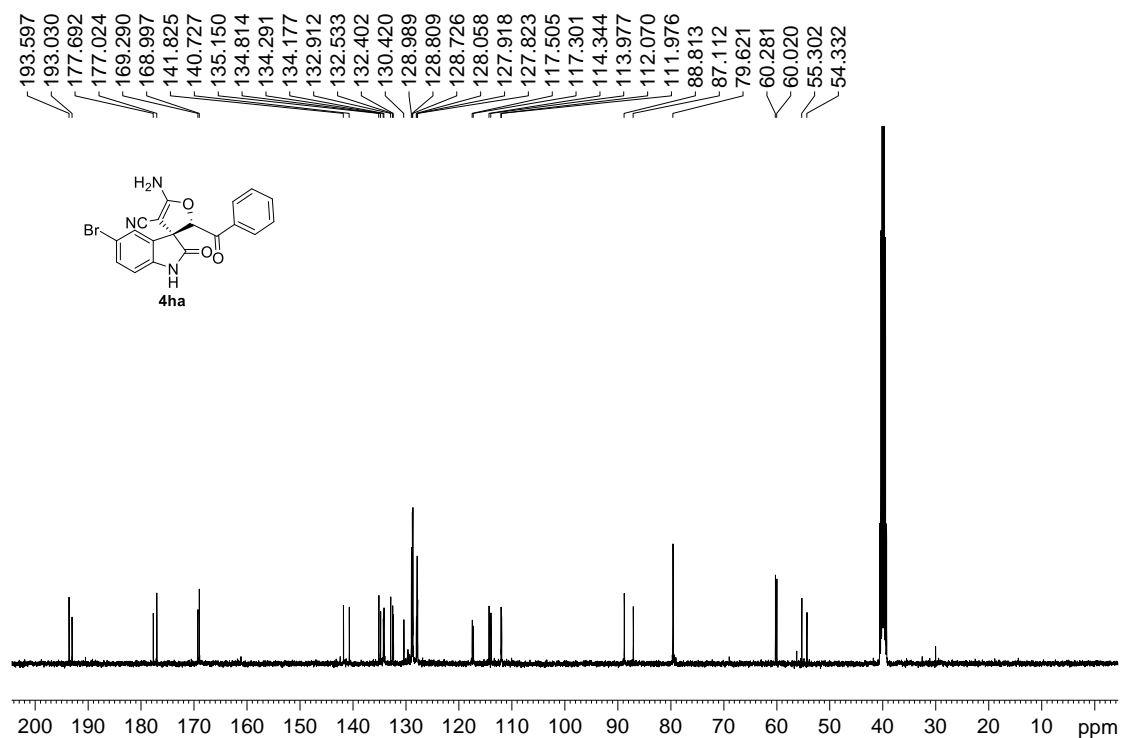

<sup>1</sup>H NMR spectrum of compound **4ia** ((CD<sub>3</sub>)<sub>2</sub>SO, 400 MHz)

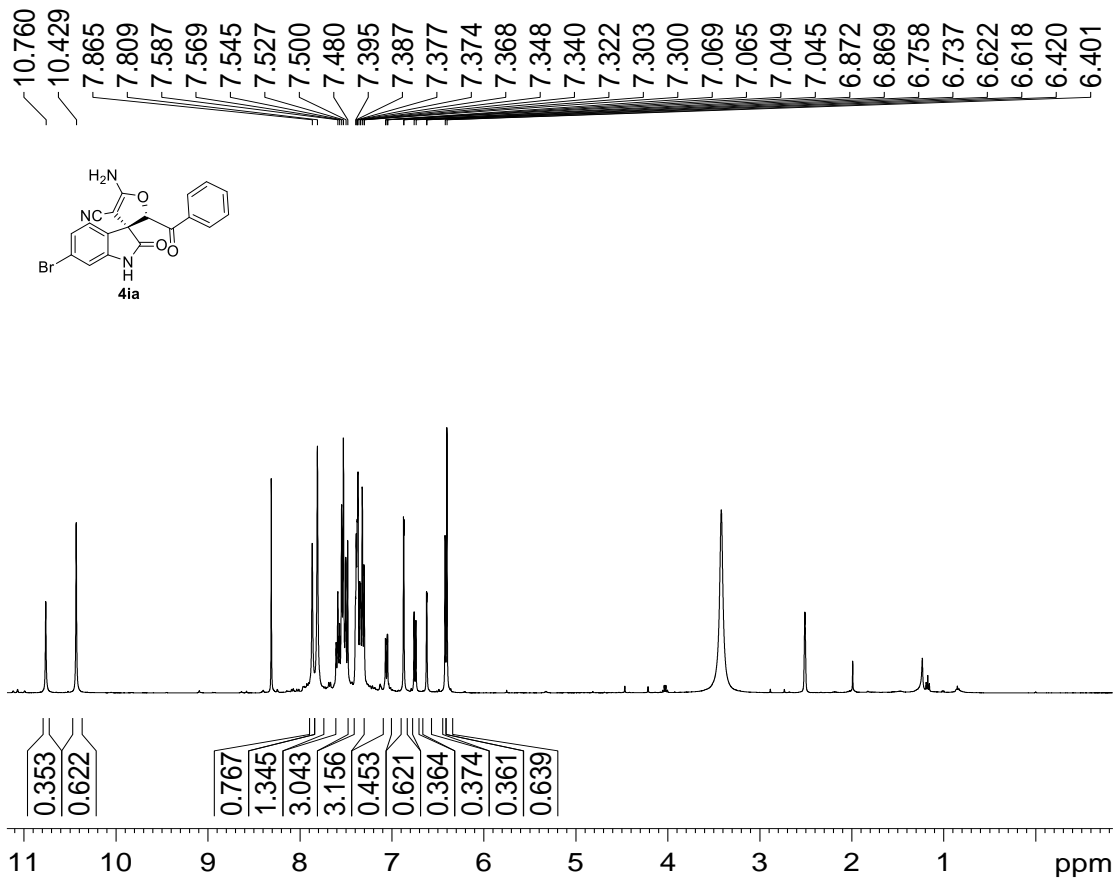

<sup>13</sup>C NMR spectrum of compound 4ia ((CD<sub>3</sub>)<sub>2</sub>SO, 100 MHz)

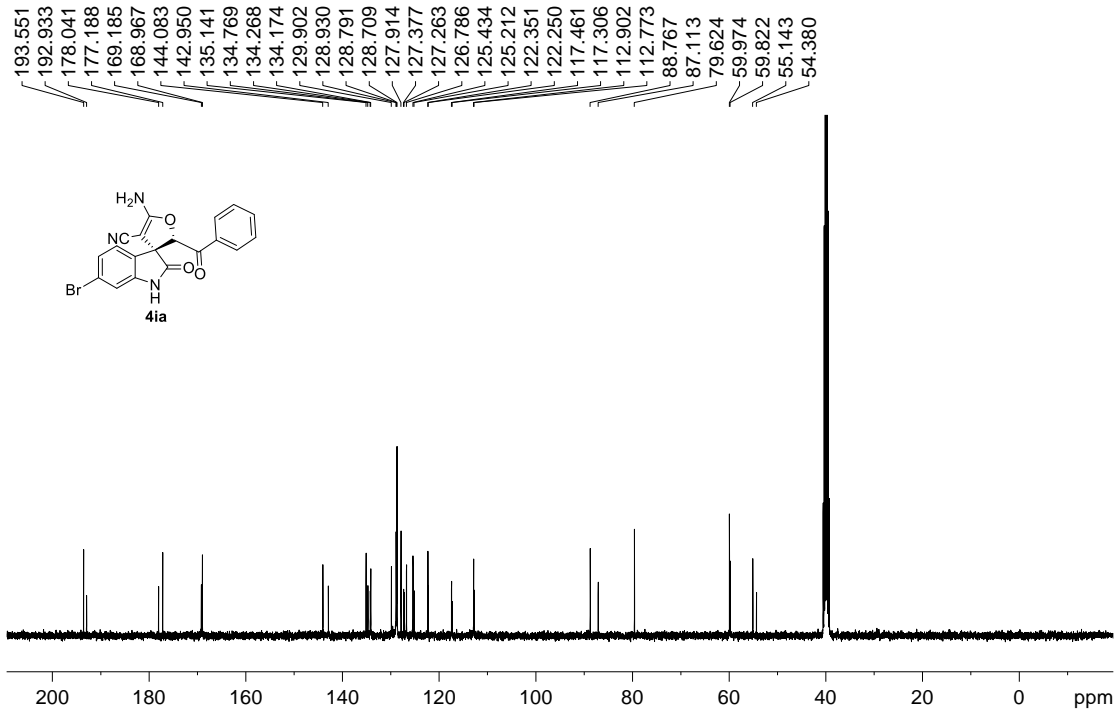

<sup>1</sup>H NMR spectrum of compound **4id** ((CD<sub>3</sub>)<sub>2</sub>SO, 400 MHz)

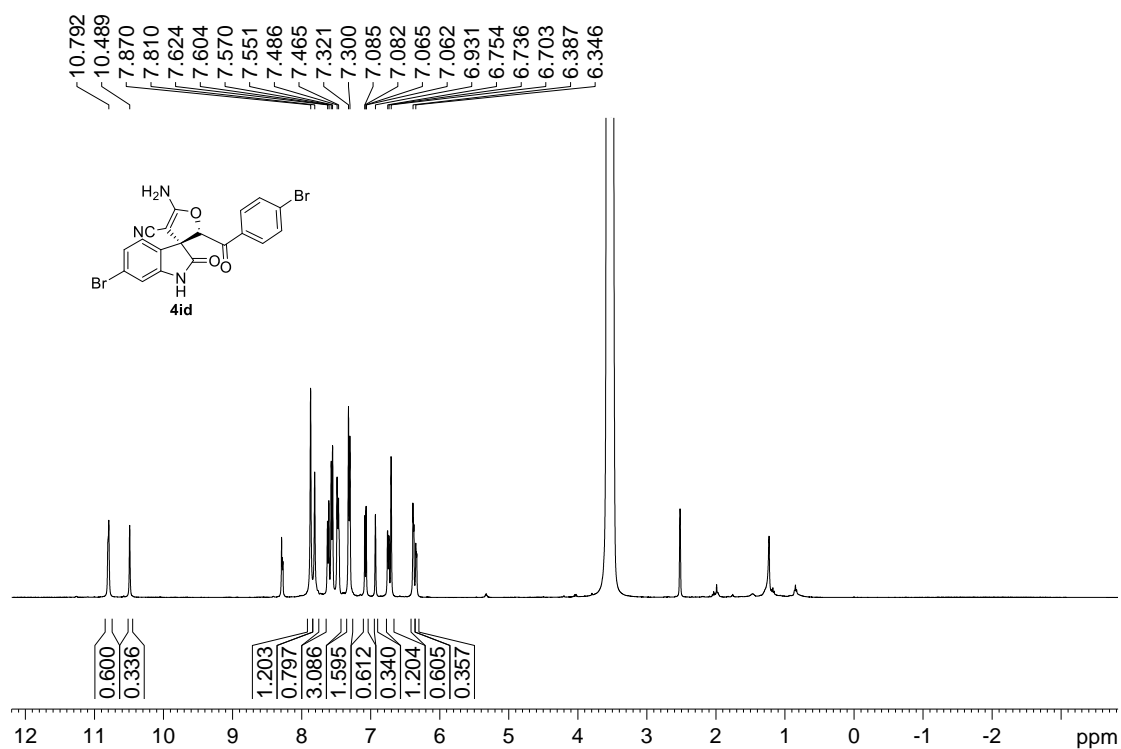

<sup>13</sup>C NMR spectrum of compound **4id** ((CD<sub>3</sub>)<sub>2</sub>SO, 100 MHz)

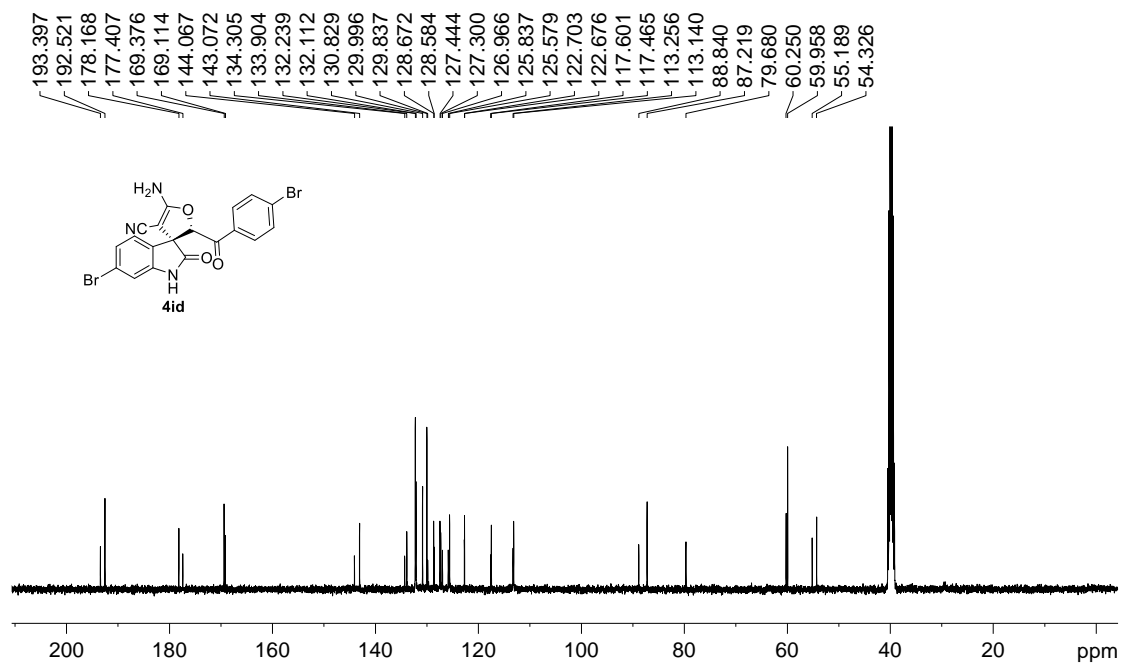

Supplement: c9ob01233h1.pdf [file c9ob01233h1.pdf]
